# Supplementary material for: Homeostatic control of cell wall hydrolysis by the WalRK two-component signaling pathway in Bacillus subtilis
Source: eLife. 2019 Dec 6;8:e52088. doi: 10.7554/eLife.52088 (PMC7299342; doi:10.7554/eLife.52088)
Supplement: Figure 1—figure supplement 1—source data 1. [file elife-52088-fig1-figsupp1-data1.xlsx]

## Sheet: Figure 1 - figure supplement 1
	Figure 1 - figure supplement 1
		Expt1	Expt2	Expt3			Mean	STDEV
	BYB729	403.604	414.014	424.36		BYB729	413.993	10.3784
	BYB778	728.477	721.132	742.45		BYB778	730.687	10.8294
	BYB1503	761.453	743.395	768.494		BYB1503	757.781	12.9465
