# Supplementary material for: Homeostatic control of cell wall hydrolysis by the WalRK two-component signaling pathway in Bacillus subtilis
Source: eLife. 2019 Dec 6;8:e52088. doi: 10.7554/eLife.52088 (PMC7299342; doi:10.7554/eLife.52088)
Supplement: Figure 1—source data 1. [file elife-52088-fig1-data1.xlsx]

## Sheet: Figure 1B
	Figure 1B
		Expt1	Expt2	Expt3			Mean	STDEV
	BYB902	340.426	337.589	377.58		BYB902	351.865	22.3152
	BYB921	758.101	687.453	853.919		BYB921	766.491	83.5494
	BYB1480	729.137	738.598	770.135		BYB1480	745.957	21.4668		bYB902 vs. bYB921				bYB902 vs. bYB1480				bYB902 vs. bYB942
	BYB942	515.177	457.279	486.189		BYB942	486.215	28.9491		t-Test: Two-Sample Assuming Unequal Variances				t-Test: Two-Sample Assuming Unequal Variances				t-Test: Two-Sample Assuming Unequal Variances
											Variable 1	Variable 2			Variable 1	Variable 2			Variable 1	Variable 2
										Mean	351.865	766.491		Mean	351.865	745.957		Mean	351.865	486.215
										Variance	497.968	6980.51		Variance	497.968	460.825		Variance	497.968	838.049
										Observations	3	3		Observations	3	3		Observations	3	3
										Hypothesized Mean Difference	0			Hypothesized Mean Difference	0			Hypothesized Mean Difference	0
										df	2			df	4			df	4
										t Stat	-8.30446			t Stat	-22.0443			t Stat	-6.3664
										P(T<=t) one-tail	0.00709618			P(T<=t) one-tail	1.25315e-05			P(T<=t) one-tail	0.00156058
										t Critical one-tail	2.91999			t Critical one-tail	2.13185			t Critical one-tail	2.13185
										P(T<=t) two-tail	0.0141924			P(T<=t) two-tail	2.50631e-05			P(T<=t) two-tail	0.00312116
										t Critical two-tail	4.30265			t Critical two-tail	2.77645			t Critical two-tail	2.77645
										calculations done considering alpha to be 0.05
										used t-test for two-sample assuming unequal variances, e.g. Welch's t-test
