# Supplementary material for: Homeostatic control of cell wall hydrolysis by the WalRK two-component signaling pathway in Bacillus subtilis
Source: eLife. 2019 Dec 6;8:e52088. doi: 10.7554/eLife.52088 (PMC7299342; doi:10.7554/eLife.52088)
Supplement: Figure 2—source data 1. [file elife-52088-fig2-data1.xlsx]

## Sheet: Figure2A
	Figure 2A
		Expt1	Expt2	Expt3			Mean	STDEV
	BYB729	429.772	350.14	388.106		BYB729	389.956	56.3082
	BYB1065	176.898	150.377	192.616		BYB1065	163.637	18.7531
	BYB1382	382.651	365.56	351.852		BYB1382	374.106	12.0851
