# Supplementary material for: Homeostatic control of cell wall hydrolysis by the WalRK two-component signaling pathway in Bacillus subtilis
Source: eLife. 2019 Dec 6;8:e52088. doi: 10.7554/eLife.52088 (PMC7299342; doi:10.7554/eLife.52088)
Supplement: Figure 2—source data 2. [file elife-52088-fig2-data2.xlsx]

## Sheet: Figure 2D
	Figure 2D
		Expt1	Expt2	Expt3			Mean	STDEV
	BYB1433 - 50mM	208.783	198.631	212.81		BYB1433 - 50mM	206.741	7.30655
	BYB1433 - 30mM	252.351	236.518	232.272		BYB1433 - 30mM	240.38	10.5819
	BYB1433 - 20mM	313.496	300.37	300.37		BYB1433 - 20mM	304.745	7.57852
	BYB1433 - 15mM	355.242	330.463	333.014		BYB1433 - 15mM	339.573	13.6297
	BYB1433 - 10mM	402.718	403.077	411.692		BYB1433 - 10mM	405.829	5.08089
	BYB1433 - 2mM	469.929	464.832	468.327		BYB1433 - 2mM	467.696	2.60636
	BYB942	485.054	464.104	467.005		BYB942	472.054	11.3507
	WT BYB902	389.964	385.185	386.831		WT BYB902	387.327	2.42773
