# Supplementary material for: Homeostatic control of cell wall hydrolysis by the WalRK two-component signaling pathway in Bacillus subtilis
Source: eLife. 2019 Dec 6;8:e52088. doi: 10.7554/eLife.52088 (PMC7299342; doi:10.7554/eLife.52088)
Supplement: Figure 3—source data 2. [file elife-52088-fig3-data2.xlsx]

## Sheet: Figure 3E
	Figure 3E
		Expt1	Expt2	Expt3			Mean	STDEV
	BYB729	360.222	361.405	320.658		BYB729	347.428	23.1911
	BYB1065	184.422	177.708	149.375		BYB1065	170.502	18.6018
	BYB1081	1441.77	1395.7	1341.77		BYB1081	1393.08	50.0515
	BYB1117	625.55	622.982	552.744		BYB1117	600.425	41.3132
	BYB1400	622.982	650.839	592.036		BYB1400	621.952	29.415
	BYB1432	541.882	534.077	473.862		BYB1432	516.607	37.2231
