# Supplementary material for: Homeostatic control of cell wall hydrolysis by the WalRK two-component signaling pathway in Bacillus subtilis
Source: eLife. 2019 Dec 6;8:e52088. doi: 10.7554/eLife.52088 (PMC7299342; doi:10.7554/eLife.52088)
Supplement: Figure 4—source data 1. [file elife-52088-fig4-data1.xlsx]

## Sheet: Figure 4B
	Figure 4B
		Expt1	Expt2	Expt3			Mean	STDEV
	BYB1344	989.61	899.418	926.722		BYB1344	938.583	46.2515
	BYB1367	1636.88	1750.79	1679.95		BYB1367	1689.21	57.517
	BYB1369	1121.43	990.071	1052.04		BYB1369	1054.51	65.7136
	BYB1344	817.724	899.418	926.722		BYB1344	881.288	56.7154
	BYB1370	263.116	333.333	317.427		BYB1370	304.626	36.8175
	BYB1383	712.914	762.577	741.395		BYB1383	738.962	24.9208
