# Supplementary material for: Homeostatic control of cell wall hydrolysis by the WalRK two-component signaling pathway in Bacillus subtilis
Source: eLife. 2019 Dec 6;8:e52088. doi: 10.7554/eLife.52088 (PMC7299342; doi:10.7554/eLife.52088)
Supplement: Figure 4—source data 2. [file elife-52088-fig4-data2.xlsx]

## Sheet: Figure 4C
	Figure 4C
		Expt1	Expt2	Expt3			Mean	STDEV
	BYB1348	15.8472	16.6876	11.6525		BYB1348	14.7291	2.69736
	BYB1363	6.21812	5.97105	5.50426		BYB1363	5.89781	0.36252
	BYB1365	5.72067	5.17943	5.23228		BYB1365	5.37746	0.298401
	BYB1348	16.6876	12.8472	9.65251		BYB1348	13.0625	3.5225
	BYB1362	230.986	176.529	180.774		BYB1362	196.096	30.2896
	BYB1384	17.8965	12.3261	12.082		BYB1384	14.1015	3.28881
