# Supplementary material for: Homeostatic control of cell wall hydrolysis by the WalRK two-component signaling pathway in Bacillus subtilis
Source: eLife. 2019 Dec 6;8:e52088. doi: 10.7554/eLife.52088 (PMC7299342; doi:10.7554/eLife.52088)
Supplement: Figure 4—source data 3. [file elife-52088-fig4-data3.xlsx]

## Sheet: Figure 4F cwlO depletion 
Figure 4F - cwlO depletion (Pyoch); data from getSignal1 script
signal_t0_bGD308_61		signal_t0_bGD308_419		signal_t0_bGD308_411		signal_t0_bGD300_61		signal_t0_bGD300_419		signal_t0_bGD300_411		signal_30m_bGD308_61		signal_30m_bGD308_419		signal_30m_bGD308_411		signal_30m_bGD300_61		signal_30m_bGD300_419		signal_30m_bGD300_411
0.0058166		0.0063043		0.00598859		0.00661462		0.00525939		0.00536935		0.0185142		0.00942298		0.0196895		0.0076365		0.00493971		0.00558003
0.00705566		0.00447169		0.00536171		0.00686604		0.00499627		0.00375015		0.019188		0.0106926		0.0179654		0.00798341		0.00502648		0.00602234
0.00693309		0.00682819		0.00523129		0.00697752		0.00486828		0.00576981		0.0191232		0.0106304		0.00935812		0.007921		0.00599764		0.00568614
0.00669812		0.00542845		0.0061769		0.00654558		0.00540007		0.00478226		0.0202782		0.0107173		0.0140429		0.00699587		0.00519816		0.00529861
0.00657814		0.00670239		0.00504951		0.00706155		0.00524561		0.00630291		0.0171879		0.0110817		0.016891		0.00758122		0.00441835		0.00562367
0.00662481		0.00550592		0.00798485		0.0067688		0.00492323		0.00524359		0.0168586		0.0114556		0.011734		0.00793064		0.00469205		0.00421004
0.00786779		0.00560714		0.00802396		0.00628813		0.00530663		0.00583035		0.0171739		0.0125437		0.0181584		0.00826649		0.00478679		0.00471873
0.00606592		0.00635857		0.00491358		0.00599456		0.00502416		0.00508999		0.0172847		0.0125991		0.0115104		0.00802253		0.00436002		0.00515375
0.00612199		0.00602157		0.00511853		0.00575381		0.00513652		0.00519083		0.0195095		0.0128774		0.0150984		0.00755619		0.00579341		0.00530946
0.00574326		0.00620673		0.00548863		0.00597469		0.00584351		0.00415037		0.0173315		0.0125769		0.010647		0.0081973		0.00536771		0.00550853
0.00571467		0.00653949		0.00783248		0.00603308		0.00537412		0.00486903		0.0182639		0.0132783		0.0131903		0.00979909		0.00559287		0.00581122
0.00690489		0.00678211		0.0063856		0.00705712		0.00562131		0.00501873		0.0181174		0.0155371		0.0102344		0.00971503		0.00641081		0.00543047
0.00675417		0.00596046		0.00486452		0.00661756		0.00612201		0.00505842		0.0172984		0.0130166		0.0108274		0.0097677		0.0051267		0.0054599
0.0074731		0.00633846		0.00552829		0.00670282		0.00620299		0.00526062		0.0183387		0.0138998		0.0162384		0.00833713		0.00538701		0.00585402
0.00731292		0.0054295		0.00646592		0.00655765		0.00504611		0.00403041		0.0180578		0.0146178		0.0143308		0.0071148		0.00670108		0.00473671
0.00831663		0.00603136		0.0062523		0.00680171		0.00565986		0.00505096		0.0189997		0.0105333		0.0131405		0.00966703		0.00511796		0.00686513
0.0069536		0.00646489		0.00491107		0.00684129		0.00527403		0.00548438		0.0209931		0.0167983		0.0142572		0.00842995		0.0065613		0.00635784
0.00876109		0.00521766		0.00490312		0.00745865		0.00504166		0.00409496		0.0172078		0.0175438		0.0164694		0.00791059		0.00537334		0.0077869
0.00646585		0.00578099		0.00478835		0.00717234		0.00532338		0.00425109		0.0139223		0.0140617		0.0142457		0.00746439		0.00567596		0.00828263
0.00747431		0.00565919		0.00454274		0.00711528		0.00608125		0.00404017		0.018026		0.0103474		0.011128		0.00748712		0.00505078		0.00827488
0.00987569		0.00552485		0.00513177		0.00672562		0.00702256		0.00544493		0.018988		0.0107285		0.0135036		0.00896189		0.00653813		0.00501259
0.00973179		0.00641433		0.00663404		0.00738471		0.00555309		0.00409066		0.0190876		0.0099326		0.0122419		0.00726439		0.00575092		0.00671556
0.00656072		0.00550581		0.00607852		0.00766641		0.00618135		0.00439888		0.0177034		0.017547		0.0103247		0.00586068		0.0051836		0.00531217
0.00679626		0.00599393		0.0056267		0.00710616		0.00537044		0.00508147		0.0178853		0.0111521		0.0105241		0.00780515		0.00494173		0.00555528
0.0075407		0.00700405		0.0069133		0.00501023		0.00577456		0.00541579		0.0162838		0.0154439		0.00971738		0.00970842		0.00508683		0.00699513
0.00768447		0.00556779		0.00540126		0.00748122		0.00512689		0.00433372		0.014587		0.0177592		0.0150811		0.00829722		0.00621846		0.00821301
0.00761894		0.00675194		0.00759574		0.00581523		0.00528936		0.00539433		0.0149425		0.0148341		0.013858		0.00938827		0.00584047		0.0074886
0.00743291		0.00596333		0.00588005		0.00705073		0.00487914		0.00612659		0.0233417		0.0138449		0.0105968		0.00857463		0.00553787		0.00641576
0.00749125		0.0068607		0.00717556		0.0062082		0.0067115		0.00493		0.0176535		0.0168652		0.0123485		0.00677894		0.00467026		0.00765026
0.00661675		0.00660059		0.00687249		0.00590775		0.00518739		0.00498065		0.0179369		0.0106821		0.0159233		0.0068153		0.00553089		0.00844701
0.00825389		0.00638451		0.00509134		0.00575975		0.005291		0.00546596		0.0276518		0.0127799		0.0169872		0.00656345		0.00584971		0.00610757
0.00880945		0.00592725		0.00719851		0.00689202		0.00595577		0.0054975		0.0197847		0.0156798		0.0137978		0.00689607		0.00740699		0.00728869
0.00958039		0.00548667		0.00734206		0.00721775		0.00666112		0.00674999		0.0192389		0.0140148		0.014586		0.00779632		0.00595013		0.00549006
0.00931493		0.00745247		0.0063557		0.00721569		0.00584973		0.0049653		0.0217241		0.0138473		0.0150187		0.00729509		0.00703523		0.00553128
0.00769243		0.00622245		0.00430771		0.00723801		0.00561896		0.00567759		0.0221585		0.0150055		0.0140926		0.00711845		0.00579806		0.00581543
0.00744286		0.00747008		0.00649496		0.00764445		0.00513822		0.00558336		0.0192306		0.0137981		0.0131253		0.00763325		0.00615842		0.00630527
0.00830515		0.00653516		0.00588822		0.00776541		0.00584974		0.00634425		0.0204332		0.013377		0.017637		0.00905558		0.00751152		0.00670153
0.00811234		0.00689172		0.0061648		0.0065104		0.00452033		0.00626303		0.0180245		0.0143118		0.0166668		0.00864617		0.00683999		0.00663806
0.0066032		0.00678042		0.00519699		0.00674569		0.00495484		0.0061139		0.0166097		0.0148665		0.0191221		0.00886426		0.00759336		0.00612215
0.00656972		0.00759605		0.00652358		0.00770408		0.00447332		0.00543952		0.0182228		0.0158084		0.0165742		0.00820788		0.0056569		0.00677754
0.00715105		0.00519452		0.00730549		0.00809662		0.00508718		0.00520666		0.0172162		0.0151164		0.0170919		0.00846901		0.00550953		0.00712233
0.00751407		0.00765887		0.00713868		0.00665079		0.00508321		0.0050588		0.0159891		0.0131148		0.0146171		0.00816906		0.00590883		0.00741804
0.00797318		0.00559455		0.00590075		0.00667589		0.00504848		0.00446009		0.0186618		0.0132425		0.0156596		0.0074595		0.0051273		0.00493892
0.00777755		0.00774798		0.00712783		0.00690138		0.00474255		0.00632003		0.0162777		0.0153703		0.01412		0.00782042		0.00611732		0.00732194
0.00664719		0.00758158		0.00635235		0.00756547		0.0044838		0.00436991		0.0203938		0.0172223		0.0192955		0.00631797		0.00754599		0.00701303
0.00638957		0.00505018		0.00644429		0.00698197		0.0058602		0.00512102		0.0191616		0.0179316		0.0134703		0.00595554		0.00744882		0.00698405
0.00658547		0.00751078		0.00602455		0.00688563		0.00581735		0.00659328		0.0181791		0.0127606		0.0117889		0.00679252		0.00523951		0.0050713
0.00693213		0.00704691		0.004611		0.00745625		0.00550936		0.00526405		0.0202802		0.0137488		0.0183688		0.0081412		0.00626036		0.00569784
0.00867182		0.00541082		0.00758931		0.00709044		0.00575128		0.00570291		0.0179328		0.0156329		0.0153015		0.00844218		0.00720549		0.00475657
0.00765081		0.00561423		0.0059975		0.0075607		0.00486566		0.0059867		0.0271149		0.0154351		0.0192226		0.0069491		0.00755644		0.0046108
0.00739279		0.00622734		0.00647352		0.00701991		0.00485521		0.00581433		0.0278761		0.014183		0.011612		0.00672911		0.00598006		0.00604486
0.00731355		0.00584361		0.00658878		0.00746114		0.00527994		0.00497552		0.019066		0.0184259		0.0112435		0.00758069		0.00483093		0.00562964
0.00791218		0.00582724		0.00612375		0.00826029		0.00557048		0.00581388		0.0182062		0.0130804		0.0154852		0.00745701		0.00601749		0.00480606
0.00693936		0.00669414		0.00776795		0.00665805		0.00543626		0.00548352		0.0187337		0.0171274		0.0126556		0.00774839		0.00475847		0.00482184
0.0072967		0.00631944		0.00733063		0.00759742		0.00545579		0.00506092		0.0209116		0.0154281		0.0144681		0.0073381		0.00583808		0.0049956
0.00767396		0.00514977		0.00690478		0.00750647		0.00554807		0.0051442		0.0191089		0.0145853		0.01384		0.00714913		0.00684896		0.00492746
0.00748996		0.00594345		0.00555059		0.00798384		0.00511048		0.00498954		0.0139442		0.014686		0.0155047		0.0072756		0.00640179		0.00592005
0.00600909		0.00480288		0.00732194		0.0083065		0.00697243		0.00552005		0.0193379		0.0182757		0.0129545		0.00803595		0.00656463		0.0064547
0.00566321		0.00589594		0.00681632		0.0060281		0.00698724		0.0044805		0.0191133		0.0133406		0.0134536		0.00747927		0.00646809		0.006618
0.00851609		0.00530463		0.00557847		0.00586484		0.00637682		0.00567587		0.0181034		0.0142626		0.0140689		0.00790522		0.00710547		0.00580219
0.00802692		0.00579294		0.00588324		0.00810868		0.00617185		0.0055258		0.0169875		0.0174281		0.0194185		0.00699491		0.00657745		0.00615443
0.00700228		0.00653444		0.00502721		0.00790849		0.00646162		0.00620503		0.0222412		0.011481		0.0157643		0.00700552		0.00779539		0.00551924
0.00653234		0.00556944		0.00651353		0.00572409		0.00495062		0.00468631		0.0170564		0.0142293		0.0201354		0.00741345		0.00676004		0.00553095
0.00684101		0.00570144		0.00645383		0.00572674		0.00506457		0.00604001		0.0179774		0.0122395		0.0153354		0.00751494		0.0082268		0.00560627
0.00774377		0.00560098		0.00825922		0.00569268		0.00453412		0.005299		0.0178697		0.0140003		0.0146995		0.00655494		0.00648599		0.00545387
0.00784963		0.00627513		0.00754422		0.00547062		0.00456719		0.00622563		0.0176819		0.0155439		0.0149503		0.00663267		0.00544978		0.00576545
0.00766266		0.00601526		0.00565482		0.00504621		0.00515212		0.00571381		0.0175865		0.015829		0.0205897		0.00879173		0.00589788		0.00749027
0.0076634		0.00776654		0.00712884		0.00553657		0.005121		0.00548962		0.0260523		0.0124868		0.0149079		0.00755014		0.00730927		0.00607106
0.00767623		0.00742756		0.0053434		0.0048877		0.00482476		0.00564123		0.0265603		0.0178638		0.0125243		0.00808614		0.0079896		0.00579524
0.00565498		0.00597148		0.00437077		0.00545154		0.00485136		0.00518927		0.0235235		0.0187263		0.0154369		0.00793397		0.00399431		0.00668323
0.00558845		0.00578388		0.00572077		0.00545994		0.00467576		0.00544926		0.0241442		0.0152934		0.0205734		0.00817825		0.0042143		0.00643501
0.00538356		0.00643589		0.00533552		0.00694136		0.00433464		0.00561101		0.023256		0.01705		0.0185293		0.00802699		0.0065787		0.00577126
0.00552658		0.00774283		0.00629108		0.00646223		0.00578218		0.00459191		0.0250128		0.0200122		0.0149897		0.00788126		0.00632135		0.00649226
0.00796501		0.00773259		0.00777031		0.00659639		0.00618294		0.00537145		0.0172575		0.0151898		0.016996		0.00813774		0.0054971		0.0054428
0.00755734		0.00768348		0.00637123		0.00616609		0.00600698		0.00637129		0.0182429		0.0175317		0.0178242		0.00813405		0.00560226		0.00525466
0.00581016		0.0054637		0.0061911		0.00778715		0.00516807		0.00459163		0.0158114		0.018338		0.02005		0.00740625		0.00528475		0.00696479
0.00564545		0.0077968		0.00559855		0.00792646		0.00507558		0.00586271		0.0157903		0.0109631		0.0172365		0.00708621		0.00562516		0.00765688
0.00730013		0.00791137		0.0060494		0.00757885		0.00443681		0.00527619		0.0173676		0.0165381		0.0198112		0.0069225		0.00476115		0.00647765
0.00707627		0.00629189		0.00626123		0.0079145		0.00469854		0.00514347		0.0161757		0.0181334		0.0155516		0.00717142		0.00504763		0.00663955
0.00806064		0.00573965		0.00617393		0.00721238		0.00556017		0.00456781		0.016619		0.016078		0.0170256		0.00666514		0.00561677		0.00626923
0.00801427		0.00509995		0.00641265		0.00741453		0.00551404		0.00528931		0.0157854		0.0138041		0.0131065		0.00629533		0.00578292		0.00574803
0.00780417		0.00441205		0.00664785		0.00584303		0.00573329		0.00477978		0.0227492		0.0164563		0.0158099		0.00716075		0.00477815		0.00555101
0.00866253		0.0072455		0.00547463		0.0057291		0.00545134		0.00454843		0.0221021		0.0165817		0.0164754		0.00710532		0.00495207		0.00649946
0.00825513		0.00722523		0.00640187		0.00637706		0.00524545		0.00567907		0.0238412		0.017129		0.0129287		0.00853769		0.00629725		0.00643056
0.00663901		0.00662689		0.00601014		0.0060151		0.00549957		0.00586676		0.024287		0.0175655		0.0134908		0.00912006		0.00512087		0.00565796
0.00698539		0.00667157		0.00667171		0.00705519		0.0053075		0.00607015		0.0129685		0.0154555		0.0159893		0.00754892		0.00523552		0.00553408
0.00703596		0.00631982		0.005513		0.0072898		0.00604504		0.00479811		0.0132856		0.0169006		0.0181187		0.00756461		0.00487563		0.00659431
0.00763533		0.00438264		0.00611789		0.00833551		0.00494983		0.00533032		0.0140499		0.0124439		0.0166902		0.00774942		0.00508705		0.00615967
0.00769714		0.00498042		0.00609242		0.00822494		0.00531179		0.00488124		0.0131231		0.0109156		0.0155584		0.00657814		0.00521649		0.00588608
0.00677571		0.00570027		0.00580015		0.00729845		0.00591984		0.00487432		0.0186299		0.0173083		0.0167596		0.00794391		0.00512297		0.00652922
0.00680606		0.005651		0.00593732		0.00771202		0.00595898		0.004829		0.0188564		0.0178787		0.0181351		0.00830113		0.00765206		0.00668646
0.00700186		0.00563998		0.00576307		0.00597223		0.00723091		0.00491823		0.0182772		0.0131775		0.0120086		0.0078805		0.00597797		0.00659383
0.00714566		0.00624892		0.00558222		0.00617457		0.00658169		0.00473281		0.0189748		0.0172958		0.0177903		0.00659368		0.00592911		0.00681596
0.00743366		0.00651428		0.00632577		0.00607896		0.00587827		0.0049083		0.0161023		0.0101857		0.0163408		0.008049		0.00558909		0.00727463
0.00765964		0.00489366		0.00503787		0.00716268		0.00571952		0.00471293		0.0167118		0.0121042		0.0127376		0.00670268		0.00557309		0.00714804
0.00758703		0.00479531		0.00652862		0.00610471		0.00544748		0.00466993		0.0183308		0.0119835		0.0143302		0.00713477		0.00649942		0.00751447
0.00756876		0.00560074		0.00685204		0.0077362		0.00523739		0.00587971		0.0196862		0.0136947		0.0140643		0.00784835		0.00784447		0.00635367
0.0055023		0.00564753		0.00605345		0.00575736		0.00475018		0.00554412		0.0155321		0.0121799		0.0118747		0.00736354		0.00700129		0.00821351
0.00609448		0.00490292		0.00696033		0.00704866		0.00472181		0.00653213		0.0159051		0.0144511		0.0143781		0.00714743		0.00508537		0.00673799
0.0061346		0.00506367		0.00546026		0.0065416		0.00475805		0.00534155		0.0162709		0.0132863		0.0148842		0.00834137		0.00556822		0.00607373
0.00585271		0.00472158		0.00560502		0.00699574		0.00465004		0.0040998		0.0157527		0.0138163		0.015858		0.00788331		0.00967358		0.00730522
0.00639624		0.00481753		0.00534264		0.00562438		0.00479499		0.00718043		0.0173318		0.0152602		0.0164037		0.0064445		0.00580563		0.00722299
0.00616767		0.0070974		0.00571853		0.00546583		0.00491955		0.00726565		0.0177615		0.0145377		0.0133753		0.00716736		0.00592444		0.00687116
0.00691786		0.00655502		0.00505727		0.00617129		0.00496485		0.00621653		0.0147523		0.013093		0.012975		0.0067426		0.00593275		0.00650956
0.00701431		0.00525342		0.00522671		0.00806358		0.00504612		0.00616614		0.0157601		0.0132481		0.00911696		0.00786237		0.00593726		0.00631687
0.00674226		0.00520945		0.00568823		0.00774175		0.00505701		0.00486952		0.0201704		0.0145809		0.00995248		0.00719892		0.00736849		0.00739213
0.00549725		0.00587826		0.00751264		0.00664511		0.00474435		0.00521656		0.0240628		0.0128382		0.0138451		0.00702388		0.00778611		0.00547533
0.007025		0.00613113		0.00558192		0.00673079		0.00398604		0.00538764		0.0208682		0.0143306		0.0117432		0.00690822		0.00675722		0.00557543
0.0065373		0.0053872		0.00659819		0.00641392		0.00487361		0.00589739		0.0190791		0.0152199		0.0128665		0.00627394		0.00666759		0.00586792
0.00665458		0.00522488		0.00652239		0.00590509		0.00445613		0.00595731		0.0166499		0.00927964		0.0132819		0.00622106		0.00539022		0.00523344
0.00671629		0.00538187		0.00659827		0.005045		0.00565107		0.00586453		0.0212694		0.0104117		0.013878		0.00616105		0.006834		0.00469879
0.00620934		0.00519465		0.00570997		0.00490288		0.00400925		0.00600258		0.0168355		0.0123702		0.0148713		0.00648875		0.00730118		0.00551285
0.00656256		0.00546781		0.00810154		0.0063457		0.00482755		0.0061044		0.0218453		0.0130167		0.0143829		0.00675542		0.00752096		0.00454524
0.00607604		0.00786953		0.00615294		0.00641214		0.00642296		0.00619861		0.0171752		0.0116433		0.0159911		0.00621399		0.00575806		0.00493112
0.00779082		0.0077386		0.00502009		0.0060013		0.00433502		0.00516919		0.0188793		0.0108496		0.0137056		0.00846604		0.00587769		0.0051779
0.00850924		0.00506906		0.00538732		0.00585339		0.0038275		0.00532048		0.0177718		0.0122307		0.0152496		0.007614		0.00707176		0.00452892
0.00711683		0.00494953		0.00564308		0.00616897		0.00474645		0.00644025		0.0242838		0.0127764		0.0136379		0.00692145		0.00651467		0.00581824
0.0078707		0.00502684		0.00553949		0.00546887		0.00510146		0.00670415		0.0251278		0.0129371		0.0131872		0.00708545		0.00688817		0.00467048
0.0074307		0.00557579		0.00534114		0.00758673		0.00448925		0.00657532		0.0224703		0.0137335		0.0137254		0.00704016		0.00675101		0.00571726
0.00672993		0.00723906		0.00544232		0.00765078		0.0054642		0.00680403		0.0169553		0.0121187		0.0160982		0.00795214		0.00682112		0.00543972
0.00713996		0.00732158		0.0059703		0.00626367		0.00606126		0.00511437		0.0211174		0.0129633		0.0125822		0.0070453		0.0048106		0.00475171
0.00632872		0.00616614		0.0053837		0.00633171		0.00470691		0.00545434		0.0231534		0.0118315		0.0137589		0.00727372		0.00491829		0.00611592
0.00693756		0.0070695		0.00563828		0.00663732		0.00470011		0.00542562		0.0239251		0.0125021		0.0134063		0.00731039		0.00592492		0.00569332
0.00574236		0.00535907		0.00571626		0.00764707		0.00519292		0.00548277		0.0228512		0.0132931		0.0124526		0.00882959		0.00549948		0.00452403
0.00674738		0.00535563		0.00694397		0.00730538		0.00478825		0.00562238		0.0243337		0.0138119		0.010566		0.00651404		0.00575493		0.00476407
0.00667717		0.00585409		0.00767987		0.00713675		0.00512582		0.00580765		0.0223572		0.0107864		0.0111761		0.00633569		0.00584138		0.00633741
0.0069298		0.00581897		0.00696187		0.00722007		0.00511502		0.0054758		0.0217845		0.0107464		0.0109475		0.00652267		0.00646109		0.00642339
0.00709715		0.00598368		0.00739904		0.0058191		0.00589795		0.00545953		0.0198247		0.011834		0.0180473		0.00628184		0.00675688		0.00525262
0.00680837		0.00607127		0.00541871		0.00606565		0.00561897		0.00392527		0.0198396		0.0127526		0.0165354		0.00780549		0.00725912		0.00673316
0.00638312		0.00513456		0.00565814		0.00630791		0.00496408		0.00398928		0.0196182		0.0134867		0.0152829		0.00668634		0.00732395		0.00631198
0.00610807		0.00490965		0.00602946		0.00612454		0.00619394		0.00601523		0.0189191		0.0143753		0.0125603		0.00648523		0.0080459		0.00628232
0.00615258		0.00494356		0.00764419		0.00600392		0.00600592		0.00638303		0.0239434		0.0157336		0.0130904		0.0072699		0.00833701		0.00644818
0.00681851		0.00521383		0.00730143		0.00599081		0.0060552		0.00552651		0.0250935		0.0165433		0.0137407		0.00766686		0.00703825		0.00587689
0.00682238		0.00551229		0.00574668		0.00610199		0.00689999		0.00580932		0.024666		0.0137017		0.0144396		0.0102965		0.00728915		0.00613144
0.00612056		0.00643463		0.00615027		0.00739692		0.00536403		0.00456091		0.0187193		0.0144473		0.0178962		0.00850352		0.00665205		0.00619418
0.00626934		0.00634509		0.00637292		0.00622877		0.00615595		0.0047818		0.0173825		0.0147924		0.0165489		0.00780327		0.00739467		0.00609213
0.00596746		0.00612443		0.0062364		0.00645313		0.00635065		0.00545549		0.0160685		0.0174106		0.0157512		0.00802694		0.00720622		0.0063736
0.00642068		0.00684553		0.00650121		0.00652772		0.00692898		0.00535705		0.013834		0.0175087		0.0144159		0.00827464		0.00672211		0.00559683
0.00622307		0.00724479		0.00571872		0.0089176		0.00644734		0.00647693		0.0156192		0.0134648		0.0146849		0.00717857		0.00681872		0.00646291
0.00600798		0.00683162		0.00584314		0.00697405		0.00519808		0.0064957		0.0249872		0.0140165		0.014395		0.00722224		0.0073638		0.0059495
0.00589625		0.00641057		0.00617337		0.00714029		0.00565728		0.00533478		0.0211279		0.0145518		0.0145133		0.00833082		0.00717		0.00549549
0.00554877		0.00627003		0.00522487		0.00874254		0.00540746		0.00527073		0.0210055		0.0147724		0.017262		0.00972552		0.00583084		0.00607963
0.00564033		0.00560743		0.00552337		0.00885467		0.00563224		0.00611364		0.0171608		0.014325		0.0178636		0.00965273		0.00586096		0.00719902
0.00670957		0.00571816		0.00680134		0.00744567		0.00596418		0.00544545		0.0201087		0.0132329		0.0127422		0.00727586		0.006763		0.00775112
0.00627452		0.00648244		0.00641055		0.00629856		0.0051946		0.00473651		0.0200852		0.0117863		0.0143781		0.00663793		0.00621793		0.00574532
0.00621319		0.0063641		0.00622421		0.00926428		0.00468088		0.00592186		0.0164948		0.0143873		0.0152072		0.00768402		0.00673769		0.00613579
0.00588625		0.00779505		0.00569861		0.00923181		0.00596347		0.00686552		0.0172103		0.014825		0.0165566		0.00602395		0.00696647		0.007799
0.00572466		0.00838131		0.00591323		0.00787685		0.00551267		0.00395081		0.0191096		0.0150686		0.0197748		0.00796728		0.00546876		0.00601697
0.00689344		0.00530919		0.00675299		0.00610533		0.00533392		0.00623123		0.0178607		0.0139538		0.0193402		0.00725338		0.0053222		0.00607774
0.00669449		0.00552174		0.00679762		0.00708049		0.00580245		0.00373531		0.0202916		0.01555		0.0131805		0.00751747		0.00487868		0.00828116
0.00665112		0.00640085		0.00499623		0.00749945		0.00547221		0.00542414		0.0193897		0.0148736		0.0144716		0.00732031		0.00507043		0.00530738
0.0066028		0.00616126		0.00492422		0.00802726		0.00551643		0.00545896		0.0245529		0.0153045		0.0142196		0.00709454		0.00512388		0.00629585
0.00674825		0.00535298		0.00554581		0.0076082		0.00541733		0.00469804		0.0149055		0.0113698		0.0130922		0.00909592		0.00492282		0.00876264
0.00641565		0.00514107		0.00593293		0.00778295		0.00529116		0.00436813		0.0153933		0.0127518		0.013201		0.00685517		0.00461476		0.00723922
0.00622993		0.0057893		0.00561708		0.0079256		0.00470558		0.00574532		0.0225442		0.0130837		0.0153398		0.00728354		0.00572977		0.00609531
0.00681393		0.00551065		0.00648042		0.00732391		0.00589475		0.00412961		0.0230613		0.0123325		0.0219176		0.00713356		0.00461463		0.00752446
0.00636954		0.00589139		0.00798533		0.00694372		0.00635004		0.00482139		0.01663		0.0156568		0.0160918		0.00548156		0.00539721		0.0054828
0.00565742		0.00557412		0.00540697		0.0095128		0.00527002		0.00460867		0.0183387		0.0107367		0.0168453		0.00844161		0.00570061		0.00866212
0.00661777		0.0061102		0.00475428		0.00777657		0.00555121		0.00605224		0.0183185		0.0159229		0.0157042		0.00746412		0.00457318		0.00732251
0.00924841		0.0050794		0.00619177		0.00607222		0.00611353		0.0053537		0.0161274		0.0135479		0.0163874		0.00878112		0.00464943		0.00712326
0.00874271		0.00584339		0.00529128		0.00615508		0.00607023		0.00536002		0.0168135		0.0155918		0.0132135		0.0093099		0.00496444		0.00554075
0.00722988		0.00497777		0.00527149		0.00758121		0.00620942		0.00565823		0.0182762		0.0156999		0.0146868		0.00995054		0.0051862		0.00645809
0.00695815		0.00542844		0.00545045		0.00639286		0.00583991		0.00432733		0.021786		0.0130338		0.0152141		0.0096078		0.00559987		0.00718142
0.00622287		0.00529771		0.00566595		0.00629926		0.00552683		0.00553137		0.0252942		0.0138835		0.0185308		0.00812298		0.00566968		0.00584857
0.00832705		0.00494039		0.00794323		0.00714925		0.00572274		0.00623352		0.0240002		0.0176118		0.0133373		0.00930266		0.00561493		0.00560348
0.0087139		0.00646045		0.00768711		0.00737878		0.0052909		0.00550887		0.0241495		0.0179948		0.0137354		0.00824002		0.00604998		0.00653445
0.0056368		0.00450323		0.00717747		0.0100239		0.00569114		0.00646647		0.0140604		0.0113757		0.0137722		0.00612183		0.00590355		0.00670667
0.00578224		0.00592637		0.00699154		0.01046		0.00587471		0.00506182		0.0232191		0.0108158		0.0168361		0.00585398		0.00510273		0.00620762
0.00887557		0.00588633		0.00814618		0.0074059		0.00595111		0.00517714		0.0221906		0.0153794		0.0157704		0.00642312		0.0059798		0.00709927
0.00868312		0.00485368		0.00780368		0.00498181		0.00538339		0.00561287		0.0204006		0.0137329		0.0164339		0.00633567		0.00602866		0.00868238
0.0076056		0.0046762		0.00592665		0.00760317		0.00565436		0.00532258		0.0174532		0.0152409		0.0153269		0.0063205		0.00717963		0.00799242
0.00863414		0.00622663		0.00597372		0.00741125		0.00521915		0.00569232		0.0167405		0.0164424		0.0146084		0.00660814		0.00620521		0.00722437
0.00652528		0.00551126		0.00554804		0.00740707		0.00596917		0.00538559		0.0183472		0.0154769		0.0138005		0.00719196		0.00767449		0.00687528
0.00665097		0.00641857		0.00602085		0.00740671		0.0050059		0.00558223		0.0200898		0.0118365		0.0193291		0.00896378		0.00663605		0.00561938
0.0048364		0.00609825		0.00587922		0.00709962		0.00518822		0.00487943		0.0209339		0.012229		0.0198896		0.0092399		0.00586664		0.00572148
0.00490328		0.00552062		0.0060825		0.0069298		0.00546448		0.00516808		0.0219473		0.0165321		0.01358		0.00668531		0.00649939		0.00571453
0.00542962		0.00501404		0.00516504		0.0058871		0.00561443		0.00597708		0.0189505		0.0181936		0.0151246		0.00679971		0.00702888		0.00569388
0.00550644		0.0055373		0.00562236		0.00549282		0.00596384		0.00402183		0.0252698		0.0156412		0.0178884		0.00697544		0.00633669		0.00569162
0.00774656		0.00605413		0.00657348		0.00840543		0.00532857		0.00490198		0.0203441		0.0137158		0.0162354		0.00701271		0.00599478		0.00558576
0.00777449		0.0070356		0.00676715		0.00738654		0.00527993		0.00489303		0.0239196		0.014074		0.0145524		0.00632287		0.00581213		0.00526044
0.00653087		0.00634968		0.00531699		0.00580726		0.00553849		0.00563998		0.0244907		0.0162091		0.0159345		0.00732325		0.00644736		0.00630287
0.00656666		0.00509494		0.00534211		0.00548379		0.00576142		0.00559004		0.0238485		0.0163596		0.0187476		0.00727312		0.00516763		0.00664983
0.00735046		0.00689856		0.00720035		0.00591624		0.00542355		0.00433935		0.0214169		0.0127045		0.0189966		0.00728376		0.00702344		0.00610912
0.00750976		0.00589297		0.00771506		0.00539503		0.00544758		0.00485321		0.0175756		0.0144162		0.0131455		0.00752126		0.00520571		0.00630285
0.0065818		0.00605639		0.00757722		0.00547919		0.00610219		0.00531163		0.0168312		0.0114629		0.0126252		0.0104313		0.0059094		0.00605788
0.00656716		0.00609955		0.0077897		0.00584687		0.00520087		0.00462095		0.0217269		0.0121861		0.015409		0.0076076		0.00517117		0.00633891
0.00671825		0.00627618		0.00669449		0.00631467		0.00550981		0.00504325		0.0172555		0.0137059		0.0151299		0.00867082		0.00644856		0.00833404
0.00649009		0.00517283		0.00620832		0.00658895		0.00510785		0.0044733		0.0220025		0.0136701		0.0128669		0.00759073		0.00602078		0.00884134
0.00551101		0.00584598		0.00649576		0.00612852		0.00532937		0.00447694		0.0212506		0.0145326		0.0152578		0.00772651		0.00591609		0.00689402
0.00546112		0.0056188		0.00719412		0.00669319		0.0052588		0.00488374		0.0229841		0.0141853		0.0175755		0.00803406		0.0079625		0.00668937
0.00617671		0.00611931		0.00635439		0.00623105		0.00557507		0.00532996		0.0231667		0.0118027		0.0181257		0.00701739		0.00597489		0.00806885
0.00621806		0.00699805		0.00609382		0.00587876		0.00662092		0.00443152		0.0232927		0.0123995		0.0115633		0.010263		0.00605854		0.00727525
0.00661978		0.00876468		0.00657312		0.00507523		0.00553498		0.00661546		0.0144931		0.0130009		0.0131961		0.0102163		0.00779539		0.00699231
0.00673198		0.00687813		0.00702543		0.00456001		0.00587809		0.00506452		0.0207119		0.0125449		0.0130934		0.00805135		0.00616301		0.00622904
0.00646539		0.004523		0.00701821		0.00582146		0.00513294		0.00555546		0.0218273		0.0163647		0.0137747		0.0074428		0.00594287		0.00645401
0.00678359		0.00490437		0.00677987		0.00572944		0.00510164		0.00550054		0.0129628		0.0146792		0.0191189		0.00749983		0.00678864		0.0051563
0.00711713		0.00554061		0.00767691		0.00480084		0.00553034		0.00436766		0.0148751		0.0126212		0.0207182		0.008473		0.00664577		0.00639252
0.00685532		0.00708953		0.00623124		0.00516061		0.00465651		0.00619504		0.0203848		0.0142796		0.0166553		0.00771271		0.00763007		0.00669425
0.00896254		0.00680662		0.00503426		0.00525739		0.00555197		0.00482754		0.0198951		0.0113102		0.0173966		0.00864688		0.00804908		0.00870407
0.00806009		0.0052054		0.00608221		0.00532643		0.00506375		0.00617111		0.0237594		0.011486		0.0221653		0.00899412		0.00759973		0.00740368
0.0067667		0.00471907		0.00521139		0.004707		0.00598472		0.00473473		0.0251063		0.0123517		0.0247532		0.00716497		0.00775568		0.0061933
0.00662295		0.00506385		0.00544724		0.00499784		0.00596077		0.00506756		0.0234701		0.0114794		0.0185566		0.00797024		0.00682053		0.00622798
0.00722199		0.00638916		0.00494097		0.00533324		0.00484912		0.00561219		0.0267198		0.0135698		0.0191994		0.00775859		0.00756937		0.0066475
0.00728279		0.00527534		0.00735707		0.00515589		0.00481026		0.00575556		0.0250312		0.0131305		0.0160931		0.00772883		0.00697249		0.00678836
0.00806403		0.00493756		0.00508564		0.00502278		0.00609531		0.00543118		0.0215252		0.013723		0.0168528		0.00789589		0.00657053		0.00619008
0.00833987		0.00700364		0.00442687		0.00470533		0.0057509		0.00484304		0.019617		0.0145599		0.0146095		0.00748725		0.00518463		0.0059405
0.00709828		0.00522558		0.00600933		0.00613931		0.00545482		0.004682		0.0245449		0.0161102		0.0149034		0.00724253		0.00555995		0.00614199
0.0068247		0.0050525		0.00640365		0.00618092		0.00537765		0.00539616		0.0161874		0.0145146		0.0133154		0.00725055		0.00562375		0.00999763
0.00608802		0.00762504		0.00518622		0.00660271		0.00474664		0.00501097		0.020276		0.0136867		0.0137024		0.00696501		0.00492587		0.00918359
0.00601596		0.00754322		0.00568127		0.0057223		0.00452879		0.0046717		0.0185715		0.0145867		0.012863		0.00716678		0.00497248		0.00835764
0.00756619		0.00554716		0.00469454		0.00562503		0.0044865		0.00487229		0.0161566		0.0169579		0.0101708		0.00672514		0.00711234		0.00556279
0.00755397		0.00701948		0.00603633		0.00589616		0.004561		0.00475445		0.0191548		0.0160602		0.0102765		0.00825501		0.00707777		0.00767035
0.00732459		0.00713023		0.00647111		0.00549938		0.00468153		0.00509521		0.0224289		0.0152316		0.0123075		0.00810038		0.00728804		0.00699589
0.00723328		0.00743513		0.00784711		0.00630041		0.00541634		0.00540379		0.0222722		0.0155495		0.0136864		0.00859429		0.00660018		0.00671599
0.00857658		0.00606073		0.008288		0.00679697		0.00505525		0.00446247		0.0206555		0.01392		0.0143947		0.00741393		0.00677044		0.00731762
0.00827538		0.00521104		0.00711775		0.00598624		0.00524948		0.00591282		0.0195071		0.0144116		0.0104933		0.00774204		0.00714961		0.00815742
0.00823328		0.00534553		0.00770993		0.00660704		0.00565789		0.00431073		0.022861		0.0149058		0.0142109		0.00921219		0.00625228		0.00769273
0.00679632		0.0057299		0.00751747		0.00659339		0.00512309		0.00569933		0.0218495		0.0148867		0.0145115		0.00938938		0.00674873		0.00671403
0.00676341		0.00705376		0.00681976		0.00902313		0.00539707		0.00692524		0.0217861		0.0106939		0.0113794		0.00829678		0.00586759		0.00607512
0.00702932		0.00564047		0.00823208		0.00854063		0.0058109		0.00543175		0.0207295		0.0108232		0.0122534		0.00826256		0.00534015		0.00753697
0.00691094		0.00754983		0.00634509		0.00755807		0.00645835		0.00483758		0.0163874		0.0118061		0.011675		0.00702127		0.00662638		0.00734235
0.0067666		0.00774293		0.00791421		0.00743054		0.00569308		0.00469004		0.0153326		0.0126886		0.0119148		0.00702098		0.00615021		0.00563586
0.00887015		0.00559326		0.00748333		0.0054692		0.00596101		0.00487989		0.0193458		0.0132147		0.0132474		0.00746034		0.00591285		0.00595769
0.00807647		0.00600425		0.00631494		0.00543872		0.00495386		0.0046138		0.0186866		0.0147164		0.0143047		0.00766142		0.00591805		0.00650866
0.00724021		0.00660509		0.00838781		0.00626124		0.00564696		0.00483376		0.0197664		0.0105609		0.0128279		0.00666561		0.00775526		0.00656056
0.00913577		0.00644144		0.00551401		0.00619939		0.00638443		0.00521218		0.0194096		0.0140821		0.0142698		0.00702075		0.00719092		0.00588981
0.00870171		0.0064645		0.00666884		0.00662459		0.00628368		0.00447707		0.0207333		0.00870832		0.0120162		0.00835654		0.00559769		0.00654232
0.00833757		0.00636026		0.00550793		0.00607501		0.00637835		0.00556561		0.0205326		0.00929514		0.0172579		0.00840296		0.00589109		0.00634718
0.00893514		0.00627583		0.00767246		0.00587574		0.00575816		0.00442986		0.0211299		0.0084449		0.0117618		0.0075556		0.00738181		0.00519531
0.00870774		0.00709398		0.006158		0.00574998		0.0051932		0.00716957		0.0219683		0.0127635		0.0121327		0.00788123		0.00659744		0.00542262
0.00703811		0.00624546		0.00773816		0.0056805		0.00505376		0.00525684		0.0222781		0.0130166		0.0151561		0.00779569		0.00602791		0.00532396
0.00659237		0.00703988		0.00667641		0.00584777		0.00492712		0.00597742		0.0208147		0.0137595		0.0154958		0.0077309		0.0065242		0.00495151
0.00811355		0.00527971		0.00540264		0.00523489		0.0049076		0.00539353		0.0211832		0.0136845		0.0155495		0.00805602		0.00744444		0.0063906
0.00860019		0.00637148		0.00504962		0.00596445		0.00456419		0.00490886		0.0268513		0.0153325		0.0108795		0.00800771		0.00691556		0.00650473
0.00883359		0.00564041		0.00588948		0.00559486		0.00444842		0.00579012		0.0286953		0.0153034		0.012874		0.00897661		0.00661627		0.00657632
0.0082315		0.00657498		0.00628701		0.00627238		0.00456962		0.00616852		0.0269569		0.0102056		0.0118391		0.00956286		0.00495804		0.00629532
0.00823813		0.00634467		0.00509371		0.00715437		0.00670151		0.00653789		0.0231016		0.0120264		0.0116891		0.00854875		0.00517887		0.00673275
0.00891975		0.00497656		0.00467326		0.00732425		0.00449389		0.00616953		0.025076		0.0137088		0.0125902		0.00759687		0.00792337		0.00430583
0.00808325		0.00445963		0.00520323		0.00748159		0.00570335		0.0060119		0.0222021		0.0120449		0.0134904		0.00831573		0.00725862		0.00425328
0.00864111		0.00463298		0.00636963		0.00688076		0.00637673		0.00556182		0.0245078		0.0148241		0.0123404		0.0068025		0.00788274		0.0059888
0.00872175		0.00560096		0.00582735		0.00676772		0.00542191		0.0064867		0.019788		0.0157776		0.0172293		0.00694053		0.00582556		0.00588093
0.00852485		0.00594346		0.00572143		0.00670827		0.00655026		0.00521091		0.0181972		0.0168991		0.0171446		0.00616612		0.00564864		0.00492445
0.00882939		0.00468082		0.00532774		0.00694499		0.00546863		0.00477757		0.0225554		0.0125104		0.016583		0.00613612		0.00617868		0.00542162
0.00655362		0.00587628		0.00630514		0.00547623		0.0064098		0.00569458		0.0208743		0.0129299		0.0187991		0.00866156		0.00523497		0.00488108
0.00656276		0.00583504		0.00641372		0.00566768		0.00573185		0.00444482		0.0217636		0.0128288		0.019331		0.00827177		0.00480671		0.00462935
0.00627947		0.00610905		0.00501297		0.00533477		0.00668009		0.00558207		0.0225108		0.0103736		0.0176748		0.00758147		0.00586141		0.00508278
0.00600345		0.00625772		0.00567344		0.00764857		0.00680591		0.00590772		0.0198853		0.0109599		0.0185495		0.00769236		0.00616964		0.00402702
0.007585		0.0061295		0.00669145		0.00641736		0.00672591		0.00578495		0.0211271		0.0107835		0.0142445		0.00763331		0.00542179		0.00485162
0.00717837		0.00600232		0.00800808		0.00641088		0.00754748		0.00567001		0.0194377		0.0102064		0.0165731		0.00793068		0.0059993		0.00572123
0.00691838		0.0055887		0.00713646		0.00433007		0.00745596		0.00582666		0.0185623		0.0115954		0.0187546		0.00967958		0.00562168		0.00537299
0.00724689		0.0058384		0.00571451		0.00426367		0.0077436		0.00642141		0.0184553		0.0178699		0.0163871		0.00809288		0.004653		0.00489949
0.00636792		0.00559569		0.00698287		0.00513657		0.00816371		0.00593673		0.0177358		0.0173079		0.020982		0.0102069		0.00590885		0.00452916
0.00614682		0.00591174		0.00724562		0.00525674		0.00723802		0.00506137		0.0213407		0.0106479		0.0180945		0.00789458		0.00469795		0.0054079
0.00829074		0.00456278		0.0075254		0.00616815		0.00665201		0.0049398		0.0207457		0.0168888		0.0183574		0.00868651		0.00544435		0.00500448
0.00879481		0.00603046		0.00723227		0.00625349		0.00655722		0.00586506		0.0240207		0.0123784		0.0228646		0.00753711		0.00454387		0.0054206
0.00820527		0.00647938		0.00798344		0.00612356		0.00757303		0.00585981		0.0219197		0.0141345		0.015112		0.00696564		0.00616704		0.00486212
0.00798509		0.00546315		0.00761921		0.00576424		0.00699095		0.00432798		0.0232638		0.0173481		0.01705		0.00709752		0.00646553		0.00580178
0.00651025		0.00582569		0.00808632		0.00642655		0.00736516		0.0044071		0.0204376		0.0151521		0.0170443		0.0078097		0.00585083		0.00504448
0.00654602		0.0069557		0.00625085		0.00567567		0.00693036		0.00606013		0.0200743		0.0168273		0.0221475		0.00985342		0.00643877		0.00552766
0.00540295		0.00627545		0.00757221		0.00599953		0.00542914		0.00610195		0.0170411		0.0148738		0.0191924		0.00773175		0.00647067		0.0048418
0.00491404		0.00510288		0.00796091		0.00623484		0.00596795		0.00537053		0.0176127		0.0132149		0.0163084		0.008789		0.00647396		0.00524516
0.00675805		0.0054305		0.00606519		0.00656673		0.00726559		0.00645672		0.0148697		0.0113009		0.0183576		0.0100181		0.00643529		0.00547853
0.00637592		0.0058487		0.00894216		0.00606682		0.00575826		0.00546629		0.0152594		0.0115264		0.022558		0.00669976		0.00694023		0.00602105
0.00623567		0.00639478		0.00630143		0.00598215		0.00645715		0.00597626		0.0201658		0.0129956		0.0208384		0.00811611		0.00744582		0.00454603
0.00523453		0.00793591		0.00742454		0.00570894		0.00677884		0.0055773		0.0184845		0.0117109		0.0129933		0.0118389		0.00576609		0.00537935
0.00682978		0.00794492		0.00658104		0.00502631		0.00604107		0.00526231		0.019247		0.0122255		0.018572		0.0118471		0.00648814		0.00548728
0.00520866		0.00551359		0.00894755		0.00682317		0.00550023		0.00562895		0.0236		0.0121193		0.0174979		0.00928129		0.00436257		0.0068157
0.00515821		0.00586396		0.00788694		0.00654869		0.00546932		0.00605295		0.0249096		0.0164851		0.0181431		0.0109903		0.00630524		0.00561911
0.00715519		0.00563146		0.00653128		0.00642441		0.00724099		0.00591051		0.0181924		0.0126316		0.0176687		0.0112108		0.00639618		0.00594672
0.0070634		0.00582849		0.00812621		0.00667563		0.00648358		0.00579517		0.0190477		0.0162165		0.0153505		0.0102834		0.00454175		0.00565751
0.0055454		0.00602169		0.010052		0.00673534		0.00520178		0.00457847		0.0243443		0.0137896		0.0178237		0.00971312		0.00601715		0.0049059
0.00585555		0.00856522		0.00832562		0.00623575		0.00642944		0.00605558		0.023115		0.0147495		0.0199878		0.0103732		0.00579508		0.00461244
0.00593781		0.0077594		0.00876255		0.00645054		0.00447708		0.00508745		0.0217122		0.0151131		0.0181923		0.00810173		0.00746001		0.00614974
0.00649864		0.00615227		0.00901422		0.00565433		0.0052628		0.00503086		0.0205876		0.0158731		0.0166524		0.00884609		0.0063207		0.00573453
0.00669667		0.00591505		0.00723244		0.00632946		0.00558278		0.00558447		0.0212993		0.0141906		0.0170615		0.0103191		0.00514202		0.00480177
0.00621172		0.0071631		0.00692272		0.00601188		0.00592715		0.00670218		0.021571		0.0121156		0.0172379		0.0083834		0.00724575		0.00624068
0.00732178		0.0062639		0.00710843		0.00796488		0.00523828		0.00612464		0.0178892		0.0142675		0.020011		0.00762665		0.00791225		0.00538539
0.00594666		0.00729783		0.00767002		0.00762552		0.00534216		0.00503171		0.0198719		0.00962439		0.0121669		0.00931372		0.00581109		0.00708202
0.00629742		0.00731179		0.00812023		0.00789922		0.0060495		0.00508805		0.0185578		0.0165049		0.0139367		0.00977328		0.00703602		0.00565699
0.00741443		0.00513966		0.00948494		0.00835324		0.00609008		0.00672628		0.0191119		0.0130325		0.0122188		0.00923024		0.0051421		0.00589243
0.00661316		0.00646466		0.00724007		0.00858232		0.00660937		0.00574216		0.0190705		0.0144512		0.0151337		0.00966111		0.00571328		0.00740771
0.00584278		0.00645485		0.00793529		0.00810447		0.00660684		0.00429716		0.0194081		0.011574		0.0206149		0.00872581		0.00596482		0.00507337
0.00620661		0.00506239		0.00945011		0.00737735		0.00741339		0.00567002		0.0237928		0.0133857		0.0201394		0.00871332		0.0052511		0.00570316
0.00649526		0.00498868		0.00807985		0.00700633		0.00788314		0.00573584		0.0232053		0.011191		0.0150019		0.00668938		0.00556859		0.00445752
0.00526361		0.00741684		0.00861215		0.00744631		0.00714744		0.00549105		0.022459		0.0142018		0.0221474		0.00952997		0.00728114		0.00743199
0.0054554		0.00831103		0.00813869		0.0063272		0.00604703		0.00552023		0.0227829		0.0138873		0.0176602		0.00729957		0.00840218		0.0054017
0.00539936		0.00704101		0.0067068		0.0071998		0.00731962		0.00495129		0.0223524		0.0155062		0.0142427		0.011712		0.00726333		0.00783466
0.00482767		0.0076839		0.00815028		0.00871691		0.00601027		0.00520328		0.0233373		0.0130414		0.0139772		0.0125577		0.0054862		0.00596101
0.00750661		0.00563984		0.00789482		0.00760755		0.00641743		0.0058957		0.0125506		0.0176436		0.0177		0.0118071		0.00738346		0.00584105
0.00761698		0.00535037		0.007112		0.00735102		0.00616361		0.00576061		0.0186494		0.0148856		0.0130209		0.00908594		0.00538657		0.00556103
0.00754386		0.00740511		0.00722577		0.00855492		0.00617079		0.00540955		0.0194455		0.0103594		0.0138965		0.00980796		0.00538303		0.00772067
0.00711303		0.00740335		0.00846448		0.00785356		0.00527076		0.00449112		0.0155851		0.0154707		0.0202926		0.00989301		0.00732616		0.00815288
0.00508164		0.00696001		0.00667826		0.00923015		0.0051146		0.00531165		0.0164772		0.0119632		0.0174999		0.00856311		0.00559617		0.00554965
0.00552319		0.00732135		0.00995373		0.00737597		0.00477649		0.00599746		0.0182425		0.0122022		0.0184812		0.00909663		0.00414236		0.00793142
0.00574889		0.00541701		0.00695106		0.00624594		0.00494333		0.00552552		0.0192166		0.0146197		0.0142632		0.00793969		0.00527022		0.00699579
0.00590813		0.00784284		0.0106937		0.00544463		0.00568301		0.00548554		0.0228329		0.0145969		0.0140172		0.00763196		0.0062627		0.00821992
0.00607365		0.00753374		0.0103773		0.00561348		0.00588147		0.00409358		0.0243015		0.0156851		0.0183518		0.0089415		0.00441636		0.00613124
0.00549714		0.00693072		0.00615842		0.00662902		0.00580189		0.00428368		0.0101246		0.00999131		0.0170468		0.00852289		0.00700743		0.00599276
0.00540914		0.00641913		0.00815259		0.0063406		0.00500718		0.00620568		0.0162348		0.0191604		0.0130723		0.00685542		0.00837805		0.00512488
0.00588176		0.00458737		0.0101272		0.00612806		0.00697031		0.0073914		0.0201665		0.0135717		0.015771		0.00871055		0.00660849		0.00559891
0.00564523		0.00435895		0.00704585		0.00611883		0.00527609		0.00555275		0.0184016		0.0117743		0.0161999		0.00858013		0.00697587		0.0059168
0.00452821		0.00671546		0.00698215		0.00554117		0.00551428		0.00539241		0.0128849		0.0119335		0.013859		0.00721689		0.00750379		0.00581943
0.00491429		0.00650956		0.00793243		0.00671248		0.00756389		0.00612748		0.0124121		0.0149042		0.0168599		0.00710849		0.00791367		0.00605813
0.00625168		0.00464739		0.00795629		0.00661825		0.00627784		0.00567481		0.0195428		0.00989502		0.0169743		0.00788624		0.00843655		0.0059214
0.00640062		0.00452697		0.00871119		0.00496027		0.00624785		0.00614503		0.0181282		0.0107257		0.0133628		0.00978529		0.00757851		0.00624411
0.00726251		0.0048685		0.00822818		0.00499726		0.00646649		0.00652295		0.0208849		0.0157266		0.0110194		0.00806917		0.00805493		0.00730497
0.00690705		0.00485164		0.0075431		0.00658857		0.00579002		0.00588426		0.0209833		0.0130852		0.0119339		0.00835956		0.00945838		0.00600443
0.00694763		0.00569325		0.00695032		0.00646792		0.00759197		0.00612381		0.0161701		0.00953847		0.0138607		0.00839584		0.00594097		0.00611159
0.00701365		0.00496206		0.00736689		0.00844731		0.00724045		0.00669482		0.0218901		0.0153407		0.0124243		0.00748002		0.0077282		0.00675844
0.00563134		0.00627032		0.00715595		0.00884252		0.00748239		0.00725347		0.0193778		0.0155052		0.0120637		0.00775209		0.00771289		0.00539608
0.00571248		0.00630236		0.00672713		0.0082487		0.00735205		0.00593999		0.0188642		0.0102979		0.0125079		0.00667504		0.00661066		0.0062822
0.00674164		0.00581338		0.00600666		0.0087561		0.00698175		0.0066532		0.0197181		0.0146684		0.0166221		0.00704061		0.00846345		0.00714661
0.00667479		0.00462745		0.00875764		0.0080387		0.00627977		0.00593259		0.0224344		0.0102233		0.0195213		0.00830687		0.00571872		0.00678573
0.00683825		0.00430422		0.00891061		0.00780465		0.00643449		0.00570713		0.0174646		0.0134174		0.0127555		0.00738193		0.00736148		0.00648307
0.00677537		0.00498695		0.00784797		0.00767256		0.00573885		0.00672467		0.0165951		0.00971281		0.0128452		0.00615704		0.00833797		0.00619021
0.00746888		0.00523073		0.00911005		0.00785837		0.00567271		0.00584868		0.0210153		0.0119034		0.01573		0.00710585		0.00783373		0.00607203
0.00731074		0.00518314		0.0062419		0.00695669		0.00604322		0.00664548		0.0190158		0.0117891		0.0176403		0.00807883		0.00569733		0.00618747
0.00520314		0.00559264		0.00705969		0.00634765		0.00641673		0.00669839		0.0175559		0.00994419		0.0181473		0.00801179		0.00756987		0.00632844
0.00544512		0.00571459		0.00579268		0.00574793		0.00589489		0.00650699		0.0215556		0.0105039		0.0186034		0.00754234		0.00812026		0.006077
0.00578644		0.00542001		0.00739844		0.00588105		0.00629729		0.00712687		0.0203734		0.0099633		0.0139806		0.0078956		0.00747565		0.00465389
0.00563855		0.00494814		0.00732588		0.00649539		0.00641881		0.00634726		0.0159244		0.00979685		0.0138393		0.00663614		0.00567725		0.00411617
0.00520328		0.00507655		0.00587513		0.00599136		0.00447398		0.00535533		0.0175525		0.0133072		0.014779		0.00610825		0.00631988		0.00367649
0.00523587		0.00596022		0.00647859		0.00818131		0.00425779		0.00545734		0.0161911		0.0128959		0.0158245		0.00707478		0.00693914		0.00490478
0.00644298		0.00637193		0.00599511		0.00796413		0.00501876		0.00593611		0.0172282		0.0105874		0.0175438		0.00944723		0.00722457		0.00490727
0.00683065		0.00590206		0.00583644		0.00846523		0.00433761		0.00557808		0.0186536		0.0120255		0.0182276		0.00783919		0.0068401		0.00604559
0.00732809		0.00693183		0.00630219		0.00786384		0.00488984		0.00640869		0.0165912		0.0101259		0.0213595		0.00761954		0.00585713		0.00599067
0.00632465		0.00458855		0.00629372		0.009469		0.00503009		0.00542412		0.0106281		0.0113636		0.0206459		0.00845479		0.00675007		0.00619082
0.00616935		0.00470333		0.00639201		0.00896131		0.00611643		0.00697343		0.0191267		0.0117135		0.0230322		0.00839139		0.0075781		0.00588367
0.00623999		0.00510286		0.00766674		0.00839853		0.0060033		0.00692336		0.0205319		0.0107134		0.0227144		0.0067717		0.00737267		0.00602053
0.00687608		0.00551642		0.00832205		0.00885152		0.00546237		0.00795258		0.0180322		0.0118857		0.0186903		0.00665885		0.00655872		0.00576297
0.00601136		0.00641535		0.00692847		0.00520772		0.00555486		0.00662279		0.017522		0.0111529		0.0195101		0.00825668		0.00596723		0.00586328
0.00596165		0.00799696		0.00714497		0.00525315		0.00501167		0.00503682		0.0190171		0.0102296		0.0226183		0.0088083		0.00667447		0.00591488
0.00627251		0.00620103		0.00536994		0.00529262		0.0048111		0.00662254		0.0177972		0.0099199		0.0175639		0.0089859		0.00670464		0.00577881
0.00614918		0.00808451		0.00671605		0.00515843		0.00632623		0.00652616		0.0172302		0.00890426		0.0155166		0.00887851		0.00725488		0.00528474
0.00587635		0.00560822		0.00555323		0.00855003		0.00647254		0.00721128		0.0169971		0.00899046		0.0180396		0.00924786		0.00603825		0.00606434
0.00581196		0.00595703		0.0083624		0.00826064		0.00635651		0.00741293		0.0196069		0.016373		0.0167443		0.00937762		0.00559269		0.00510706
0.00690325		0.00559052		0.00609167		0.00638269		0.00634968		0.00569424		0.0195681		0.0136495		0.0170414		0.0092258		0.00683478		0.00484352
0.00689917		0.00565214		0.00580894		0.00622941		0.00516306		0.00651917		0.0185959		0.011547		0.017243		0.0101439		0.00714498		0.00627698
0.00675599		0.00517955		0.00550025				0.00518014		0.00670388		0.018689		0.00953008		0.0173384		0.00773953		0.00646186		0.00622594
0.00700331		0.00613442		0.00586358				0.00530108		0.00537673		0.0175751		0.0170631		0.0142094		0.00833914		0.00487546		0.0075277
0.00564175		0.00560218		0.00852367				0.00561081		0.00706949		0.0186554		0.0106383		0.0168203		0.00876813		0.00670868		0.0080173
0.00539618		0.0051085		0.00645538				0.00585595		0.00816021		0.0197839		0.0106613		0.0170836		0.00865507		0.00613356		0.00848322
0.00540523		0.00642302		0.00591485				0.00555602		0.00545077		0.0199424		0.0154499		0.014276		0.0103311		0.00555352		0.00833831
0.00543602		0.00567491		0.00946599				0.00475123		0.00513095		0.0155371		0.0139703		0.0109772		0.0105261		0.00578095		0.00680504
0.00495932		0.00524325		0.00595371				0.00452214		0.00636275		0.0162731		0.0145336		0.0105839		0.0082684		0.00553213		0.00645746
0.00477274		0.00622938		0.00534377				0.00449942		0.00780488		0.0174546		0.00850444		0.0166324		0.00848212		0.00644495		0.00626335
0.00583038		0.0052818		0.0089627				0.00464784		0.00599812		0.0190857		0.00933574		0.0197708		0.00819946		0.00718471		0.00612829
0.00585072		0.00539667		0.00573555				0.00493911		0.005237		0.0169792		0.0145771		0.0212802		0.00857021		0.00593665		0.00647785
0.00494097		0.00487666		0.00913031				0.00473835		0.00694476		0.0232869		0.0140233		0.0188984		0.00952058		0.00592254		0.00622927
0.00516195		0.00657532		0.00696818				0.00530229		0.00578831		0.01849		0.0137866		0.0165948		0.00943272		0.00649727		0.00688046
0.00571541		0.00605549		0.00774549				0.00545847		0.00652835		0.0170784		0.0105342		0.0170941		0.00803717		0.00570331		0.0068722
0.0059222		0.00549591		0.00888598				0.00483375		0.00730892		0.0151893		0.0111124		0.0155333		0.00811344		0.00570531		0.00830604
0.00734883		0.00566878		0.00592596				0.0050166		0.00661432		0.0156475		0.0133791		0.012137		0.00808439		0.00579123		0.00794244
0.00719979		0.00639086		0.00595804				0.00534724		0.00700342		0.0197901		0.0150692		0.0119039		0.00811254		0.00569157		0.00684054
0.00660057		0.0070179		0.0073622				0.00517073		0.00787788		0.0183236		0.0149786		0.0176195		0.00957806		0.00657212		0.00656683
0.00648488		0.00720355		0.00535381				0.00517428		0.00631186		0.0218938		0.0157187		0.0197566		0.00932878		0.00844694		0.00676205
0.00683867		0.00616344		0.00697191				0.00568115		0.00560032		0.018067		0.0158569		0.0132447		0.00888951		0.00535494		0.00606184
0.00634608		0.0055078		0.00790025				0.00612338		0.00659354		0.0238843		0.0159173		0.0149876		0.00803201		0.00733198		0.00751702
0.0062312		0.0075202		0.00689322				0.00481222		0.00755895		0.0249451		0.0128593		0.0149937		0.00812305		0.00681529		0.00719795
0.0060599		0.00529206		0.00678738				0.00559494		0.00564533		0.0165617		0.0132493		0.0172864		0.00926783		0.00614135		0.00578142
0.00687511		0.00519091		0.0061875				0.00639954		0.00654396		0.0175047		0.0154384		0.0130596		0.0101171		0.00524922		0.00550963
0.00710091		0.00633026		0.00583731				0.00504457		0.0080345		0.0163113		0.0168825		0.0155706		0.0101194		0.0069813		0.00525273
0.00903778		0.00661879		0.00649916				0.00594894		0.00666962		0.0170646		0.0169074		0.0189628		0.0107279		0.00705938		0.00650087
0.00641295		0.00614719		0.00795825				0.00696341		0.00654673		0.0196652		0.015877		0.0171084		0.00973064		0.00618198		0.00603684
0.00660466		0.00600183		0.00675357				0.00473287		0.00586183		0.0188093		0.0160207		0.0180188		0.00777477		0.00628207		0.00470398
0.00706282		0.00648575		0.00757814				0.00641119		0.00632995		0.0141669		0.0160198		0.0171991		0.00731882		0.00586977		0.00519214
0.00635926		0.00551207		0.00778705				0.00637041		0.00576743		0.0144649		0.0160033		0.0129607		0.00773698		0.0074963		0.00673698
0.00670361		0.00667016		0.00663838				0.00571518		0.00631103		0.0109533		0.0155153		0.0121047		0.00743263		0.00714294		0.00719584
0.00899301		0.00567478		0.00798519				0.00750781		0.00609979		0.0113615		0.0152372		0.0154828		0.00811496		0.00527741		0.00651863
0.00863725		0.00585433		0.00823591				0.00580426		0.00796114		0.0148464		0.0141515		0.015834		0.00986451		0.00636071		0.00622793
0.00875595		0.00508061		0.00877062				0.00610805		0.00524793		0.0160211		0.0106974		0.0141941		0.00819372		0.00605442		0.00562545
0.0097188		0.0052453		0.00814706				0.00643763		0.00502123		0.0206954		0.012839		0.0158975		0.00790785		0.00717113		0.00617454
0.00925509		0.0068712		0.00628286				0.00570433		0.00789178		0.0205789		0.0140113		0.0175499		0.00927509		0.00761686		0.00641794
0.00656188		0.00620826		0.00677225				0.00544245		0.00531196		0.02275		0.0120546		0.0175414		0.0098049		0.00625613		0.00584996
0.00678124		0.00624289		0.00841745				0.00718484		0.00524494		0.0238789		0.0130477		0.0195311		0.00959948		0.00755126		0.00503383
0.0057536		0.00676299		0.00892284				0.005445		0.00510386		0.0182421		0.014584		0.0213084		0.0093638		0.00627721		0.00500774
0.00741913		0.00544272		0.00661232				0.00653074		0.00570848		0.0171138		0.0150488		0.0161551		0.00959873		0.00796682		0.00481109
0.00756722		0.00621449		0.00633358				0.0062766		0.00609549		0.0153979		0.0136954		0.0166927		0.00875599		0.00629771		0.00470358
0.00749183		0.00572826		0.00622991				0.00517662		0.00613345		0.018284		0.0167688		0.012902		0.0117603		0.0075372		0.00743541
0.00759776		0.0058628		0.0064277				0.00595175		0.00596009		0.0191578		0.0119992		0.0148695		0.0105633		0.00673083		0.00736522
0.00760157		0.00671074		0.00870783				0.00491525		0.0061784		0.020142		0.0130061		0.0168428		0.0068134		0.00681409		0.00456492
0.00737275		0.00627564		0.00797583				0.00547361		0.0069498		0.0179031		0.0110625		0.0177218		0.00657253		0.00798366		0.00540471
0.00782852		0.00698051		0.0063242				0.00532551		0.0060572		0.0175969		0.0134954		0.0142895		0.00929439		0.00684456		0.00436157
0.00713165		0.00546792		0.00599166				0.00452387		0.00523498		0.0172783		0.011637		0.0135615		0.00953978		0.00659394		0.00454857
0.00732368		0.00731668		0.00806473				0.0058337		0.00538678		0.0177635		0.0125907		0.0181077		0.00953044		0.00644775		0.00445144
0.00696752		0.00574638		0.00882975				0.00572016		0.00525794		0.0182885		0.0107219		0.0194897		0.00974802		0.00680295		0.00451616
0.00752058		0.00602558		0.00630492				0.00599574		0.00602278		0.0183459		0.00938489		0.0173146		0.00811426		0.00470763		0.00553403
0.00685872		0.00498446		0.00585558				0.00600761		0.00508882		0.0135414		0.013404		0.0176001		0.00608496		0.00484134		0.00631798
0.00753447		0.0056073		0.00706948				0.00473523		0.0052639		0.0199666		0.0133518		0.020816		0.00644457		0.00490492		0.00460308
0.00750381		0.00710646		0.00683612				0.00674026		0.00504044		0.0203057		0.0130475		0.0131813		0.00843989		0.00523836		0.00593601
0.00876664		0.00588599		0.0098457				0.00498163		0.00576505		0.0197256		0.0115221		0.0151467		0.00869805		0.00535562		0.00750218
0.00912435		0.00558588		0.0104506				0.00669068		0.00596274		0.0211809		0.0111648		0.0154841		0.00955992		0.00584788		0.00721015
0.00610847		0.00532793		0.0060006				0.00564471		0.00580412		0.021814		0.00826905		0.0160613		0.0101729		0.00602053		0.00662007
0.0086424		0.0056415		0.00900798				0.00528073		0.00460726		0.0226509		0.0132001		0.018276		0.00794179		0.00835353		0.00542531
0.00857719		0.00688586		0.00894167				0.00525664		0.00673283		0.017987		0.0126837		0.0195271		0.00690925		0.00776943		0.00524868
0.00646246		0.00590801		0.00728714				0.00539108		0.00592107		0.0217189		0.0125186		0.0115633		0.00937737		0.00607216		0.00811698
0.00611037		0.00529518		0.00627967				0.00487843		0.00520614		0.0179681		0.0133524		0.0194202		0.00883777		0.00540505		0.00624419
0.00679122		0.0064011		0.00686172				0.0051275		0.00514461		0.0239494		0.00910217		0.012489		0.0081634		0.00825274		0.00819904
0.00664577		0.00672047		0.00680894				0.00543753		0.00628225		0.0229775		0.00910153		0.0115377		0.00662422		0.00795579		0.00656908
0.00709032		0.00457159		0.00741069				0.00453149		0.00589361		0.0190608		0.0146516		0.0120934		0.00636648		0.00579257		0.00544293
0.00638486		0.0042128		0.00743035				0.00560487		0.00516506		0.0165909		0.0166356		0.0135732		0.00676167		0.00512914		0.00699506
0.00693762		0.0067998		0.0085662				0.00519234		0.00504797		0.0202281		0.0158521		0.015503		0.00731258		0.00606358		0.00794166
0.00688606		0.00691753		0.00793875				0.00505293		0.00509082		0.0158185		0.014823		0.020935		0.00704349		0.00631189		0.00670031
0.00658317		0.00697588		0.00838929				0.00702851		0.00491797		0.0176376		0.0133152		0.0156342		0.00746684		0.00523608		0.00728677
		0.0050763		0.00618				0.00507207		0.00492297		0.0183966		0.0133987		0.0117923		0.00729887		0.00538145		0.00672549
		0.00563923		0.00619696				0.00518683		0.00545196		0.0171293		0.0125141		0.013914		0.00888473		0.00585935		0.00589983
		0.0056535		0.00635788				0.00688084		0.00554137		0.0135077		0.0129401		0.0118769		0.00789844		0.00561332		0.0060354
		0.00614996		0.00540495				0.0046941		0.00451847		0.0172443		0.0138076		0.0204422		0.0077151		0.00462499		0.00630387
		0.00477176		0.00538019				0.00697585		0.00528916		0.0174032		0.0125274		0.0156806		0.00773841		0.00487818		0.00701836
		0.00598478		0.00516222				0.0065533		0.00572107		0.0220309		0.0128142		0.016839		0.00813696		0.00753356		0.00743814
		0.00564713		0.00606454				0.00685151		0.00509494		0.0180381		0.0125064		0.0212895		0.00840577		0.00797118		0.00599312
		0.00544383		0.00530585				0.00725978		0.00585183		0.017641		0.0138359		0.0169981		0.00838855		0.00812253		0.00466196
		0.0057182		0.0056209				0.00594226		0.00549703		0.0187202		0.015751		0.0140156		0.00881918		0.00758087		0.00579961
		0.0054054		0.00508016				0.00664175		0.00631142		0.0174053		0.0147191		0.0114153		0.00846325		0.00834267		0.00493849
		0.00574546		0.00537035				0.00784543		0.00674839		0.0183358		0.0145109		0.0229056		0.00795822		0.00891505		0.00667435
		0.00541279		0.00579662				0.00583594		0.005364		0.0182153		0.0130087		0.0214575		0.00745723		0.00555347		0.00465462
		0.00595106		0.00497383				0.00693897		0.00554235		0.0238711		0.0138049		0.0241388		0.00706393		0.00572706		0.00691157
		0.0047657		0.00625553				0.00623437		0.00442868		0.0177523		0.0110925		0.0229641		0.00698261		0.00534062		0.00557804
		0.00478357		0.00538947				0.00487469		0.00604411		0.0204335		0.0110129		0.0234328		0.00728549		0.00581157		0.00472263
		0.00493923		0.00483175				0.00522503		0.00526418		0.018429		0.0113592		0.0241537		0.00774226		0.00622902		0.00480486
		0.00533486		0.00458567				0.00507983		0.00505933		0.0204481		0.0117362		0.0122273		0.00683181		0.00644228		0.00595463
		0.00556026		0.00659201				0.00516026		0.00497766		0.0192515		0.0110362		0.020832		0.00736808		0.00724888		0.00598387
		0.00573534		0.00598217				0.00610451		0.00498869		0.0218565		0.0114468		0.017622		0.0110311		0.00597993		0.00598782
		0.00534162		0.00562217				0.00470267		0.00549272		0.0190806		0.0155518		0.010549		0.0110642		0.00609984		0.00545441
		0.00551045		0.00565419				0.00495679		0.00479412		0.0207416		0.0155054		0.0116249		0.0109589		0.00601476		0.00490176
		0.00607259		0.0050126				0.00481542		0.0055352		0.0193113		0.0129215		0.0149053		0.0105056		0.00616194		0.00608295
		0.00658525		0.00601078				0.00500267		0.00573194		0.0185231		0.0119734		0.0116134		0.00730416		0.00709815		0.00536156
		0.00666231		0.00552023				0.00464386		0.00544898		0.0219802		0.0104319		0.0260708		0.00652418		0.00769506		0.00525267
		0.00582014		0.00543133				0.00458176		0.00521111		0.0188114		0.0125974		0.0227019		0.00675112		0.00918144		0.00530395
		0.00647114		0.00616418				0.00490146		0.00522642		0.0205616		0.00964829		0.0250733		0.00684915		0.00904525		0.0063141
		0.00675308		0.00533909				0.00499016		0.00499525		0.0208809		0.00891201		0.0224265		0.0067832		0.00640672		0.00662811
		0.00533838		0.00645117				0.00502103		0.00464984		0.0219901		0.0109999		0.0205966		0.00922958		0.0069054		0.00502733
		0.00553488		0.00514501				0.00529702		0.00550098		0.0201185		0.011787		0.0243237		0.00850446		0.00612003		0.00532744
		0.00672909		0.00599364				0.00558095		0.00599788		0.0214498		0.00998546		0.0218896		0.00675136		0.00643182		0.00557748
		0.00583467		0.00638053				0.00536949		0.00508978		0.0132767		0.0119962		0.0182339		0.00859254		0.00773705		0.00552727
		0.00542607		0.00651751				0.00692986		0.00597374		0.0207436		0.0111575		0.0214698		0.00864909		0.00966947		0.00656047
		0.0059298		0.00586451				0.00455945		0.00673906		0.0219805		0.0101554		0.0185812		0.00908362		0.00840925		0.00711549
		0.00573642		0.00476738				0.00457207		0.00643455		0.0169805		0.0097719		0.0180547		0.00950683		0.00757121		0.00569233
		0.00593627		0.00623662				0.00423721		0.00643512		0.017928		0.0177481		0.0242583		0.00947987		0.00705801		0.00510376
		0.0060203		0.006668				0.00433209		0.00571655		0.0223066		0.0096169		0.0122512		0.00940585		0.00676862		0.0050208
		0.00624101		0.00460784				0.00620461		0.00566299		0.0252861		0.0143426		0.0135539		0.00950107		0.00723778		0.00510919
		0.00616897		0.00666236				0.00548816		0.00646012		0.0230359		0.0152109		0.0126063		0.00998933		0.00631195		0.00707447
		0.00706525		0.0046437				0.00468575		0.00658493		0.0242159		0.0162955		0.0247341		0.0101753		0.0068601		0.00566515
		0.00720244		0.00558976				0.00507382		0.00607007		0.0220445		0.0177561		0.0232275		0.0108181		0.00599547		0.00606316
		0.00605853		0.00708666				0.00621123		0.00663253		0.0228366		0.0138768		0.0192876		0.011633		0.00586962		0.00507682
		0.00604621		0.00627114				0.00661835		0.00570873		0.0218693		0.0184136		0.0216433		0.0111923		0.00617448		0.0050424
		0.0056748		0.00681016				0.00452907		0.0058537		0.0212616		0.0139375		0.0248518		0.0103376		0.00639244		0.00548108
		0.0062094		0.00633857				0.00523103		0.00560432		0.0213668		0.0177696		0.0186524		0.00986445		0.00647639		0.00693462
		0.00557484		0.0050902				0.00555989		0.00566497		0.0174146		0.0100984		0.0144826		0.00986544		0.00675382		0.00557496
		0.00641317		0.0064714				0.00638045		0.00572422		0.0188417		0.0112518		0.0208253		0.00878774		0.00636364		0.0051759
		0.00611532		0.0048956				0.00674418		0.00732254		0.0145511		0.015202		0.020662		0.00538625		0.00593362		0.00502602
		0.00584058		0.00521933				0.00598333		0.00732134		0.0167631		0.0118638		0.0224882		0.00890439		0.00575121		0.00497097
		0.005155		0.00721934				0.00592261		0.00564363		0.0161215		0.0110603		0.0213758		0.00690624		0.0057363		0.00560187
		0.00564455		0.00560718				0.00557883		0.00567582		0.0208007		0.0120035		0.0165833		0.00710349		0.00671161		0.00517545
		0.00534923		0.00488583				0.00523603		0.00697854		0.0199659		0.0113705		0.0181204		0.00815874		0.00606717		0.0048592
		0.00610202		0.00561571				0.00559494		0.00708374		0.0186114		0.0115429		0.0185365		0.00860427		0.00508447		0.00590738
		0.00793157		0.0081568				0.00580033		0.0062688		0.0187009		0.0142416		0.022223		0.00763389		0.00491169		0.00530858
		0.00779172		0.00632712				0.00559351		0.00635037		0.0187369		0.0150855		0.0203845		0.00752516		0.00598099		0.00650772
		0.0064526		0.00624957				0.00542133		0.00580327		0.0175839		0.0191383		0.0177564		0.0073168		0.00559898		0.00532197
		0.00699739		0.00587933				0.00485131		0.00573094		0.0147408		0.0199504		0.0179854		0.00711597		0.00582715		0.00663851
		0.00627126		0.00504037				0.00504983		0.0068484		0.0139696		0.0162001		0.0204968		0.00735972		0.00546826		0.00509501
		0.00645943		0.00596509				0.00613734		0.0067336		0.0144052		0.0177967		0.0132273		0.00796321		0.00549965		0.00518639
		0.00538989		0.0053201				0.00630811		0.00547369		0.0139058		0.0136343		0.0167376		0.0081711		0.00683487		0.00598568
		0.00539028		0.00508847				0.00538216		0.00595985		0.0222239		0.0145551		0.0196804		0.00779263		0.0066821		0.00550728
		0.00540774		0.00586215				0.00552551		0.00642538		0.0208193		0.0158282		0.0109328		0.00727961		0.00814298		0.00555568
		0.00632812		0.00796401				0.00591552		0.00674969		0.0205512		0.0130098		0.0130059		0.00772475		0.0079586		0.00604038
		0.00693826		0.00611403				0.0062491		0.00697746		0.0198768		0.0160205		0.0134848		0.00758946		0.00697407		0.00550038
		0.00621821		0.00630311				0.00629823		0.00665013		0.0177296		0.0146938		0.0153958		0.00962218		0.00727001		0.00447851
		0.00603744		0.00599846				0.00609196		0.00653495		0.0172587		0.0154424		0.014144		0.00966359		0.00637433		0.00437268
		0.00653759		0.00515794				0.00556883		0.00673473		0.0158098		0.0147158		0.0146064		0.00854135		0.00636241		0.00464971
		0.00666696		0.00747246				0.0055582		0.0059187		0.017063		0.0151578		0.0108376		0.00856854		0.0059676		0.00457181
		0.00684897		0.00752983				0.00507702		0.00667901		0.0181976		0.0126191		0.0145136		0.00860864		0.00577595		0.0073685
		0.00544253		0.00839602				0.0054556		0.00659586		0.0189714		0.0163702		0.0118985		0.00945593		0.00680368		0.00584116
		0.00557118		0.0077814				0.0075557		0.00645016		0.0261346		0.0123712		0.0129105		0.00961275		0.00633246		0.00651212
		0.00561257		0.00566391				0.00835619		0.00527516		0.0239555		0.0140047		0.0178074		0.00731389		0.00542353		0.00642564
		0.00562209		0.00782456				0.00744932		0.00474839		0.0252577		0.00873321		0.0152544		0.00691451		0.00547606		0.00641083
		0.00572193		0.00718991				0.00750479		0.00540007		0.0267661		0.0213641		0.0148279		0.00836784		0.00683338		0.00461775
		0.00600737		0.00975923				0.0086151		0.00535198		0.0219153		0.0193239		0.0153895		0.00876492		0.00705384		0.00478045
		0.00535598		0.00534999				0.004248		0.00588353		0.0210823		0.0158022		0.0112933		0.0101506		0.00670417		0.00611778
		0.00525369		0.00742662				0.0043004		0.0054031		0.0255237		0.0140894		0.0167328		0.00971602		0.00606995		0.00572296
		0.00658341		0.00758654				0.00494051		0.00549668		0.0277964		0.016478		0.0130272		0.00872287		0.00845161		0.00617442
		0.00672339		0.00765772				0.00532042		0.00555738		0.0125705		0.0133122		0.0138635		0.00887168		0.00827298		0.00614182
		0.00560879		0.00958547				0.00516299		0.00573309		0.0171613		0.0115142		0.0132858		0.00991336		0.00733263		0.00521922
		0.00596579		0.00589315				0.00617278		0.00605854		0.0164611		0.0145006		0.0142105		0.00813927		0.00605495		0.00591042
		0.00560028		0.00678632				0.00629003		0.00545311		0.0191997		0.0161257		0.0162069		0.00827939		0.00574982		0.00596795
		0.00605789		0.00682516				0.00540604		0.00486869		0.0211464		0.0117185		0.0164294		0.00793483		0.00593673		0.00650266
		0.00581935		0.00707673				0.0053064		0.00467129		0.023332		0.0116097		0.0165674		0.00821358		0.00599937		0.00654358
		0.00592104		0.00847969				0.00546263		0.00601072		0.0222506		0.0153569		0.0152664		0.0076949		0.00590394		0.00493543
		0.00599419		0.00863088				0.0061599		0.00551745		0.0219523		0.00940029		0.0106344		0.00779383		0.00793856		0.0070963
		0.00577979		0.00661759				0.00433619		0.00487107		0.0231904		0.0143188		0.0160174		0.00879828		0.00833611		0.00682024
		0.00712133		0.00837614				0.00648824		0.00681723		0.0217135		0.0126203		0.0157779		0.00871308		0.00564109		0.00558157
		0.00555043		0.00832015				0.00564932		0.0068653		0.0213597		0.0160005		0.0134073		0.00746406		0.00546923		0.00538862
		0.00602296		0.00776246				0.00553371		0.0063844		0.0207412		0.0139992		0.01279		0.00816814		0.00688421		0.0056431
		0.00728292		0.00794078				0.00453696		0.00641506		0.0188483		0.0106277		0.0134498		0.0059188		0.00683049		0.00525872
		0.00457441		0.00526262				0.00394039		0.00608995		0.0203391		0.0162228		0.0136267		0.00860727		0.00649507		0.00594584
		0.00403186		0.00746188				0.00555623		0.00619742		0.0247583		0.0156961		0.0162705		0.00808969		0.00674547		0.00567559
		0.0050706		0.00443706				0.00552064		0.00664706		0.0212954		0.0149333		0.010037		0.00937151		0.00652684		0.00471625
		0.00576051		0.00496217				0.00551488		0.00644598		0.0198549		0.0135553		0.0162921		0.00741226		0.00646508		0.00471679
		0.00648523		0.00639286				0.00603154		0.00753096		0.0197696		0.0137617		0.0170761		0.00773144		0.00845779		0.00568951
		0.00583276		0.00763894				0.00495624		0.00784563		0.0189916		0.0147191		0.0145939		0.00763919		0.0082599		0.00562799
		0.0041342		0.00759167				0.00457392		0.00786324		0.0174109		0.0163923		0.0136977		0.00774497		0.00674793		0.00412299
		0.00457883		0.0080624				0.00589061		0.00507945		0.0180163		0.0104212		0.0172259		0.00885807		0.0068653		0.00405617
		0.00589429		0.00738018				0.00523342		0.00570022		0.0180735		0.015204		0.0153134		0.0084745		0.00737084		0.00686047
		0.00660037		0.00564902				0.00521398		0.00478844		0.0176734		0.0145496		0.0166013		0.00655405		0.00896443		0.00693982
		0.00477065		0.00567418				0.00528394		0.00527699		0.0218916		0.0113625		0.0207021		0.00671764		0.00915478		0.00599109
		0.0060932		0.00680449				0.00553128		0.00540832		0.0245453		0.0125623		0.0202417		0.00724071		0.00904017		0.00599823
		0.00573682		0.00493477				0.00564071		0.00535219		0.0160367		0.0151652		0.0137587		0.00737021		0.0094406		0.00668456
		0.00602672		0.0059987				0.00576888		0.00448343		0.0233345		0.0153535		0.0244653		0.00819941		0.00888577		0.0064001
		0.00604453		0.00648237				0.00570366		0.00508363		0.0156231		0.0151123		0.0170705		0.00794316		0.00673804		0.0057959
		0.00560318		0.00496958				0.00603272		0.00504508		0.0164441		0.0151212		0.0182846		0.00898568		0.00694995		0.00467457
		0.00623822		0.00851091				0.00572345		0.0046973		0.0239341		0.0135836		0.0159313		0.00924184		0.00654581		0.00513409
		0.00667351		0.0083811				0.00550048		0.00425197		0.0155089		0.0158505		0.0202175		0.0092274		0.00514779		0.0049633
		0.00659827		0.00905877				0.0057458		0.00512173		0.0258633		0.00970758		0.0168901		0.00783394		0.00487425		0.0045115
		0.00608086		0.00924187				0.00588476		0.00433002		0.0144226		0.0161244		0.0127229		0.00869938		0.00436032		0.00668339
		0.00533222		0.00809084				0.00663667		0.00526315		0.0220611		0.0112592		0.0132605		0.00811354		0.00549831		0.00646757
		0.00515883		0.00776079				0.00522109		0.00466745		0.0247774		0.0136778		0.0230857		0.0076379		0.00504831		0.00591303
		0.00550354		0.00690719				0.00488875		0.00509051		0.0144683		0.0152808		0.0233762		0.00779211		0.00518734		0.0056127
		0.00637799		0.00542853				0.00633199		0.00421771		0.0195761		0.0154253		0.021092		0.00898114		0.00423284		0.00676473
		0.00608757		0.00539409				0.00721589		0.00430871		0.0132551		0.0134657		0.013749		0.0079734		0.003984		0.00588838
		0.00586857		0.00458607				0.00599347		0.00508733		0.0228158		0.0136536		0.0205766		0.00779824		0.00526053		0.00565773
		0.0061568		0.0049157				0.00461934		0.0048538		0.0158222		0.018567		0.0249201		0.00737124		0.00523788		0.00659636
		0.00650909		0.00520421				0.00559317		0.00431617		0.0163873		0.011888		0.0247674		0.00667619		0.00404443		0.00549214
		0.00667754		0.00554234				0.00583477		0.00428928		0.0158444		0.0126583		0.0176311		0.00825344		0.00474796		0.00563304
		0.00624049		0.00518942				0.00624894		0.00469		0.0254733		0.0128084		0.0232906		0.00816472		0.00497143		0.00628102
		0.00750099		0.00579945				0.0064966		0.00458907		0.022934		0.0132234		0.0157789		0.00824685		0.00537135		0.00547797
		0.00759001		0.00582598				0.00580484		0.00492587		0.0248473		0.0210863		0.0224118		0.00798744		0.00660616		0.00520354
		0.00561386		0.00624939				0.00524962		0.00482547		0.0253542		0.0133183		0.0208082		0.00884819		0.00578629		0.00527476
		0.00483198		0.00754702				0.0066181		0.00456378		0.0240506		0.0124706		0.0132786		0.00841164		0.00620344		0.00573297
		0.00418533		0.00495317				0.00627123		0.0041041		0.0214622		0.0126637		0.020875		0.00958044		0.00563134		0.00541994
		0.00636242		0.00544377				0.00491964		0.00592815		0.022374		0.0122666		0.014683		0.00868012		0.00635701		0.00506349
		0.0066475		0.00550335				0.00504486		0.00557324		0.0217965		0.011812		0.0201932		0.00772367		0.00614843		0.00445312
		0.00662196		0.0053147				0.00521364		0.00546511		0.0258985		0.0114656		0.0166108		0.00978713		0.00524983		0.00491999
		0.00814482		0.00523781				0.00533473		0.00435037		0.0236393		0.013052		0.0167775		0.00980082		0.00652413		0.00571297
		0.00523769		0.00602702				0.00512346		0.00542625		0.0258869		0.0088417		0.0179437		0.00975273		0.00538115		0.00643973
		0.0066912		0.00604803				0.00509352		0.00566917		0.0201965		0.0122954		0.0230534		0.00807278		0.00516085		0.00653388
		0.00731463		0.00751762				0.00525758		0.00574192		0.0220117		0.00745491		0.0189059		0.00806081		0.00576687		0.00588134
		0.00753497		0.00813363				0.0055075		0.00530031		0.0205398		0.0132477		0.0184735		0.00829266		0.00677016		0.00556994
		0.00590888		0.00734367				0.00620145		0.0060189		0.0175913		0.0138716		0.0227882		0.0100328		0.00537526		0.00508297
		0.00614567		0.00994483				0.00579481		0.00483601		0.0230798		0.0149328		0.0244201		0.0093941		0.00507865		0.00482712
		0.00654985		0.00661812				0.00587227		0.00538087		0.0230995		0.0144579		0.0214907		0.0101509		0.00559904		0.00829226
		0.00658589		0.00632821				0.00574724		0.00602575		0.0210124		0.0132188		0.022217		0.00859572		0.0050902		0.00727526
		0.00520258		0.00740496				0.00636966		0.00422451		0.0143532		0.0160759		0.0216032		0.00691851		0.00539217		0.00716575
		0.00572056		0.00802298				0.00590597		0.00446396		0.0146765		0.0131072		0.0242385		0.00752455		0.00458992		0.00763125
		0.00644934		0.00774615				0.00621379		0.00570381		0.0191883		0.0139013		0.020866		0.00780137		0.00609118		0.00627478
		0.00670309		0.00517338				0.00601341		0.00438833		0.0196968		0.0107461		0.025658		0.00891348		0.00563384		0.00604533
		0.00433915		0.00498625				0.00565307		0.00615566		0.01772		0.016		0.0166576		0.00733569		0.00542093		0.00470174
		0.00680271		0.00942941				0.0054211		0.00683007		0.0207056		0.0181194		0.0217578		0.0105552		0.00447972		0.00647837
		0.00680149		0.00968206				0.00666414		0.00589239		0.0252374		0.0121798		0.0246127		0.0109442		0.00602942		0.00858337
		0.0052682		0.00712836				0.00649183		0.00485345		0.01601		0.013647		0.0223707		0.00822963		0.00591899		0.00733487
		0.00675504		0.0070515				0.00601134		0.00522174		0.0217771		0.0102516		0.0252014		0.00807659		0.00540474		0.00824553
		0.0067327		0.0095713				0.00588918		0.00484512		0.0234475		0.0181616		0.0181805		0.00918335		0.00522505		0.00886682
		0.00424722		0.00788994				0.00559855		0.00589361		0.0204642		0.0195145		0.014844		0.0104313		0.00762637		0.00639092
		0.00488335		0.00730477				0.00578286		0.00657841		0.0205423		0.0104998		0.0159905		0.00968248		0.00602729		0.00693818
		0.00620766		0.00591718				0.00613115		0.00483857		0.0146028		0.0171202		0.0178697		0.00900566		0.00642777		0.00741628
		0.00658135		0.00578634				0.00609536		0.00540224		0.0154595		0.0208534		0.0175657		0.00805933		0.00573413		0.00505257
		0.0066061		0.0081337				0.00608284		0.00497291		0.0215069		0.0152053		0.0147583		0.00871074		0.00607452		0.00575078
		0.00576785		0.00828191				0.0052328		0.00530032		0.0241289		0.0105436		0.0217713		0.00897064		0.00563286		0.0075452
		0.00580121		0.00786597				0.00627059		0.00578285		0.0191306		0.0101821		0.0230127		0.00707127		0.00527599		0.00768482
		0.00613471		0.00692204				0.00502223		0.00663762		0.0198531		0.0129626		0.0222582		0.00755042		0.00808666		0.00790642
		0.00679349		0.00606186				0.0069618		0.00525927		0.0173985		0.0120096		0.0171075		0.00599733		0.00631051		0.00596286
		0.00653848		0.0059209				0.00639513		0.00510307		0.0179971		0.00974628		0.0260945		0.00553526		0.00573897		0.00865917
		0.00642801		0.0061929				0.00703628		0.00473178		0.0186973		0.0103379		0.014829		0.00885635		0.00643393		0.00686371
		0.00652148		0.00709191				0.00706829		0.00546431		0.0200917		0.0114421		0.022415		0.00789024		0.00483563		0.00773129
		0.00586715		0.00648005				0.00772719		0.00543643		0.0173135		0.0107178		0.021539		0.00814768		0.00865138		0.00758461
		0.00550717		0.00761807				0.00564814		0.00506179		0.0155412		0.0115998		0.0233045		0.00771688		0.00465539		0.00840765
		0.00534046		0.00754152				0.00846429		0.00438257		0.0159126		0.01127		0.0225271		0.00766428		0.00464723		0.00829333
		0.00540382		0.00694555				0.00605024		0.00456243		0.0145995		0.0144161		0.0181279		0.0104612		0.00601859		0.00586772
		0.00391522		0.0072664				0.00597794		0.00484592		0.0205045		0.0131651		0.0176336		0.0100869		0.00660885		0.00632859
		0.00552405		0.00626034				0.00802904		0.00512995		0.0188878		0.0153512		0.0204927		0.00822271		0.00698555		0.00811079
		0.00571504		0.00552251				0.0060212		0.00509065		0.0211945		0.0157282		0.0152126		0.00843691		0.00597421		0.00665677
		0.00793716		0.00583147				0.00564382		0.00545862		0.025409		0.0143978		0.0140196		0.0078513		0.00552192		0.00809189
		0.00521487		0.006595				0.00570896		0.00543265		0.0201745		0.0163952		0.0188905		0.00759085		0.00827793		0.0072585
		0.00555949		0.00578021				0.00508079		0.00519937		0.019238		0.0148823		0.0228445		0.00808395		0.00553395		0.00592157
		0.00571799		0.00558382				0.00517882		0.00488083		0.0209153		0.0122518		0.0158394		0.00760491		0.00611519		0.00784148
		0.00537384		0.00674122				0.00566346		0.0047375		0.0189992		0.012708		0.0212316		0.00775467		0.00676732		0.00565423
		0.00565443		0.00731447				0.00513461		0.00576131		0.0118976		0.011547		0.0214429		0.0074897		0.00736071		0.00665539
		0.00593055		0.00624843				0.0055095		0.0055569		0.0126583		0.0111569		0.0185896		0.00783798		0.00570273		0.00597536
		0.00548673		0.00633437				0.00564691		0.00612224		0.0155098		0.0112715		0.0202467		0.00803219		0.00599562		0.00850993
		0.00599929		0.0096215				0.00553169		0.00606208		0.0146442		0.0117284		0.0204207		0.0078123		0.00755699		0.00692246
		0.00784156		0.0102333				0.00547008		0.00428881		0.0178058		0.011769		0.0194084		0.00773861		0.00623902		0.0078365
		0.00576452		0.00654238				0.00567165		0.00478797		0.0169516		0.0159879		0.0123177		0.00945256		0.00555977		0.0079744
		0.00449347		0.0103345				0.00572177		0.00456053		0.0199528		0.0141903		0.012435		0.00953235		0.00674173		0.00810488
		0.00357798		0.00794114				0.00470609		0.00486267		0.0221252		0.0165223		0.013702		0.00980275		0.00507098		0.00773034
		0.00559551		0.00847395				0.0043738		0.00550677		0.0220701		0.0151956		0.0204275		0.008946		0.00788478		0.00858256
		0.00575722		0.00793475				0.00473476		0.00503278		0.0211382		0.0159698		0.0145172		0.00912336		0.00433822		0.00718394
		0.00643448		0.00694057				0.00485304		0.005131		0.0175764		0.0176976		0.0152892		0.00934671		0.004056		0.00919798
		0.00606919		0.00750065				0.0060325		0.00632926		0.0174946		0.0188296		0.0140369		0.00925812		0.00529223		0.00797274
		0.00547521		0.00826218				0.00706672		0.00591376		0.0206052		0.0150404		0.0149161				0.00659184		0.00715014
		0.00582544		0.00713694				0.0056066		0.0054422		0.0190069		0.013238		0.0138498				0.00687173		0.00880245
		0.00648106		0.00740223				0.00573596		0.00450495		0.0187858		0.0160689		0.0196408				0.00641126		0.00722838
		0.00597452		0.00724995				0.00534917		0.00458704		0.0187473		0.0153603		0.0135124				0.00848782		0.00819028
		0.00625635		0.00813447				0.00534793		0.0055197		0.0199044		0.017093		0.0146813				0.00570944		0.00881109
		0.00579203		0.0063334				0.00505306		0.0045166		0.0179685		0.0115623		0.0124975				0.00723692		0.00577355
		0.00613271		0.00630184				0.00511117		0.00452442		0.0145847		0.0123961		0.0141282				0.00548794		0.00855566
		0.00513053		0.00571549				0.00461217		0.00459244		0.0156408		0.0124097		0.0124399				0.00651642		0.0081536
		0.00660505		0.00544371				0.00521179		0.00498684		0.0214135		0.00991045		0.0128378				0.00626928		0.00751064
		0.00559075		0.00628913				0.00654119		0.00554546		0.021865		0.0171178		0.0160688				0.00670213		0.0088476
		0.0060916		0.00521864				0.0065941		0.00584318		0.0221591		0.0178396		0.0214497				0.0057324		0.00781466
		0.00529588		0.00511655				0.00490478		0.00619274		0.0241072		0.0139248		0.020411				0.00647026		0.00743683
		0.00507161		0.00480351				0.00525857		0.0055823		0.0170681		0.0123026		0.01983				0.00770816		0.0062649
		0.00555795		0.00606702				0.00493226		0.00584166		0.0202859		0.0127029		0.0134622				0.0060061		0.00957934
		0.00562767		0.00606538				0.00523062		0.00514695		0.0145311		0.0171377		0.0204756				0.00607198		0.0093102
		0.00545101		0.00591961				0.00625897		0.00504232		0.0224067		0.0142331		0.0211209				0.00662105		0.00941673
		0.0053462		0.00746331				0.00608087		0.0060303		0.0238424		0.0137659		0.0126642				0.00706026		0.00808154
		0.00497919		0.00650047				0.00667382		0.00577816		0.0273573		0.0131947		0.0132119				0.0085156		0.0089382
		0.00626874		0.00501739				0.00641172		0.00505348		0.0266145		0.0153165		0.0166822				0.00850283		0.00783815
		0.00589894		0.00649605				0.00647712		0.00593676		0.0263684		0.0172193		0.0160052				0.0067053		0.00938635
		0.00536151		0.00550321				0.00542613		0.00560039		0.0273171		0.0166715		0.0157656				0.00798596		0.00902799
		0.00642332		0.00499491				0.00534377		0.00547044		0.0251903		0.0134404		0.021454				0.0067226		0.00904717
		0.00607805		0.00613568				0.00509838		0.00418382		0.0279201		0.0133413		0.0122623				0.0063191		0.00620835
		0.00677157		0.0066884				0.00479526		0.00526979		0.0306474		0.0165448		0.0123091				0.0062443		0.00832423
		0.00649513		0.00578702				0.00578655		0.00578146		0.0277445		0.0145031		0.0126131				0.0064314		0.00796864
		0.00671733		0.00542374				0.0060857		0.00366935				0.0157501		0.0120023				0.00643174		0.00907115
		0.00598728		0.00717982				0.00631451		0.00633959				0.0150353		0.0102014				0.00739932		0.0087425
		0.00751794		0.00707696				0.00678104		0.00548395				0.0123497		0.0161422				0.00640107		0.00842872
		0.00634245		0.00657194				0.00658867		0.00642381				0.012176		0.0154685				0.00895795		0.00871394
		0.00525483		0.00725639				0.00599217		0.00589605				0.0127951		0.0114503				0.00763498		0.00692397
		0.00523364		0.00621679				0.00568298		0.00523145				0.012384		0.0121333				0.00750032		0.00703186
		0.00772022		0.00680353				0.00635655		0.00628586				0.0127933		0.0130302				0.00607574		0.0059923
		0.00614325		0.00641819				0.00594386		0.00398476				0.010995		0.0148655				0.00877222		0.00678746
		0.00646517		0.00538942				0.00679964		0.00409383				0.00973089		0.0127748				0.00519454		0.00823846
		0.00706017		0.00753321				0.00708895		0.00532937				0.0117515		0.0137178				0.0052826		0.00590427
		0.00597443		0.00678035				0.00729569		0.00568577				0.0157201		0.024509				0.00520039		0.00577886
		0.0055198		0.00589538				0.00718933		0.00410125				0.0137488		0.0126546				0.00587998		0.00639114
		0.00471059		0.00623528				0.00879523		0.00441274				0.0124247		0.0117295				0.00614781		0.00712424
		0.00568614		0.00673581				0.00828052		0.00478786				0.0120882		0.024943				0.0057821		0.00810869
		0.00740346		0.0101694				0.00802202		0.00469749				0.0122984		0.0135674				0.00643759		0.0076932
		0.00642964		0.00801875				0.00785132		0.00566733				0.0128791		0.0128878				0.00661151		0.00710703
		0.00520341		0.00682187				0.00561677		0.00609575				0.0134238		0.0182961				0.00516029		0.00656582
		0.00686928		0.00608811				0.00563146		0.00476865				0.0113405		0.0182788				0.00528962		0.00842066
		0.00728904		0.00655675				0.00515327		0.0047892				0.0122726		0.0226852				0.00559188		0.00575705
		0.00728018		0.00604351				0.00523212		0.00533349				0.00859941		0.016468				0.00596697		0.00698405
		0.00480547		0.00656766				0.00534358		0.00567389				0.0142804		0.0141384				0.00526608		0.00862447
		0.00537828		0.00767486				0.0050127		0.00501982				0.0128607		0.0142921				0.00492041		0.00590985
		0.00378174		0.00760621				0.00529925		0.00446177				0.0122796		0.0166982				0.00459933		0.00755173
		0.00431192		0.00706303				0.00562674		0.00490553				0.0135422		0.0159343				0.00479103		0.00706818
		0.00553621		0.00578988				0.00641343		0.00475647				0.0127831		0.0153332				0.00482996		0.00637835
		0.00600537		0.00807531				0.00566516		0.00446422				0.0138488		0.0170618				0.00516197		0.0066931
		0.0064182		0.00747926				0.00465045		0.0051661				0.0151913		0.0137693				0.00547625		0.00705081
		0.00633362		0.00625371				0.00475367		0.0058271				0.0141677		0.0157254				0.00515309		0.00609744
		0.00585818		0.00589366				0.0057648		0.00578268				0.0106019		0.0168804				0.00599718		0.0075162
		0.00608739		0.00514187				0.00526663		0.00650008				0.0119749		0.0170445				0.00619972		0.00725729
		0.00559854		0.00549853				0.00667087		0.00648382				0.0139588		0.0156027				0.00640239		0.00578955
		0.00536393		0.00524333				0.0064676		0.00500483				0.0127148		0.0151583				0.00687568		0.00629112
		0.00556627		0.00739588				0.00518221		0.00507629				0.0140522		0.0157852				0.00585745		0.0063276
		0.0053355		0.00545156				0.00497469		0.00516145				0.0127927		0.0153738				0.00606412		0.0048817
		0.00535896		0.00725572				0.00502434		0.0066006				0.0131794		0.0162844				0.00834401		0.00513638
		0.00574389		0.00613267				0.004879		0.00544039				0.0128472		0.0163078				0.00796384		0.00660466
		0.00537426		0.00611149				0.00493371		0.00546935				0.0150638		0.0155978				0.00582857		0.00615942
		0.00517501		0.00703523				0.00520315		0.00442416				0.0167373		0.017332				0.00603928		0.00634462
		0.00556977		0.00539683						0.00452215				0.0127634		0.0178891				0.00520108		0.00476504
		0.00548876		0.0070238						0.00632311				0.0133479		0.0142777				0.00494502		0.0053985
		0.00542133		0.00492483						0.00582297				0.0116847		0.0153133				0.0058852		0.00533365
		0.00565783		0.00508901						0.00525018				0.0120306		0.0107365				0.00583877		0.00468109
		0.00638219		0.00817586						0.0045935				0.0123656		0.0105159				0.00613843		0.00657061
		0.00683382		0.00832983						0.00460788				0.012817		0.0152513				0.00586398		0.00635894
		0.00693686		0.0074449						0.00492701				0.0123084		0.0142068				0.00604616		0.00753833
		0.00437985		0.007579						0.00472694				0.0144288		0.0167225				0.00589592		0.00798625
		0.00489216		0.00571502						0.00576361				0.012923		0.0168412				0.00603209		0.00805987
		0.00636906		0.00749783						0.00611528				0.0142407		0.0137389				0.00649372		0.00664805
		0.00687045		0.00537636						0.00565772				0.0147123		0.0147458				0.00631269		0.00722724
		0.00586298		0.0045503						0.00557275				0.0163424		0.0162018				0.00595058		0.00630197
		0.00548237		0.00654849						0.00422946				0.0185327		0.0153038				0.00654239		0.00622841
		0.00812162		0.00743291						0.00588305				0.0131264		0.0169089				0.0065483		0.00838309
		0.00761358		0.00743942						0.00582897				0.0126773		0.0169163				0.00630731		0.00684488
		0.00534733		0.00738475						0.00515146				0.011321		0.0168908				0.00615198		0.00680322
		0.00549538		0.0051162						0.00516343				0.0120262		0.0168742				0.00503511		0.00812549
		0.00645663		0.008784						0.00532044				0.0153195		0.0149091				0.00514205		0.0065059
		0.00631094		0.00752478						0.00525914				0.0143418		0.0186422				0.0064056		0.00624024
		0.00715258		0.0084811						0.00530915				0.0127448		0.0103055				0.00600297		0.00778576
		0.00647424		0.00587592						0.00523387				0.0125641		0.0140714				0.00570819		0.00753116
		0.00609952		0.00716449						0.00612229				0.0158985		0.0136637				0.00468797		0.00879728
		0.00576173		0.00745473						0.00638304				0.0170262		0.015852				0.00457691		0.00480229
		0.00611853		0.00756119						0.00484758				0.013452		0.01185				0.00766004		0.00727537
		0.00598774		0.00580923						0.00477328				0.0129953		0.0108172				0.00773439		0.00857459
		0.00634813		0.00708272						0.00576923				0.0125434		0.018402				0.00715102		0.0049737
		0.00633991		0.00694575						0.00591685				0.0122174		0.0153167				0.00656362		0.00794268
		0.00647689		0.00424854						0.00640044				0.0112212		0.0145652				0.00574284		0.00795198
		0.005477		0.00635397						0.0063714				0.0121673		0.0219083				0.00603315		0.00948533
		0.00573995		0.00626134						0.00455351				0.0108922		0.0153				0.00557241		0.00978531
		0.00529688		0.00534502						0.00499766				0.0113675		0.0168755				0.00599281		0.00606447
		0.00594153		0.00556678						0.00541153				0.0117339		0.0159153				0.00546165		0.00838147
		0.00621382		0.0055374						0.00454646				0.0111679		0.016719				0.00681589		0.00967871
		0.00616768		0.00564078						0.0039586				0.0124762		0.0176405				0.006186		0.00889163
		0.00645767		0.00648015						0.0056198				0.0121052		0.0179596				0.00577477		0.0083488
		0.0060361		0.00543924						0.00401266				0.00846736		0.016323				0.00545088		0.0079942
		0.00533016		0.0077251						0.00468052				0.0116636		0.0158803				0.00621222		0.00612982
		0.00531154		0.00546753						0.00513787				0.0163431		0.0218355				0.0069287		0.00726195
		0.00604971		0.00831664						0.00545008				0.0165707		0.0231752				0.00724634		0.0105035
		0.00743067		0.00727798						0.00383159				0.0145845		0.0131163				0.00604347		0.0107016
		0.00729437		0.00698546						0.00396823				0.0153568		0.0143651				0.00471832		0.00911829
		0.00647952		0.0061933						0.00465487				0.00969805		0.014593				0.00477241		0.00675258
		0.00667031		0.00711079						0.00487804				0.00919999		0.0200384				0.00616487		0.00671339
		0.00684376		0.0057591						0.00528467				0.010434		0.0193653				0.00597565		0.00722266
		0.00648753		0.00636561						0.00631034				0.00907207		0.0154559				0.00587325		0.00674628
		0.00558223		0.00656182						0.00433243				0.0114297		0.014357				0.00643153		0.007445
		0.00671008		0.0060448						0.0048132				0.00807569		0.0135914				0.00622002		0.00764636
		0.00588524		0.00677936						0.00429567				0.00990584		0.0149465				0.00571778		0.00665085
		0.00812793		0.00705614						0.00554806				0.0119211		0.0192151				0.00565887		0.00763032
		0.00786516		0.00771354						0.00499693				0.00977569		0.0186832				0.00545043		0.00735016
		0.00501869		0.00774076						0.00541002				0.0106045		0.0167899				0.00478941		0.00524683
		0.0051275		0.00823949						0.00406676				0.0122203		0.0157383				0.00659041		0.00850766
		0.00819021		0.00649257						0.00467731				0.0132182		0.0149417				0.00610332		0.00902823
		0.00795481		0.00668875						0.0039194				0.0101087		0.014794				0.0054863		0.00810863
		0.00551402		0.00627553						0.00518122				0.0121273		0.0153158				0.00583624		0.005678
		0.00566878		0.00644006						0.00518874				0.0115325		0.015129				0.00596142		0.00559675
		0.0061585		0.006718						0.00430717				0.0117239		0.0215554				0.0054839		0.00691566
		0.00646764		0.00676457						0.0053767				0.0104457		0.0202029				0.00564303		0.00541222
		0.005444		0.0067407						0.0043238				0.00991091		0.0211145				0.00556268		0.00682422
		0.00612733		0.00615605						0.00476464				0.0103815		0.0203431				0.00569256		0.00614645
		0.00721131		0.00586288						0.00498589				0.0142834		0.019029				0.00587278		0.00640907
		0.00715617		0.00569737						0.00635301				0.0155778		0.0174674				0.00591788		0.00744101
		0.00600616		0.00564479						0.00509506				0.0125053		0.0181128				0.00603227		0.00708945
		0.00639472		0.00636176						0.00521679				0.0133869		0.0188211				0.0059783		0.00821226
		0.00837942		0.00554305						0.00419401				0.0151909		0.0138296				0.00573368		0.00915244
		0.0081525		0.00549685						0.00470047				0.0142129		0.0184866				0.00605106		0.00751099
		0.00802713		0.00458049						0.00510874				0.0107161		0.0189455				0.00748801		0.00532106
		0.00748186		0.00515232						0.0052359				0.0147433		0.0171357				0.0078211		0.00492274
		0.00657506		0.00586209						0.00374535				0.0123541		0.0217061				0.00436451		0.00521931
		0.0068061		0.00591496						0.00543331				0.011044		0.0204669				0.00578965		0.00682643
		0.00572334		0.00604818						0.00530899				0.0127555		0.013361				0.00589854		0.00716968
		0.0052297		0.00676648						0.00507079				0.0114708		0.0136932				0.00543112		0.00884288
		0.00544865		0.00624637						0.00494773				0.0120897		0.0170151				0.00545437		0.00912364
		0.0055123		0.00590697						0.00474189				0.0126502		0.0186078				0.00485518		0.00816743
		0.0055797		0.00567757						0.00450485				0.0112384		0.017874				0.0055384		0.0086247
		0.00510831		0.00575232						0.00523036				0.012284		0.0162567				0.00661333		0.00719793
		0.00522211		0.00497063						0.0046271				0.0112968		0.0205292				0.00526605		0.007205
		0.00477762		0.00504305						0.00488843				0.016432		0.0187378				0.00694148		0.00821327
		0.0050019		0.00529197						0.00464208				0.0161296		0.0133826				0.0061276		0.00796783
		0.00552802		0.005401						0.00323379				0.0150963		0.0147608				0.00562056		0.00820528
		0.00564837		0.0062038						0.00475163				0.0114015		0.0150806				0.00676034		0.00857866
		0.00622349		0.00643551						0.00483801				0.0144363		0.0145131				0.00622486		0.00620077
		0.00651326		0.00683975						0.00555139				0.0145008		0.0210392				0.00721655		0.00571304
		0.0063129		0.00694586						0.00483624				0.011485		0.0194896				0.00529905		0.00752961
		0.00647854		0.00620341						0.00485152				0.0159499		0.0148706				0.00581286		0.00778734
		0.0055807		0.00656443						0.00698382				0.0120363		0.0167181				0.00538666		0.00714756
		0.0051927		0.00938325						0.00531648				0.012372		0.0157382				0.00609441		0.00895486
		0.00569459		0.00581183						0.00511854				0.0176657		0.016871				0.00707166		0.00776301
		0.00614143		0.00604635						0.00479892				0.0154002		0.0138005				0.00651271		0.00825116
		0.00613811		0.00574244						0.0050322				0.0158276		0.0133762				0.00585424		0.00796866
		0.00695833		0.00613504						0.00492729				0.016894		0.016408				0.00559674		0.00642612
		0.00681348		0.00708925						0.00512431				0.0106389		0.0176198				0.0084906		0.00629284
		0.00561742		0.00750737						0.00517491				0.00940197		0.016264				0.00627055		0.00738355
		0.00571262		0.00672738						0.00495312				0.0101841		0.0179328				0.00630781		0.00739778
		0.00579794		0.00650814						0.00749964				0.00970571		0.0128493				0.00707501		0.00577449
		0.00610037		0.0061616						0.00792688				0.00830552		0.0120767				0.0059453		0.00607399
		0.00505023		0.0054632						0.00503916				0.0105699		0.0236512				0.00703666		0.00697276
		0.00635093		0.00535662						0.00429475				0.010315		0.0243082				0.0071081		0.00716963
		0.00580955		0.00819759						0.00532208				0.0103765		0.0189805				0.0083929		0.00591474
		0.00629037		0.00738473						0.00524334				0.0134044		0.0191787				0.00673095		0.00917527
		0.00608149		0.00650543						0.00677804				0.0151859		0.0178275				0.00600849		0.00961362
		0.00613007		0.00738592						0.00750291				0.0106531		0.0180573				0.00731699		0.00626892
		0.00583973		0.00610202						0.00500794				0.0115443		0.0196111				0.00736866		0.00673462
		0.00532901		0.00626701						0.00419743				0.0105141		0.0190209				0.00645781		0.00734312
		0.00565442		0.00706765						0.00666894				0.0125521		0.0139765				0.00626741		0.0065776
		0.00550701		0.00728606						0.00535238				0.0140455		0.0130433				0.00574022		0.00645063
		0.00617893		0.00614296						0.00820949				0.0129516		0.0134628				0.00573681		0.00565778
		0.00559218		0.00728351						0.00482535				0.0139827		0.0162358				0.0053882		0.00605187
		0.00571097		0.00623854						0.00503058				0.0141066		0.0170678				0.00544077		0.00498099
		0.00651355		0.00814669						0.00653003				0.01218		0.0205336				0.0063364		0.00607009
		0.00771058		0.00534773						0.00570033				0.0126424		0.0178391				0.00667277		0.00543107
		0.0067592		0.00863659						0.00559936				0.0115391		0.0109189				0.00595622		0.00613216
		0.00587334		0.00665396						0.00563294				0.0131885		0.00995965				0.00656855		0.00706795
		0.00533877		0.00584329						0.00510894				0.0141021		0.0117648				0.00597275		0.00773704
		0.00663827		0.00561038						0.00611391				0.0139546		0.0177472				0.00600543		0.0080216
		0.00508485		0.00672262						0.00617296				0.0129605		0.0182885				0.00457817		0.00684547
		0.00618093		0.00666395						0.00570124				0.0131177		0.0113017				0.0056554		0.00696718
		0.00688672		0.00711895						0.00580788				0.0105758		0.0118483				0.00600481		0.00797261
		0.00626637		0.00709501						0.00617446				0.0131278		0.0180695				0.00570045		0.0100931
		0.00543146		0.00578158						0.00466658				0.0116136		0.00981339				0.00519289		0.00593068
		0.00609682		0.00731051						0.0047863				0.0145928		0.0101708				0.00538843		0.00658126
		0.00652021		0.00702197						0.00642785				0.0136098		0.0145675				0.00481487		0.00695081
		0.00673753		0.00680586						0.00611373				0.0148348		0.0184986				0.00554745		0.00545391
		0.00638829		0.00650618						0.00592783				0.0156822		0.0158944				0.00541006		0.0053155
		0.0056042		0.00606554						0.00671884				0.0147313		0.0128545				0.00482767		0.00733937
		0.00485799		0.00625597						0.00570195				0.00908008		0.0187745				0.00545344		0.0082302
		0.00586815		0.00914092						0.00454289				0.00989908		0.0190183				0.0055114		0.00810264
		0.00613138		0.00874202						0.00454959				0.00979535		0.0169371				0.00553547		0.0075157
		0.00615358		0.00498027						0.00550094				0.00884077		0.0167871				0.00482852		0.00675606
		0.00659285		0.00501563						0.00587965				0.010737		0.017922				0.00658804		0.00906707
		0.00529208		0.00552553						0.00497182				0.0114065		0.0125257				0.00497756		0.00908147
		0.00526941		0.00558321						0.00561912				0.01219		0.0160814				0.00653189		0.0106386
		0.00600325		0.00709246						0.00507585				0.0121944		0.0156913				0.00584235		0.0115719
		0.00572748		0.00617751						0.00502526				0.0120816		0.0185178				0.00514037		0.00803763
		0.0057405		0.00655433						0.00514025				0.0128339		0.0203385				0.00584851		0.00842258
		0.0063238		0.00633187						0.00612031				0.010582		0.0206229				0.00561576		0.00482116
		0.00493103		0.00604295						0.00608183				0.0154899		0.0199105				0.0064634		0.00750307
		0.00617324		0.00611591						0.0063178				0.0146711		0.0199734				0.00497355		0.00731897
		0.00497266		0.00723771						0.00532141				0.0111557		0.0128232				0.00533916		0.00754057
		0.00631139		0.00760799						0.00548875				0.0112791		0.019126				0.0054391		0.00812355
		0.00579475		0.00687443						0.00549442				0.0120315		0.0155804				0.00441068		0.00748956
		0.00716238		0.00701839						0.00594718				0.0135884		0.0168468				0.00494808		0.00812064
		0.00635636		0.00734962						0.00454488				0.0143325		0.0206325				0.00548184		0.00818577
		0.00671709		0.00805439						0.00542182				0.0169583		0.0198614				0.00835968		0.00859964
		0.00602348		0.00683754						0.00594893				0.0163326		0.0142974				0.00514265		0.0069567
		0.00774005		0.00696235						0.00616118				0.013438		0.0193565				0.00574047		0.00753162
		0.00683884		0.00475843						0.0044609				0.0128719		0.0165065				0.0042506		0.00692818
		0.00600146		0.00479943						0.00551885				0.0139681		0.0199569				0.0042225		0.00696017
		0.00817352		0.00516116						0.00624371				0.0136126		0.0161367				0.00558933		0.00999878
		0.00618523		0.00536932						0.00516823				0.0132245		0.0168001				0.00530389		0.00848886
		0.00796066		0.00474204						0.00542257				0.0141046		0.0129075				0.00483877		0.00934193
		0.00637192		0.00473679						0.00614193				0.0125429		0.0183837				0.00513675		0.00642048
		0.00681284		0.00625042						0.00559905				0.0127857		0.0143453				0.00402432		0.00608289
		0.00654907		0.00479486						0.00566427				0.0139779		0.0135273				0.00380328		0.00735521
		0.00594124		0.00454636						0.00582602				0.0127461		0.0184542				0.00477859		0.00740785
		0.00724267		0.00529446						0.00556216				0.0102004		0.0124491				0.00533336		0.00718263
		0.00693092		0.00673251						0.00690967				0.0110222		0.0139838				0.00569183		0.0067434
		0.00677697		0.00666636						0.00646326				0.0105643		0.0133563				0.0052153		0.00611523
		0.00588908		0.00694136						0.00576778				0.00994248		0.016969				0.00608024		0.00564137
		0.00633561		0.00550373						0.00601411				0.0126254		0.0163995				0.00585009		0.00592129
		0.00642842		0.00625938						0.00712832				0.0120886		0.0155858				0.00622668		0.00656444
		0.00688614		0.00595809						0.0054459				0.0109647		0.0150556				0.0058905		0.00629068
		0.00643564		0.00617025						0.00658072				0.0118997		0.0152142				0.00511699		0.0091251
		0.00490228		0.00578502						0.00602298				0.0154009		0.0169781				0.00708152		0.00920544
		0.00682269		0.00629946						0.00641461				0.0154956		0.0123367				0.00537425		0.00838138
		0.00674011		0.00598673						0.00632975				0.0165094		0.0138821				0.00565442		0.00709806
		0.00491856		0.00656564						0.00626303				0.016047		0.0124787				0.00635768		0.00695995
		0.00724516		0.00706328						0.00476967				0.0163847		0.0176469				0.00610768		0.0090467
		0.00520904		0.00741953						0.00630043				0.0148697		0.0140037				0.0057706		0.0112537
		0.00509038		0.00680665						0.00580696				0.0118765		0.0129164				0.00598822		0.0117681
		0.00708257		0.00719753						0.005121				0.0124901		0.0123317				0.0069187		0.00866098
		0.00451682		0.00734011						0.00631755				0.0142097		0.0154741				0.00710358		0.00798924
		0.00540036		0.00644657						0.00602395				0.0134476		0.0131485				0.00647333		0.00923139
		0.00696358		0.00760268						0.00660032				0.0118035		0.0123871				0.00644701		0.00827207
		0.00516171		0.00765754						0.00516588				0.0124139		0.0143182				0.00674858		0.00615799
		0.00546316		0.00705479						0.00773252				0.0137725		0.0112829				0.00667731		0.00618449
		0.00718515		0.00767283						0.00596484				0.0157961		0.0187444				0.00511572		0.00739869
		0.00456695		0.00680659						0.00544504				0.0118062		0.0166914				0.00575276		0.00797396
		0.00523192		0.00647379						0.00574589				0.0112974		0.0148124				0.00686221		0.00662049
		0.00514548		0.006221						0.00606559				0.0142941		0.015061				0.0074076		0.00651102
		0.00598159		0.00809034						0.00528889				0.013869		0.0112803				0.00579345		0.00711886
		0.00559907		0.0055729						0.00622521				0.0128447		0.0161594				0.00605075		0.0057361
		0.00595139		0.00600494						0.00658416				0.0119499		0.0124384				0.00438466		0.00573967
		0.00543096		0.00893694						0.00561719				0.0123696		0.0126722				0.00452901		0.00600024
		0.00614094		0.00857761						0.00539164				0.01264		0.015069				0.00612561		0.00647776
		0.00702479		0.00654045						0.00525507				0.0148556		0.0156148				0.00636712		0.00662557
		0.00602706		0.00757938						0.00634732				0.016429		0.0131007				0.00492813		0.00656416
		0.00585965		0.00653747						0.00522659				0.0121981		0.0137923				0.00476341		0.00529218
		0.00527186		0.00589531						0.00533655				0.0111408		0.013816				0.00504971		0.00509322
		0.00628009		0.00633961						0.00584504				0.016876		0.0134749				0.00543785
		0.00532186		0.00806036						0.0075422				0.0156029		0.0156129				0.00499226
		0.00741172		0.00642216						0.00730281				0.0140441		0.0195735				0.00519216
		0.00659098		0.00682918						0.00632555				0.0137169		0.0118626				0.00522558
		0.00496804		0.00676782						0.00490656				0.0148085		0.0247997				0.00578059
		0.00689874		0.00695122						0.0048329				0.0153692		0.0114537				0.00577298
		0.00580085		0.006153						0.00542985				0.0125428		0.0113685				0.00614433
		0.00619821		0.00568147						0.00533722				0.0129434		0.023721				0.00593693
		0.0058272		0.00896061						0.0049774				0.0165094		0.0124742				0.00617006
		0.00461265		0.00680882						0.00553279				0.0160514		0.0155443				0.00584334
		0.00553555		0.0068607						0.00468274				0.014077		0.0167031				0.00518966
		0.00620302		0.00794187						0.00513759				0.0139866		0.0164462				0.00514618
		0.00566305		0.00704342						0.00494533				0.0156787		0.0154621				0.00852632
		0.00551786		0.00837856						0.00532843				0.01671		0.0211862				0.00908913
		0.00524351		0.00780759						0.00523533				0.0144804		0.0136186				0.00527042
		0.00732075		0.00653657						0.00582292				0.0135617		0.0197565				0.0048306
		0.00728798		0.00940032						0.00607261				0.011962		0.0179672				0.00626253
		0.0053594		0.00652658						0.00461806				0.0132441		0.021144				0.00697476
		0.00659405		0.00577722						0.00475571				0.0128		0.0161372				0.00643836
		0.00587869		0.00688035						0.00461292				0.0123054		0.0150048				0.00664151
		0.00508257		0.0073012						0.00457832				0.0146267		0.0161422				0.00546522
		0.00689969		0.00789949						0.00621054				0.0134594		0.0180609				0.00507479
		0.0064882		0.00870825						0.00634714				0.0127905		0.0155305				0.00578987
		0.00579698		0.00785331						0.00475647				0.0113531		0.0160143				0.00605478
		0.00574855		0.00598181						0.00641328				0.012527		0.0189418				0.00527436
		0.00582772		0.00737158						0.00556715				0.0117132		0.0161548				0.00504596
		0.00660003		0.00623599						0.00456466				0.01117		0.0159109				0.00565276
		0.00528295		0.00637556						0.00475415				0.0110274		0.0156573				0.00542255
		0.00487713		0.00640245						0.00558581				0.00973747		0.0161341				0.00648621
		0.00621661		0.0076133						0.00582571				0.0095094		0.0190561				0.00584428
		0.00657424		0.00760298						0.00607271				0.0135316		0.0128833				0.00591942
		0.00526565		0.00913809						0.00638328				0.0142595		0.0189903				0.00647448
		0.00529131		0.00887337						0.00559854				0.0127429		0.0171198				0.007743
		0.0058886		0.00644415						0.00602929				0.0122121		0.0172787				0.00827397
		0.00695231		0.00756035						0.00785889				0.0161889		0.0148271				0.00802886
		0.00547559		0.00753857						0.00730355				0.0176332		0.018219				0.0063556
		0.00604235		0.00709767						0.00529769				0.0134212		0.0139018				0.0060477
		0.00628148		0.00705133						0.00489319				0.0125797		0.0143484				0.0054166
		0.00640791		0.00798154						0.00524855				0.0114549		0.0208118				0.00569758
		0.00649473		0.00850335						0.00652535				0.0128294		0.0170254				0.00433498
		0.00617922		0.00652084						0.00576278				0.0103934		0.0190557				0.00495507
		0.00556753		0.00725674						0.00559165				0.0116304		0.0158675				0.00460673
		0.0054287		0.00724732						0.0061617				0.0103043		0.0178046				0.00493931
		0.00516523		0.00478751						0.0058001				0.0122331		0.0206951				0.00499887
		0.00526498		0.00664999						0.00690281				0.0110832		0.0158828				0.00537385
		0.00698808		0.0089202						0.00621326				0.0118768		0.0178839				0.00515966
		0.00681219		0.0074054						0.00502515				0.0126706		0.018394				0.00633887
		0.00662639		0.00639706						0.004997				0.0140767		0.0183737				0.005678
		0.00756545		0.00687821						0.00453622				0.0109917		0.0149119				0.00504684
		0.0066757		0.00631272						0.00471316				0.0103771		0.02016				0.0053686
		0.00647385		0.00709819						0.00574456				0.0141787		0.0197946				0.00546479
		0.00455609		0.0085225						0.00524067				0.0104627		0.0145821				0.00500976
		0.00440375		0.00796669						0.00621255				0.0138649		0.0191823				0.00605027
		0.00631648		0.00660352						0.00581629				0.0137916		0.0234667				0.00494532
		0.00544426		0.00929146						0.00562082				0.0123491		0.0166228				0.00544903
		0.00575827		0.00661536						0.00566692				0.0109864		0.0160348				0.00515574
		0.00578806		0.00652185						0.00609151				0.0149261		0.0193145				0.00483408
		0.00637092		0.00758073						0.00475899				0.0116135		0.0232831				0.00514228
		0.00762437		0.00671453						0.00504571				0.0120086		0.017577				0.00612307
		0.00590736		0.00624306						0.00633414				0.0109039		0.0198189				0.00472716
		0.00662813		0.00786703						0.00560657				0.0128007		0.0185003				0.00563336
		0.00599828		0.00734199						0.00577044				0.0132263		0.0171978				0.00540691
		0.00582216		0.00704081						0.00506693				0.0164443		0.0162385				0.00498718
		0.0047002		0.00647668						0.00665645				0.0126192		0.0184992				0.00519861
		0.00495005		0.00670843						0.00689135				0.0115484		0.0206513				0.0055324
		0.00665908		0.00716624						0.00636549				0.0139452		0.0131458				0.00475947
		0.00669614		0.00910175						0.00590805				0.0102884		0.0167693				0.00543548
		0.00644829		0.0065066						0.00551944				0.0109911		0.0197368				0.0055617
		0.00503986		0.00628827						0.00556066				0.0164389		0.0165707				0.00588059
		0.00531107		0.00632519						0.00543614				0.0161725		0.0164989				0.00586915
		0.0054672		0.00676011						0.00455488				0.015878		0.0183221				0.00565913
		0.00527031		0.00739332						0.00592574				0.0163561		0.0157002				0.00553538
		0.00568876		0.00630661						0.00638337				0.0130203		0.0157361				0.00576421
		0.00595363		0.00593284						0.00564465				0.01178		0.0203051				0.00600629
		0.00541576		0.00847064						0.00564765				0.0144199		0.0152673				0.00506865
		0.00592723		0.00643287						0.00519535				0.0177696		0.0145509				0.00617734
		0.00567354		0.00570565						0.00532228				0.0134505		0.0152573				0.00494352
		0.00597412		0.00884618						0.00622566				0.0141817		0.0183256				0.00601575
				0.00574243						0.00633051				0.0166103		0.0174141				0.00479986
				0.00553904						0.00502938				0.0193265		0.0171788				0.00526254
				0.00573988						0.0065831				0.0147064		0.0187798				0.00545649
				0.00654434						0.00652187				0.0152884		0.0210883				0.00560349
				0.00552326						0.0056183				0.0170897		0.0150824				0.00600837
				0.00660018						0.00645046				0.0148861		0.0153395				0.00601743
				0.00585091						0.00538388				0.0153244		0.0151624				0.00613589
				0.00855873						0.00495746				0.0154499		0.0169904				0.00639307
				0.00671891						0.00535441				0.015625		0.0149919				0.00583601
				0.00715098						0.0067426				0.0114459		0.0227079				0.00739727
				0.00695924						0.00629924				0.0151014		0.01995				0.00522142
				0.00704164						0.00471626				0.0165008		0.0148689				0.00605764
				0.00712299						0.00466543				0.0180963		0.0209271				0.00799895
				0.0057431						0.0056104				0.0164173		0.020426				0.00653767
				0.00865019						0.00575115				0.015696		0.0169886				0.00599663
				0.00661635						0.0054722				0.0153437		0.0151346				0.00733903
				0.00676959						0.00581256				0.0154909		0.0162319				0.00481483
				0.00657753						0.00577513				0.0152617		0.0141788				0.00641209
				0.00572927						0.00451915				0.0173035		0.0200241				0.00676905
				0.00565058						0.00468819				0.0167463		0.0149521				0.00783736
				0.00725388						0.00570262				0.0168682		0.0233677				0.00470551
				0.00663898						0.00490385				0.0181946		0.0221106				0.00612829
				0.00618051						0.00462358				0.0166872		0.0180434				0.00763977
				0.0066211						0.00456297				0.0120559		0.0145933				0.00589965
				0.00760743						0.00480629				0.012482		0.021804				0.00664316
				0.00742812						0.00457426				0.0172286		0.0171847				0.00624434
				0.00625281						0.00500069				0.0152069		0.0199491				0.0058432
				0.00541292						0.00467681				0.0127259		0.0231851				0.00512489
				0.00713731						0.00443848				0.0195815		0.0209729				0.00501531
				0.00542313						0.00417118				0.011867		0.0161997				0.00599246
				0.00596632						0.00439106				0.012873		0.0210654				0.00516539
				0.00604754						0.00455091				0.0138956		0.0209385				0.0061866
				0.00579247						0.00498755				0.0168268		0.0170598				0.00571066
				0.0054032						0.00479894				0.0176815		0.020607				0.0065832
				0.00691514						0.00430742				0.0150313		0.0193421				0.00567196
				0.00692411						0.00533068				0.017292		0.0216374				0.00564287
				0.00799676						0.00519528				0.0186642		0.0167826				0.00548874
				0.0090492						0.00471406				0.0193322		0.0147689				0.00653225
				0.00751296						0.00471324				0.0193161		0.0157875				0.00593891
				0.0107559						0.00438164				0.0177615		0.0116264				0.00877476
				0.00758204						0.00495117				0.0199368		0.0124256				0.00544422
				0.00720481						0.00320531				0.0164204		0.0182795				0.00625457
				0.00797893						0.0050393				0.0186922		0.0184046				0.00822526
				0.00895091						0.00496927				0.0159356		0.0102974				0.00866643
				0.00875729						0.00511251				0.0201117		0.0113521				0.00647227
				0.00797294						0.00593669				0.0192879		0.0125405				0.00874121
				0.00713368						0.00541609				0.0185697		0.0128133				0.00854446
				0.00704163						0.00549573				0.0170722		0.0179732				0.0083155
				0.00896416						0.00543931				0.0151699		0.0184956				0.00566124
				0.00816734						0.00558159				0.018067		0.0190433				0.00681199
				0.00655404						0.00586986				0.0172098		0.01902				0.00697502
				0.00761747						0.00511984				0.0137043		0.00961097				0.00871434
				0.0058431						0.0054392				0.0177579		0.0123904				0.00827858
				0.00516202						0.00531842				0.0192694		0.0219242				0.00606303
				0.00711263						0.00485749				0.0162156		0.0227306				0.00625196
				0.0075006						0.00506963				0.0164003		0.0181683				0.008554
				0.0068826						0.00558241				0.0172959		0.0184304				0.00608161
				0.00585445						0.00603668				0.0119367		0.0125947				0.00752158
				0.0082484						0.00550414				0.0207921		0.0110872				0.00732502
				0.00836919						0.00565435				0.0158172		0.013232				0.00681778
				0.00832666						0.00488361				0.0161492		0.0178344				0.00708823
				0.00814946						0.00506396				0.0179546		0.0191062				0.00729264
				0.00679354						0.00561357				0.0140353		0.0205087				0.00818571
				0.00645828						0.00524645				0.0196825		0.0212254				0.00725133
				0.00576649						0.00589065				0.0114063		0.0177097				0.00797323
				0.00566462						0.00570738				0.0122963		0.0154015				0.00848537
				0.00558565						0.00564982				0.0146406		0.0163298				0.00634134
				0.00582863						0.0055897				0.0124174		0.0170475				0.00658444
				0.00638071						0.00566269				0.0113209		0.0195595				0.00505634
				0.00715854						0.00644278				0.01269		0.0171051				0.00490721
				0.00729882						0.00678212				0.0114306		0.0152522				0.0055879
				0.00585067						0.00717157				0.0112315		0.0130993				0.00549783
				0.006301						0.00681288				0.0137839		0.0176282				0.00558147
				0.00782668						0.00734843				0.0150888		0.0176223				0.00574517
				0.00878265						0.00614003				0.01441		0.0149176				0.00510862
				0.00840366						0.00724334				0.0138754		0.0126605				0.0050165
				0.00722007						0.0054814				0.0142147		0.0128473				0.00610774
				0.00720156						0.0061716				0.0117508		0.0219359				0.00611729
				0.0065157						0.00534429				0.0102177		0.0129561				0.00539967
				0.0091401						0.00437671				0.0110134		0.0146117				0.00611772
				0.00854572						0.00665815				0.0102563		0.0170691				0.00582936
				0.00981869						0.00431609				0.0105515		0.0150378				0.0057459
				0.00999333						0.00531934				0.0122418		0.0161192				0.00555662
				0.00747048						0.00723911				0.0114415		0.0199237				0.00554094
				0.00771576						0.00448426				0.0115381		0.0181587				0.00527255
				0.00871538						0.00736208				0.0126404		0.0149924				0.00566441
				0.00854891						0.0057511				0.0124906		0.0151922				0.00530133
				0.00829665						0.0057473				0.012825		0.0137384				0.00749207
				0.00820278						0.00601013				0.0131246		0.0153414				0.00796747
				0.00553501						0.00458855				0.014357		0.0156936				0.00611336
				0.00536382						0.00459106				0.0150244		0.0163095				0.00560502
				0.00876307						0.00591851				0.0146648		0.0124833				0.00628175
				0.00855908						0.00522661				0.0161957		0.0140007				0.00659726
				0.0068809						0.00526301				0.014745		0.0212468				0.00540003
				0.00737585						0.00451665				0.0145578		0.0211745				0.00536266
				0.00717508						0.0046542				0.0140136		0.0183454				0.00559071
				0.00716251						0.00478778				0.0157375		0.0188883				0.00558866
				0.00747569						0.00637923				0.0149106		0.0125106				0.00578956
				0.00549166						0.0063498				0.0110323		0.0135782				0.00829645
				0.00732583						0.00475215				0.0108931		0.0208166				0.00530405
				0.00729422						0.00416262				0.0161837		0.0177341				0.00631595
				0.00726007						0.00418281				0.0158796		0.0176246				0.0102567
				0.00797783						0.0055105				0.0106293		0.0170347				0.00915392
				0.00745549						0.00562727				0.0113715		0.0181664				0.00610471
				0.00667975						0.00627365				0.0102966		0.0160308				0.00573752
				0.00706619						0.00550221				0.0102007		0.0113704				0.00609184
				0.007206						0.00513595				0.0130227		0.0192343				0.00746507
				0.00711371						0.00615571				0.0128051		0.018753				0.00724625
				0.00648723						0.00603049				0.0171971		0.0210185				0.0076022
				0.00640206						0.00465111				0.0149712		0.0202073				0.0066245
				0.00689362						0.00420731				0.014946		0.0201713				0.00662708
				0.00729582						0.00609164				0.0137607		0.0212826				0.00655451
				0.00820152						0.00667574				0.0101374		0.0123508				0.00710781
				0.00825699						0.00722288				0.0113972		0.0154215				0.00708894
				0.00593419						0.00653761				0.01503		0.0219329				0.00708096
				0.00571064						0.00598972				0.0152629		0.0198894				0.00643626
				0.00747912						0.0057716				0.0153445		0.0208706				0.00692356
				0.00767848						0.00653701				0.0139979		0.0167191				0.00698321
				0.00674385						0.0053504				0.0186327		0.0173882				0.00783865
				0.00669924						0.00645991				0.0171812		0.0178356				0.0076603
				0.00733513						0.00585503				0.0147145		0.0204078				0.00614602
				0.00775557						0.00592629				0.0126408		0.0205272				0.00657976
				0.0088014						0.00565922				0.0156231		0.012				0.00647835
				0.00834612						0.00582509				0.016449		0.011723				0.00670393
				0.00770345						0.006689				0.0176447		0.0176426				0.00449255
				0.00776635						0.00641641				0.0182368		0.0159926				0.00478553
				0.00834741						0.00598121				0.0142566		0.0175021				0.00591223
				0.00826667						0.00591333				0.0153958		0.01715				0.00567622
				0.00803831						0.00624154				0.0132415		0.0165413				0.00786207
				0.00599477						0.00550161				0.0147602		0.016226				0.00836504
				0.00724728						0.00578183				0.0133796		0.0141411				0.00492784
				0.0069271						0.00620551				0.0175511		0.0127701				0.00530209
				0.00544793						0.00624508				0.0162015		0.0170617				0.00857397
				0.00816587						0.00518906				0.0170052		0.0178227				0.00880355
				0.00618873						0.00482858				0.0182959		0.0165998				0.00680513
				0.00622895						0.00511565				0.0193903		0.0168211				0.00661277
				0.0101256						0.005115				0.017228		0.0177224				0.00535908
				0.0100496						0.00496968				0.0174231		0.0164108				0.00677376
				0.00676521						0.00467753				0.0176478		0.0143184				0.0048421
				0.00579599						0.00529856				0.0157693		0.015051				0.00494338
				0.00737595						0.00560081				0.0178415		0.0183646				0.00529471
				0.00696124						0.00483191				0.0157469		0.0166041				0.00619956
				0.00609808						0.00478902				0.0179783		0.0159048				0.00687571
				0.00584987						0.00561844				0.0171318		0.0145327				0.00625382
				0.00826306						0.00560139				0.0143178		0.0202196				0.00648818
				0.00830355										0.0135752		0.0166068				0.00555832
				0.00708188										0.0125419		0.0176408				0.00647136
				0.00587343										0.0165348		0.0192199				0.0054644
				0.00593995										0.0162077		0.0213122				0.00685989
				0.00589909										0.0120394		0.0128833				0.00629452
				0.00630541										0.0121802		0.0131243				0.00460764
				0.00785484										0.0122908		0.0218599				0.00577872
				0.00766297										0.0130969		0.0222722				0.00559281
				0.00668493										0.0133724		0.0186044				0.00648852
				0.00587677										0.0120789		0.0194367				0.00481353
				0.00999131										0.0126512		0.0183875				0.00695659
				0.0101544										0.0113567		0.0208557				0.00500551
				0.00683686										0.0138388		0.0142826				0.00635788
				0.00746522										0.0148553		0.0126241				0.00538004
				0.00712523										0.0129558		0.0258729				0.00714482
				0.00760093										0.012468		0.0188792				0.00617487
				0.00678966										0.0113615		0.0177699				0.00714072
				0.00795736										0.0114505		0.0178294				0.00517415
				0.00784469										0.0136478		0.0156724				0.00570938
				0.00534742										0.0138909		0.0181986				0.00696814
				0.00590878										0.0155973		0.02072				0.0055388
														0.0151617		0.0210057				0.00591521
														0.0141762		0.0216438				0.00643441
														0.0151529		0.0214147				0.00946447
														0.0140743		0.0233567				0.00612233
														0.0131337		0.022389				0.00566897
														0.0105729		0.022058				0.00653132
														0.0102484		0.0157739				0.00629191
														0.0112011		0.014351				0.00874416
														0.0116935		0.0190338				0.00608199
														0.0121372		0.0190488				0.00615557
														0.0112868		0.0182597				0.00634026
														0.0145297		0.0149612				0.00459918
														0.0162409		0.017489				0.00613916
														0.013972		0.0167648				0.00566371
														0.0131412		0.0206532				0.0058767
														0.0131461		0.016004				0.00680438
														0.0133137		0.0155222				0.00542953
														0.0113928		0.0161299				0.00670633
														0.0102651		0.0148433				0.00672671
														0.0100269		0.0162767				0.00871227
														0.0109274		0.0171382				0.0062753
														0.0160129		0.0163675				0.00591372
														0.0200347		0.0240357				0.0062644
														0.0114612		0.0221183				0.00653365
														0.0127902		0.0156573				0.0069539
														0.0160522		0.0171819				0.00632157
														0.0143047		0.0160946				0.00742481
														0.0188967		0.0154543				0.00623329
														0.0194041		0.0188898				0.00582582
														0.0152656		0.0170365				0.00689064
														0.0157006		0.0164323				0.00611976
														0.0138589		0.0167075				0.00601662
														0.0154698		0.0156386				0.00642797
														0.01135		0.0222497				0.00487082
														0.0114752		0.0192165				0.00663507
														0.0110249		0.0189001				0.00527525
														0.0110933		0.0160936				0.00634456
														0.0120272		0.0196239				0.00570134
														0.0122098		0.0185171				0.0048875
														0.0149017		0.0168865				0.00671328
														0.0132053		0.0182016				0.00679377
														0.0119311		0.0201393				0.00489384
														0.0133597		0.0197533				0.00550621
														0.0146067		0.016611				0.00546328
														0.0143324		0.0153115				0.00540469
														0.014423		0.0135741				0.00551654
														0.0121974		0.0135246				0.00972653
														0.0130385		0.0156739				0.00629723
														0.0128479		0.0151362				0.0091983
														0.0108803		0.0187157				0.00634025
														0.0152012		0.0169953				0.00658274
														0.016054		0.0179989				0.00548465
														0.0137205		0.0182121				0.00634813
														0.0146339		0.0127552				0.00600564
														0.0158636		0.0120733				0.0062652
														0.0166688		0.0239967				0.00476684
														0.0168822		0.0234955				0.00628782
														0.0134706		0.0215772				0.00669286
														0.0163346		0.0212664				0.00514122
														0.0154257		0.0200013				0.00472384
														0.0108715		0.0163991				0.00560394
														0.0154705		0.0170666				0.00499769
														0.0116415		0.0175383				0.00453213
														0.0162857		0.0197027				0.00629615
														0.0113511		0.0176904				0.00491693
														0.0145598		0.0126035				0.00552235
														0.0158072		0.0139588				0.00617908
														0.0162344		0.0198092				0.00582482
														0.0201488		0.0187228				0.00593757
														0.0141201		0.0218706				0.00767757
														0.0149788		0.0193656				0.00700648
														0.0125901		0.0173519				0.00765008
														0.0172138		0.0160894				0.00805551
														0.0153658		0.0161927				0.00611451
														0.0144301		0.0156313				0.00654189
														0.0170618		0.0225158				0.00572622
														0.0144245		0.0232761				0.00637224
														0.0127461		0.0245771				0.00480783
														0.0176231		0.0244629				0.00680099
														0.0125987		0.0226188				0.00815655
														0.0141472		0.0212035				0.00614448
														0.0141998		0.0182812				0.0055132
														0.0119488		0.0190079				0.00520445
														0.0179598		0.0142229				0.00497892
														0.0113992		0.0158885				0.00643259
														0.0163784		0.0178476				0.00529198
														0.0173494		0.017741				0.00756442
														0.0134301		0.0202482				0.00619907
														0.0112264		0.0170352				0.00686621
														0.0113181		0.0100847				0.00563642
														0.0139995		0.0102024				0.00590498
														0.0123136		0.0128047				0.00584036
														0.0144163		0.0128959				0.00560857
														0.0120249		0.0134529				0.00504998
														0.012543		0.0108785				0.00589858
														0.0138699		0.0110934				0.00537458
														0.0125547		0.015228				0.00573561
														0.0130011		0.0140085				0.00542701
														0.0111152		0.0121151				0.0046287
														0.0129133		0.0154568				0.0049811
														0.0119803		0.0137239				0.00555369
														0.01142		0.0122028				0.00645004
														0.0119579		0.0169171				0.00694608
														0.0134302		0.0106179				0.00645779
														0.0102004		0.010517				0.00552031
														0.0124636		0.0150594				0.00591935
														0.0109675		0.0132018				0.00589517
														0.0105577		0.0140049				0.00556388
														0.011701		0.0135405				0.00481545
														0.0136216		0.0117327				0.00479752
														0.015776		0.011615				0.00569595
														0.0152172		0.0158314				0.0078663
														0.0138013		0.0121372				0.00521968
														0.0154811		0.015489				0.00576035
														0.0165549		0.0172243				0.00654065
														0.0116362		0.0178054				0.00687135
														0.0139451		0.0163995				0.00669329
														0.0144488		0.0119324				0.00482574
														0.0128465		0.0128517				0.00495812
														0.0131828		0.0120211				0.00610764
														0.0154004		0.0130484				0.00759964
														0.0151631		0.0119011				0.00748683
														0.0173554		0.0119889				0.0074442
														0.0152025		0.0135515				0.00811034
														0.0125171		0.0133049				0.00683813
														0.014413		0.011883				0.00524938
														0.0129652		0.0117972				0.00494033
														0.0189306		0.0136007				0.00754171
														0.0178196		0.0141049				0.00758644
														0.0163477		0.0114954				0.00771221
														0.0153987		0.0120327				0.00585015
														0.014646		0.0115304				0.00567265
														0.0151973		0.0123612				0.00570014
														0.0211504		0.0122465				0.00668594
														0.0194246		0.0137819				0.00655009
														0.0134499		0.0162626				0.00528577
														0.0148513		0.0131659				0.00577338
														0.0153733		0.0130496				0.00576725
														0.0154783		0.0159303				0.00700551
														0.0136775		0.0163029				0.00649263
														0.0128081		0.0181312				0.00545365
														0.0131495		0.0142938				0.00520699
														0.0133732		0.0175891				0.00694435
														0.0164212		0.0161215				0.00664023
														0.013132		0.0174917				0.0058358
														0.0139848		0.0155734				0.00556622
														0.0130663		0.0165828				0.00721508
														0.0179119		0.0164894				0.00756488
														0.0180211		0.0128289				0.00517755
														0.0188386		0.0117305				0.00501849
														0.0176352		0.0156218				0.00640005
														0.0182838		0.0163758				0.00730671
														0.0163442		0.0156706				0.00752803
														0.0146469		0.0169935				0.00744891
														0.0149695		0.0168571				0.00759801
														0.0118608		0.0115732				0.00514515
														0.0129547		0.0149675				0.00523165
														0.0147995		0.014403				0.00760184
														0.0125846		0.0109321				0.00641918
														0.013736		0.0150834				0.00823231
														0.0132792		0.012804				0.00756153
														0.0154638		0.0143236				0.0070271
														0.0149864		0.0150285				0.0066732
														0.015334		0.0102726				0.00648726
														0.0158117		0.0123099				0.00659276
														0.0147154		0.0172968				0.00726629
														0.0166225		0.0129262				0.00548662
														0.0154951		0.016121				0.0081026
														0.010162		0.0169119				0.00747269
														0.0110587		0.0156541				0.00641707
														0.0144676		0.0143225				0.00636494
														0.0155411		0.0158893				0.0071772
														0.0128162		0.0144423				0.00504168
														0.0140672		0.0182691				0.0051303
														0.0117703		0.0158876				0.00611354
														0.01317		0.017407				0.00590471
														0.0133648		0.0180134				0.00673383
														0.0137617		0.0158087				0.00704933
														0.0127054		0.0144171				0.00744059
														0.0120475		0.0190651				0.00585151
														0.0159994		0.0158216				0.00656739
														0.0154679		0.0199434				0.00642023
														0.0123505		0.0192858				0.00705833
														0.0116111		0.0122724				0.00718461
														0.0138321		0.0153795				0.00714392
														0.0130703		0.0209462				0.00705806
														0.0143934		0.0186612				0.00755859
														0.0141544		0.0177351				0.00667548
														0.0163421		0.0196632				0.00740957
														0.0118068		0.0172421				0.00775123
														0.0111543		0.017257				0.00780937
														0.0150554		0.0191422				0.00835196
														0.0140872		0.0191067				0.00876308
														0.00808924		0.019701				0.00600435
														0.00867996		0.0150289				0.00637689
														0.00856954		0.0144002				0.00677253
														0.0113351		0.019388				0.00685373
														0.0107818		0.0152384				0.00709084
														0.0125801		0.0187267				0.00754556
														0.0133789		0.0193789				0.00700781
														0.0158889		0.0137163				0.00632278
														0.0149025		0.0163589				0.00562223
														0.0159999		0.0139421				0.00625484
														0.0139793		0.0139197				0.00598543
														0.0139208		0.0147646				0.00585242
														0.0144405		0.0175981				0.00466386
														0.0139754		0.0200371				0.00428019
														0.0160126		0.0140025				0.00512867
														0.0138582		0.0179549				0.00627489
														0.0132442		0.0190476				0.00570244
														0.0167247		0.0219045				0.00566328
														0.0140168		0.0206073				0.00504209
														0.0154896		0.0188477				0.00639403
														0.0151744		0.0179979				0.00554489
														0.0128625		0.0211396				0.00567852
														0.014132		0.017187				0.00714563
														0.0126408		0.0173522				0.0047523
														0.0150045		0.017992				0.00514199
														0.0151109		0.0171254				0.0061303
														0.0149705		0.0144253				0.00452802
														0.0127584		0.0254589				0.0050239
														0.011846		0.0219027				0.00520743
														0.0115399		0.0216398				0.00624664
														0.0125137		0.0126067				0.00656433
														0.0120336		0.012148				0.00570322
														0.011451		0.0137708				0.00714588
														0.0119374		0.0128398				0.00676076
														0.0117636		0.0152387				0.00651048
														0.0117726		0.0140891				0.00604383
														0.0111941		0.0126004				0.00532978
														0.0118672		0.0125453				0.00674598
														0.0122633		0.0127968				0.00709067
														0.0118194		0.0145358				0.00646743
														0.0137706		0.0111583				0.00552879
														0.0116683		0.0114203				0.00672563
														0.014492		0.0120533				0.0057305
														0.0126513		0.0107119				0.00561377
														0.0137736		0.0108691				0.00622469
														0.0129565		0.0130734				0.00604497
														0.0107616		0.0122387				0.00688401
														0.013527		0.0138456				0.00583488
														0.0144458		0.0175831				0.00614858
														0.0141162		0.015527				0.00631511
														0.0120679		0.0119728				0.00707666
														0.0139337		0.0123459				0.00762419
														0.0108662		0.0174133				0.0067128
														0.0116897		0.0186267				0.00605229
														0.0126333		0.0113317				0.00749954
														0.0134126		0.0117277				0.00518247
														0.0114254		0.0161183				0.00715025
														0.0115133		0.0152406				0.00705203
														0.0144315		0.014488				0.00671108
														0.0124673		0.0143602				0.0054781
														0.0125162		0.0134679				0.00661294
														0.0111148		0.0140794				0.00610565
														0.0118397		0.012661				0.00674865
														0.0160031		0.0144059				0.00710492
														0.0126327		0.0128935				0.00541981
														0.0126834		0.0118588				0.00560862
														0.0143038		0.0117784				0.00712792
														0.0135712		0.0148322				0.00608437
														0.0128194		0.0169066				0.00582586
														0.0128181		0.0159043				0.00561811
														0.0169513		0.0172185				0.00589371
														0.0143644		0.0194586				0.00598217
														0.014284		0.0179609				0.00629717
														0.0161924		0.0151617				0.00608403
														0.0135174		0.0147603				0.00604483
														0.014457		0.0154815				0.00614181
														0.0138375		0.0148361				0.00778135
														0.0111573		0.0171547				0.00639361
														0.0149133		0.0165393				0.00710682
														0.0145801		0.0138707				0.00672113
														0.0143634		0.0149448				0.00621427
														0.014233		0.0147594				0.00569367
														0.0168553		0.0142577				0.00697654
														0.0157072		0.011645				0.00711283
														0.0174586		0.0186987				0.00605201
														0.0106874		0.0190904				0.00615079
														0.0117823		0.014165				0.00638161
														0.0102225		0.013911				0.00663318
														0.00906402		0.0178656				0.00590238
														0.0109198		0.0172138				0.00590284
														0.0112586		0.0138166				0.00980046
														0.0118325		0.0117778				0.00545112
														0.0108065		0.0150502				0.00717307
														0.00886968		0.0161561				0.0064475
														0.00864478		0.0159741				0.00622175
														0.0113294		0.0161287				0.00594255
														0.0118889		0.013753				0.00709244
														0.0144444		0.0142258				0.00639795
														0.0141189		0.0168882				0.00597123
														0.0157161		0.0159463				0.00641582
														0.0158398		0.0132648				0.00536289
														0.013892		0.0190779				0.00791404
														0.0152446		0.0172796				0.00757459
														0.0140037		0.017483				0.0061991
														0.0132695		0.0162205				0.00612128
														0.0148146		0.0184421				0.00499564
														0.015493		0.0190312				0.00539036
														0.0124149		0.0189076				0.00779143
														0.0118954		0.0198693				0.00516969
														0.0162374		0.0156026				0.00572877
														0.0151294		0.019873				0.0053419
														0.014809		0.0198728				0.00644894
														0.0148643		0.0207043				0.00598061
														0.0104719		0.0183904				0.00545991
														0.0118738		0.0183008				0.00696294
														0.0150689		0.0172837				0.00576749
														0.0155708		0.0198722				0.00640271
														0.0104622		0.0200234				0.00662396
														0.0100573		0.0205628				0.00560601
														0.0168121		0.0212012				0.00667239
														0.0182609		0.0231165				0.00571902
														0.0170428		0.0214327				0.00476326
														0.0155322		0.0214249				0.00626418
														0.0119197		0.0213872				0.00498136
														0.0114236		0.0194918				0.00586101
														0.0149577		0.019562				0.00488673
														0.0145442		0.0217432				0.00614805
														0.0143153		0.0143784				0.00738428
														0.0161006		0.0134658				0.00632276
														0.0123847		0.0216017				0.00600816
														0.0114839		0.0105861				0.00625078
														0.0151413		0.0111815				0.00703372
														0.0145892		0.0156709				0.0076325
														0.0142824		0.0172472				0.00497979
														0.0154728		0.0168857				0.00497115
														0.0137201		0.0184493				0.00527312
														0.0128307		0.0170866				0.00664449
														0.0117356		0.0210119				0.00665898
														0.0132462		0.0228125				0.00435484
														0.0140641		0.0192561				0.00456422
														0.0137021		0.0197052				0.00571148
														0.0143287		0.0176034				0.00549197
														0.0108752		0.0173757				0.0042415
														0.0109377		0.0171335				0.00436236
														0.0124502		0.0196264				0.00619636
														0.0134602		0.019895				0.00632509
														0.0136719		0.0162842				0.00448059
														0.0111019		0.016822				0.00428024
														0.0103373		0.0160989				0.00585069
														0.0146823		0.0163427				0.00613456
														0.0155829		0.01163				0.00557318
														0.0141848		0.0136731				0.00607796
														0.0197563		0.0200665				0.00489665
														0.0168171		0.0222741				0.00516858
														0.0139112		0.0207714				0.00596251
														0.0148314		0.0157688				0.00558243
														0.012298		0.0162853				0.0052688
														0.0119146		0.0152019				0.00465263
														0.0131255		0.0171152				0.00495448
														0.011394		0.013969				0.00641103
														0.0136676		0.0169758				0.00629687
														0.0129961		0.0163278				0.00579923
														0.0149496		0.0181131				0.00625032
														0.0139603		0.0130947				0.00744192
														0.0145251		0.0152343				0.0071013
														0.0139718		0.0129686				0.00559363
														0.0155834		0.0145982				0.00494408
														0.0161566		0.013785				0.00692618
														0.01556		0.0120489				0.00664749
														0.0145903		0.0129187				0.00822268
														0.0153143		0.0138135				0.00745116
														0.0150767		0.0147467				0.00641426
														0.013095		0.0106371				0.00681548
														0.0148034		0.0155424				0.00681326
														0.0125943		0.0125433				0.00664974
														0.0131121		0.0151358				0.00499388
														0.0133153		0.0143269				0.00532842
														0.0133671		0.0153096				0.00478938
														0.0135609		0.0114409				0.0050176
														0.0144571		0.0112158				0.00494147
														0.0130524		0.014684				0.00525031
														0.0131873		0.0119828				0.00506664
														0.0146325		0.0104307				0.00586103
														0.0150093		0.0148844				0.0056018
														0.00925772		0.0121383				0.00784447
														0.00941083		0.0124379				0.00583463
														0.00938517		0.0139458				0.00606517
														0.00929366		0.0114847				0.00606831
														0.0108495		0.0140821				0.0056381
														0.0108093		0.0142475				0.0071927
														0.0120829		0.0131106				0.00762391
														0.0130162		0.0103508				0.00645564
														0.0132768		0.0106259				0.00668675
														0.012918		0.0134738				0.00661084
														0.0128562		0.0138142				0.00597385
														0.0109045		0.0120815				0.00792493
														0.0149339		0.0152186				0.00805437
														0.0143925		0.0113575				0.00536578
														0.0155583		0.0144586				0.00579882
														0.0130934		0.0135344				0.0082593
														0.0129926		0.0113103				0.00789179
														0.0137256		0.0141394				0.00610979
														0.0152033		0.0144775				0.00614445
														0.0147823		0.0178551				0.00771058
														0.0104949		0.013379				0.00783574
														0.0134347		0.0103164				0.00611737
														0.0136144		0.00891978				0.0072935
														0.017323		0.0192606				0.00585681
														0.0138225		0.0091626				0.00644166
														0.0132782		0.00857437				0.00666406
														0.0126964		0.0154271				0.00587148
														0.0133466		0.0174539				0.00575047
														0.0130115		0.0141121				0.0085634
														0.0130155		0.0131857				0.00816146
														0.0157887		0.0126036				0.00639579
														0.0158436		0.016872				0.00603423
														0.0140053		0.0170701				0.0067147
														0.012432		0.0128936				0.00618607
														0.0153493		0.0122693				0.00648395
														0.0159975		0.0140673				0.00668641
														0.0135519		0.0165119				0.00608264
														0.0117719		0.0139001				0.00633869
														0.0148979		0.0111928				0.00662415
														0.0135633		0.0153792				0.00590622
														0.0144745		0.0145716				0.00476621
														0.0120214		0.0146605				0.00484554
														0.0114818		0.0175599				0.00771483
														0.0149075		0.0163926				0.00741514
														0.0142387		0.0174879				0.00729995
														0.0158055		0.0166495				0.00719776
														0.0146264		0.0147781				0.00571872
														0.0140332		0.0116937				0.00576736
														0.0144184		0.0143055				0.00695154
														0.0136247		0.0164442				0.00727187
														0.013062		0.0175755				0.00520699
														0.0126212		0.0131044				0.00540429
														0.0137765		0.0195614				0.00785622
														0.0146678		0.0185279				0.00823337
														0.0147623		0.0166919				0.00869143
														0.0121681		0.0149296				0.00606975
														0.0138949		0.0174627				0.00626798
														0.0137874		0.0189049				0.00503755
														0.013392		0.013721				0.00502073
														0.0148787		0.010258				0.00598572
														0.0158714		0.0137518				0.0065224
														0.0137436		0.0144847				0.00572388
														0.0172951		0.0147174				0.00580864
														0.0156878		0.0136768
														0.0147617		0.0189168
														0.0150105		0.0147158
														0.0145294		0.01504
														0.0119701		0.0103398
														0.0120843		0.0145445
														0.0103635		0.0142657
														0.0105519		0.0141798
														0.010154		0.013495
														0.0127891		0.0151143
														0.011842		0.0144725
														0.0135825		0.018315
														0.0109903		0.0151996
														0.0149314		0.0120972
														0.0160916		0.0132188
														0.0152175		0.0153224
														0.017507		0.022974
														0.0128689		0.0168587
														0.0158205		0.0150602
														0.0125146		0.013075
														0.0133001		0.0132728
														0.0116132		0.0161882
														0.0111619		0.0166341
														0.00957661		0.018007
														0.00898895		0.0194442
														0.00960863		0.0155602
														0.00933252		0.016184
														0.0116293		0.0178605
														0.0122785		0.0210572
														0.00952872		0.0175229
														0.0128601		0.0183943
														0.0126082		0.0150169
														0.0130336		0.0188583
														0.0142265		0.0168156
														0.0116291		0.0136694
														0.0135382		0.0144056
														0.0168629		0.0150581
														0.0164235		0.0125991
														0.0122385		0.0150569
														0.0139044		0.00981908
														0.0125489		0.014126
														0.0132418		0.0146651
														0.014998		0.0134711
														0.0131936		0.0173039
														0.0125873		0.0168077
														0.0135268		0.0151232
														0.0114203		0.0144744
														0.0106529		0.0153159
														0.00985146		0.015645
														0.00970379		0.0172689
														0.0093768		0.0174315
														0.0103266		0.0168393
														0.011283		0.0152232
														0.012471		0.0144895
														0.0141487		0.013826
														0.0149527		0.0174155
														0.013038		0.0151088
														0.0133941		0.0145201
														0.0119345		0.0144121
														0.0137063		0.0152585
														0.013485		0.0154771
														0.0117856		0.0147027
														0.0130315		0.01467
														0.0113767		0.0121724
														0.0121001		0.00998413
														0.0127001		0.0171623
														0.0138109		0.01836
														0.0103352		0.012381
														0.0108637		0.012362
														0.0139535		0.018671
														0.014707		0.0176362
																0.0159656
																0.0173299
																0.0103998
																0.0118276
																0.0156529
																0.0142503
																0.0162463
																0.0160758
																0.0182618
																0.0188067
																0.0150537
																0.0160897
																0.0211982
																0.0154835
																0.0204986
																0.0186887
																0.0206989
																0.0216095
																0.0195571
																0.0197733
																0.0184525
																0.0151418
																0.0151806
																0.0143256
																0.0143195
																0.0162821
																0.015245
																0.0164355
																0.0160704
																0.0192642
																0.0193393
																0.0148178
																0.0169566
																0.0166223
																0.0160955
																0.0168469
																0.0191852
																0.0204064
																0.0127354
																0.0135299
																0.0167738
																0.020504
																0.01809
																0.0209524
																0.0214421
																0.016589
																0.0162775
																0.0148081
																0.0146162
																0.0175739
																0.017167
																0.0167505
																0.0188954
																0.0153938
																0.0168881
																0.0141303
																0.0146799
																0.0142402
																0.0148586
																0.0151165
																0.013995
																0.0139366
																0.0135708
																0.0207842
																0.0189129
																0.0198123
																0.017344
																0.0149869
																0.0156701
																0.0190492
																0.0208572
																0.0200134
																0.0187719
																0.0135004
																0.0142077
																0.020022
																0.0183491
																0.0114273
																0.0114258
																0.0168199
																0.0160674
																0.01415
																0.015835
																0.0158333
																0.0179703
																0.0186473
																0.0148912
																0.0161456
																0.0160209
																0.0152036
																0.016877
																0.0141954
																0.0157793
																0.0109302
																0.0139989
																0.0153125
																0.0108136
																0.0155754
																0.0185636
																0.013943
																0.0174338
																0.0171618
																0.016372
																0.00984558
																0.0147388
																0.0116679
																0.0124626
																0.0180415
																0.0179478
																0.0113994
																0.0183211
																0.0117404
																0.0128693
																0.0113983
																0.0113111
																0.0130717
																0.0134489
																0.0138655
																0.0150516
																0.0125521
																0.0128281
																0.0160626
																0.0140529
																0.0119043
																0.011803
																0.0123805
																0.0114099
																0.0143047
																0.0129314
																0.0159217
																0.0144692
																0.0141905
																0.0115943
																0.0158187
																0.0141211
																0.0162884
																0.0138454
																0.0169014
																0.0134099
																0.0195952
																0.0123901
																0.0171992
																0.0114806
																0.0214297
																0.0160232
																0.017441
																0.0189828
																0.0188907
																0.0152877
																0.0191419
																0.0194428
																0.0199863
																0.0136187
																0.0132411
																0.0199968
																0.0213801
																0.0154447
																0.0147445
																0.0151921
																0.0184861
																0.0217442
																0.0179641
																0.0113729
																0.0171675
																0.0144476
																0.0207042
																0.0149935
																0.0218201
																0.0143514
																0.0102573
																0.0156129
																0.0190894
																0.0185176
																0.0188949
																0.0118998
																0.0210922
																0.0136925
																0.0187487
																0.0194543
																0.0192872
																0.0152802
																0.0151916
																0.0152526
																0.0199524
																0.0125547
																0.0179615
																0.0140956
																0.0217797
																0.0228303
																0.0168387
																0.0139013
																0.0145358
																0.0160606
																0.0214379
																0.0162472
																0.0157511
																0.0160916
																0.0133271
																0.0172764
																0.0192586
																0.0175425
																0.0149857
																0.0200479
																0.0164856
																0.0220853
																0.0186203
																0.0162695
																0.0108138
																0.0160075
																0.0159679
																0.0204581
																0.0246566
																0.0188439
																0.0201751
																0.0165455
																0.00947626
																0.0240085
																0.0208557
																0.0165368
																0.0229032
																0.0113985
																0.00958256
																0.0200873
																0.0107909
																0.024227
																0.0182727
																0.021733
																0.0119666
																0.0133387
																0.0186957
																0.0206639
																0.0156247
																0.0148501
																0.0234034
																0.0156156
																0.0176132
																0.0177953
																0.0187183
																0.015811
																0.0196559
																0.0181263
																0.016619
																0.0172573
																0.0159664
																0.0166885
																0.0203351
																0.0177245
																0.0183508
																0.0161259
																0.0158817
																0.0163657
																0.0158496
																0.0192512
																0.0196128
																0.01388
																0.020031
																0.0164326
																0.0184593
																0.0232766
																0.0175626
																0.0172883
																0.0215104
																0.0227568
																0.0155473
																0.0189451
																0.0128944
																0.0203607
																0.0169711
																0.0190392
																0.0173081
																0.0125318
																0.0117745
																0.0153036
																0.0140136
																0.0136012
																0.0133127
																0.0178264
																0.0183428
																0.0154378
																0.0156252
																0.0113277
																0.0107245
																0.0158259
																0.0148556
																0.016944
																0.0192108
																0.0204878
																0.0225162
																0.0139192
																0.0128964
																0.0191671
																0.0226689
																0.0180698
																0.0171399
																0.0179652
																0.0172525
																0.0209378
																0.0193131
																0.0140144
																0.0133548
																0.015566
																0.0150504
																0.0140162
																0.0138052
																0.013097
																0.0160706
																0.0143874
																0.0137785
																0.0172073
																0.0131539
																0.0123546
																0.017613
																0.0168132
																0.0172474
																0.0175738
																0.0174906
																0.0140664
																0.0181381
																0.013697
																0.0138526
																0.0169733
																0.0151416
																0.0177271
																0.0181181
																0.0192514
																0.017034
																0.0116624
																0.0113488
																0.0189797
																0.0194361
																0.0164599
																0.0182505
																0.0203918
																0.0208677
																0.0189072
																0.0187387
																0.0178384
																0.0169102
																0.0201681
																0.0156582
																0.0158617
																0.0215626
																0.0200276
																0.0228096
																0.0238892
																0.0223535
																0.0163818
																0.0197913
																0.0209069
																0.013986
																0.0154132
																0.0152598
																0.015181
																0.0172658
																0.0156943
																0.0162895
																0.0182379
																0.0200178
																0.0132286
																0.0118996
																0.0169085
																0.0162908
																0.015514
																0.0163074
																0.0146457
																0.0153055
																0.0137673
																0.0191231
																0.0219547
																0.0148703
																0.0141186
																0.0136205
																0.0159274
																0.0164072
																0.0176326
																0.0149185
																0.0152358
																0.0175546
																0.0211311
																0.0197023
																0.0218421
																0.0211613
																0.0224168
																0.0211554
																0.025083
																0.0197561
																0.0189735
																0.0172412
																0.0175516
																0.0234953
																0.0256531
																0.0191722
																0.0207367
																0.0168686
																0.0168067
																0.0150105
																0.0154741
																0.0198044
																0.0247856
																0.0246708
																0.0185265
																0.0199632
																0.0146314
																0.0138654
[truncated: 298 more rows]
