# Supplementary material for: Homeostatic control of cell wall hydrolysis by the WalRK two-component signaling pathway in Bacillus subtilis
Source: eLife. 2019 Dec 6;8:e52088. doi: 10.7554/eLife.52088 (PMC7299342; doi:10.7554/eLife.52088)
Supplement: Figure 4—source data 4. [file elife-52088-fig4-data4.xlsx]

## Sheet: Figure 4F lytE overexpresion
Figure 4F - lytE overexpression (PiseA); data from getSignal1 script
signal_t0_bGD389_731		signal_t0_bGD389_815		signal_t0_bGD389_67		signal_t0_bGD294_731		signal_t0_bGD294_815		signal_t0_bGD294_67		signal_t0_bGD110_731		signal_t0_bGD110_815		signal_t0_bGD110_67		signal_30m_bGD389_731		signal_30m_bGD389_815		signal_30m_bGD389_67		signal_30m_bGD294_731		signal_30m_bGD294_815		signal_30m_bGD294_67		signal_30m_bGD110_731		signal_30m_bGD110_815		signal_30m_bGD110_67
0.00285828		0.00573879		0.00208613		0.00225489		0.00649803		0.00224096		0.00240857		0.00253803		0.00214252		0.00244168		0.00267		0.00212013		0.0105161		0.00540964		0.0085465		0.00280452		0.00240188		0.00196553
0.00281052		0.0060601		0.00208056		0.00240761		0.00566711		0.00220707		0.00239231		0.00249067		0.0021501		0.00311938		0.00258963		0.00202225		0.0116735		0.00465975		0.0134506		0.0023605		0.00243836		0.00221497
0.00250606		0.00599742		0.00220074		0.0027098		0.00915042		0.00222253		0.00232752		0.00235343		0.00225545		0.00262106		0.00243191		0.0020206		0.00879756		0.00635661		0.00886731		0.00238576		0.00243018		0.00207577
0.00280744		0.00624815		0.00211301		0.00262075		0.00765161		0.00219656		0.00241084		0.00245529		0.00219652		0.00250727		0.00270825		0.00213732		0.0114144		0.00827438		0.00944763		0.00222292		0.00262375		0.00202806
0.00276896		0.00517851		0.00211557		0.0024051		0.00619191		0.00205074		0.00239479		0.00258144		0.00226871		0.00256677		0.002616		0.00207966		0.0114293		0.00717756		0.0106563		0.00239173		0.00243837		0.00190733
0.00247381		0.00621723		0.00198333		0.00249923		0.00939782		0.00203025		0.00238165		0.00244085		0.00236273		0.00255894		0.00273997		0.00208839		0.00974683		0.00856687		0.0114262		0.00245692		0.00247283		0.0019199
0.00252084		0.00650203		0.0022379		0.00226312		0.00926737		0.00207082		0.00253599		0.00236754		0.00228559		0.00247038		0.00272953		0.00241521		0.0104103		0.0121881		0.00595091		0.00231694		0.00248036		0.00221305
0.00253626		0.00589798		0.00226648		0.00248555		0.00556794		0.00207114		0.00252967		0.00266064		0.0021547		0.00290696		0.00249496		0.00201902		0.0106736		0.0118945		0.00507126		0.00228659		0.00246232		0.00225036
0.00251298		0.00630777		0.00201842		0.00248632		0.00665806		0.00222323		0.00256409		0.0025595		0.00210298		0.00281806		0.0027158		0.00233369		0.0109325		0.00754184		0.00459576		0.00230288		0.00251858		0.00204307
0.00306725		0.00598924		0.00229032		0.0023839		0.00674794		0.00216262		0.00251937		0.0025746		0.00232122		0.00288253		0.00258567		0.00209826		0.0113102		0.00711567		0.00486644		0.00228438		0.00237163		0.00206525
0.00251947		0.00631978		0.0022632		0.00278616		0.00613872		0.00207627		0.00244051		0.00222269		0.00218648		0.00310053		0.00278607		0.00219274		0.0102621		0.0109844		0.00605869		0.00244865		0.00252151		0.00213993
0.00260082		0.00614008		0.00214355		0.00252691		0.00615762		0.00239587		0.00256888		0.00254386		0.00213345		0.00240263		0.00261019		0.00210346		0.0120062		0.00601047		0.0121331		0.00234507		0.00261509		0.00207582
0.00254958		0.00590817		0.00219896		0.00251674		0.00644426		0.00215502		0.00253002		0.00252249		0.00219499		0.00290201		0.00302336		0.00203925		0.0112786		0.0144217		0.0126989		0.00237034		0.00232092		0.00209654
0.00261207		0.00598459		0.00221204		0.00335237		0.0060145		0.00225707		0.00258807		0.00242292		0.00224446		0.00235263		0.00256657		0.00217092		0.0110928		0.00810608		0.0131758		0.00220758		0.00240837		0.00215478
0.00264001		0.00596337		0.00207311		0.00252287		0.00639145		0.00242888		0.00261987		0.0023661		0.0022098		0.00271806		0.00239588		0.00230199		0.0138984		0.00992576		0.0096424		0.00248883		0.00227369		0.00185503
0.0025762		0.00587899		0.0019401		0.00253812		0.006262		0.00232197		0.00253585		0.0023978		0.0019449		0.00266867		0.00257086		0.00232948		0.0138056		0.00729316		0.0118958		0.00249068		0.0024816		0.00192711
0.00263456		0.00605538		0.00193932		0.00229594		0.00554557		0.00226925		0.0026046		0.00266095		0.00224462		0.00264675		0.00251566		0.00202624		0.013043		0.00727561		0.0093848		0.00247316		0.00236397		0.00195837
0.00266878		0.00602953		0.00199544		0.00242488		0.00591221		0.00225316		0.00241021		0.00274168		0.0022167		0.00277791		0.00271625		0.00218463		0.0140198		0.0103308		0.0109971		0.0024416		0.00232143		0.00215356
0.00244782		0.00682271		0.00201877		0.00247567		0.00379045		0.00222777		0.00260045		0.00260595		0.00220362		0.00277896		0.00298		0.00199606		0.0133891		0.0126448		0.0109919		0.00229425		0.00236837		0.00217401
0.00267707		0.00617393		0.00198382		0.00244745		0.00582636		0.00214451		0.00254865		0.00257745		0.00215197		0.00265663		0.00283601		0.00211881		0.00791307		0.0115747		0.0110042		0.00231048		0.00246701		0.00198879
0.0027924		0.00601987		0.0021421		0.0023986		0.00609502		0.00211442		0.00242085		0.00257944		0.00212245		0.00317007		0.00288556		0.00196756		0.0078909		0.00943461		0.0109429		0.00229308		0.00246423		0.00202651
0.00276361		0.00599925		0.00219112		0.00243757		0.00591811		0.00224962		0.00246723		0.0025287		0.00217219		0.00272258		0.00285327		0.00216123		0.013595		0.0117341		0.0104223		0.00231512		0.00228181		0.00202936
0.00289873		0.00655347		0.001985		0.00239473		0.00566881		0.0021732		0.00245197		0.00250514		0.00207907		0.00288323		0.00300294		0.00215991		0.0129024		0.0112346		0.00989217		0.00221195		0.00219239		0.00204228
0.00299107		0.00692073		0.00197847		0.00240378		0.00570241		0.00225358		0.00248047		0.00256157		0.00215478		0.0025708		0.00272127		0.0021954		0.0128432		0.00834528		0.00963166		0.00222442		0.00227088		0.00201941
0.0028729		0.00728666		0.00217425		0.00242276		0.00660687		0.00209626		0.00245015		0.00260183		0.00229629		0.0025616		0.0027393		0.00207022		0.0117406		0.0125703		0.00960691		0.00255561		0.00244578		0.00199635
0.00278674		0.00682694		0.00216361		0.00234958		0.00824973		0.00227486		0.0025285		0.00228063		0.00208035		0.00243773		0.00249333		0.00216412		0.0108278		0.0133087		0.009989		0.00246901		0.00239592		0.00197426
0.00237646		0.00689765		0.0020185		0.00235974		0.00666624		0.00214466		0.00249792		0.00224498		0.00210173		0.00259006		0.00284902		0.00220734		0.0126802		0.0136146		0.00991091		0.00243578		0.00237653		0.00196964
0.00255823		0.00689723		0.00203696		0.00255434		0.00827092		0.00223036		0.00262853		0.00244086		0.00205664		0.0024993		0.00273682		0.00223921		0.0136123		0.0114672		0.0125721		0.00227523		0.00238701		0.00194683
0.00247833		0.00755079		0.00215464		0.00236856		0.00624404		0.00222135		0.00267331		0.0024578		0.00205952		0.00254531		0.00294575		0.00214504		0.0122188		0.0113947		0.012902		0.00234363		0.00280363		0.00217022
0.00247501		0.0067164		0.00216439		0.0025018		0.00739335		0.0022887		0.00267442		0.0023892		0.00204093		0.00295849		0.00272558		0.00203218		0.0124924		0.0132699		0.0123306		0.00226327		0.00282517		0.00218445
0.00231944		0.00713524		0.00217882		0.00253276		0.00737019		0.00223492		0.00261163		0.00249951		0.0021646		0.00236149		0.00300297		0.00204748		0.0144492		0.0136079		0.00902548		0.0022596		0.00238408		0.00212823
0.00244162		0.00731483		0.00215344		0.00238791		0.00633212		0.0020757		0.00265404		0.00229646		0.00205227		0.00314061		0.00238721		0.00208506		0.0118823		0.0134502		0.00947588		0.00236734		0.00244049		0.00204502
0.00242772		0.00808342		0.00204129		0.00240044		0.0073004		0.00207652		0.00252756		0.00252128		0.00218829		0.00296682		0.00261868		0.00214345		0.00971823		0.0117231		0.0119948		0.00227422		0.00243538		0.00189715
0.00259339		0.008075		0.00204733		0.00276322		0.00669075		0.00220708		0.00221176		0.00238709		0.00225038		0.00260517		0.00294391		0.00215372		0.00890312		0.00912424		0.0117546		0.00227284		0.00241141		0.00196963
0.00283004		0.00969675		0.00223484		0.0027803		0.00863939		0.0021855		0.00218771		0.00244688		0.00229696		0.00235583		0.00235718		0.00201803		0.00968217		0.0118907		0.00960796		0.00249797		0.00240682		0.00197435
0.00340901		0.00560712		0.0022862		0.00238049		0.00897129		0.00217361		0.00231252		0.00247268		0.00218585		0.00270682		0.00234674		0.00202487		0.0086253		0.0118405		0.0124985		0.00248239		0.00253698		0.00198846
0.00356376		0.00594297		0.00220232		0.00248664		0.00657231		0.00223767		0.00253135		0.00244183		0.00227175		0.00268095		0.00262674		0.0022155		0.0087426		0.0121521		0.0123136		0.00232128		0.00253469		0.00196638
0.00332657		0.00586994		0.00220189		0.00251723		0.00650388		0.00221294		0.00261933		0.0022352		0.00204996		0.00235372		0.00260262		0.00218683		0.0106986		0.012604		0.011604		0.00232562		0.00238318		0.00202828
0.00302891		0.00618792		0.00226753		0.00251226		0.00561858		0.00226611		0.00291479		0.00225286		0.00220658		0.00235191		0.00262962		0.00213734		0.0108682		0.0107341		0.0113584		0.00235651		0.00233369		0.00201413
0.00272775		0.00664386		0.00227031		0.00243827		0.00580549		0.00222142		0.002424		0.00239479		0.0022204		0.00248557		0.00259798		0.00213867		0.0131116		0.0117229		0.0100877		0.00234309		0.00245014		0.00217309
0.00282054		0.00721278		0.00238143		0.00243079		0.00610576		0.00213978		0.0024306		0.00247625		0.00219849		0.00256301		0.00269088		0.00204341		0.0125768		0.0137303		0.0128209		0.00236466		0.00243056		0.00221372
0.00249752		0.00662046		0.00237138		0.00237848		0.00749007		0.00210649		0.00228374		0.0024864		0.00221597		0.00254632		0.00255346		0.00202355		0.0108196		0.013675		0.0122125		0.00234078		0.00237026		0.00229057
0.00253789		0.00570912		0.0023003		0.00235974		0.00626106		0.00210352		0.00220165		0.00254851		0.00214196		0.00256011		0.00265295		0.0022342		0.0106293		0.0135947		0.0113455		0.00239271		0.00229885		0.00231001
0.00272291		0.00647002		0.00222539		0.0025497		0.0065289		0.00210388		0.00221172		0.00250535		0.00209244		0.00263546		0.00299269		0.00227404		0.0123779		0.0161608		0.0110241		0.00234639		0.00237716		0.00259114
0.00275408		0.00665802		0.00212573		0.00245343		0.00653686		0.00210202		0.00253059		0.00242857		0.00220233		0.00248162		0.00268109		0.00213921		0.0115806		0.00496579		0.010976		0.00237496		0.00234075		0.00227328
0.00306829		0.00632989		0.00213302		0.00256117		0.00561492		0.00211266		0.0023221		0.00249222		0.00228863		0.00248907		0.00245672		0.00217248		0.0119277		0.00529267		0.0112417		0.00237485		0.00240099		0.0022374
0.00318598		0.00614059		0.001916		0.00245891		0.0058273		0.00216316		0.00266943		0.0024491		0.00218562		0.0024474		0.00260864		0.00212517		0.0112444		0.00973581		0.0111166		0.00236617		0.00229243		0.0022273
0.00241789		0.00601421		0.00196816		0.0023385		0.00594661		0.00218189		0.00264491		0.00245049		0.00219245		0.00245789		0.00267084		0.00220489		0.0114461		0.00965241		0.011835		0.00234431		0.00235539		0.00228439
0.00260139		0.00784443		0.00208863		0.00245204		0.00593065		0.00217997		0.00236061		0.00238997		0.00226392		0.00246723		0.00281429		0.00209861		0.00940883		0.00747534		0.0112573		0.00229776		0.00228413		0.00230526
0.00238802		0.00898097		0.0020877		0.00254629		0.00594464		0.00236857		0.00242005		0.0024151		0.00230862		0.00229378		0.00275703		0.0021143		0.00869565		0.00705853		0.00492427		0.00228874		0.0022921		0.00227106
0.00248344		0.00934082		0.0022008		0.0023839		0.00592722		0.00240705		0.00235161		0.00247338		0.00217778		0.00283442		0.00279842		0.00217844		0.0124009		0.0106043		0.00464363		0.00442609		0.0024767		0.00230695
0.0025926		0.010782		0.00218433		0.00244579		0.00640845		0.00208608		0.0024689		0.0027552		0.00225471		0.00298349		0.00249917		0.00226386		0.00715418		0.0104733		0.0120195		0.00224059		0.00247602		0.00227466
0.00250013		0.00668858		0.00221459		0.00237211		0.00757416		0.00217487		0.00231992		0.00270645		0.00217953		0.00265566		0.00245212		0.00225739		0.0109524		0.00619275		0.0119908		0.00262093		0.00234525		0.00234472
0.00248641		0.00822044		0.0021806		0.00231811		0.0069789		0.00211997		0.00236965		0.00252872		0.00221234		0.00263718		0.0024363		0.00206907		0.00795594		0.00761091		0.00649754		0.00266253		0.00237118		0.00250168
0.00288293		0.00822095		0.00226997		0.00231174		0.00955717		0.00205136		0.00236158		0.00256639		0.00226789		0.0026112		0.00287198		0.00244082		0.0109415		0.0125936		0.0061592		0.00233696		0.00239913		0.00220512
0.00310781		0.00598502		0.00228622		0.00231323		0.0100845		0.00214531		0.00237339		0.00262276		0.00209013		0.00226225		0.00292335		0.00241374		0.0123041		0.0118861		0.0102324		0.00228465		0.00244803		0.00236874
0.00235913		0.00664833		0.00222396		0.00229783		0.00893105		0.00213622		0.00229944		0.00248012		0.00229579		0.00226506		0.00248491		0.00220498		0.012434		0.00573482		0.00952626		0.0024239		0.00257107		0.00235984
0.00266602		0.00660153		0.00225429		0.00264779		0.0102365		0.00203019		0.00254431		0.00243732		0.00225271		0.00256515		0.00259686		0.0021834		0.0128604		0.00914783		0.00826871		0.00239438		0.00255899		0.00232854
0.00265846		0.00605472		0.00236898		0.00246531		0.00840315		0.00211017		0.00252553		0.00271698		0.00212782		0.00256294		0.00258524		0.00224542		0.0120993		0.0100392		0.0137052		0.00252514		0.00245339		0.00225994
0.00269176		0.00623481		0.00237366		0.00223493		0.00641743		0.00235269		0.00241373		0.0025828		0.00215249		0.00262807		0.00248632		0.00231569		0.0122176		0.00464949		0.0144723		0.00244668		0.0023744		0.00243864
0.00290411		0.00533634		0.00220188		0.00233306		0.00607328		0.00234027		0.00241483		0.00272658		0.00218245		0.0023696		0.00246273		0.00229996		0.0113134		0.00674928		0.00847876		0.00251999		0.00249262		0.00244849
0.00321412		0.0059761		0.00224167		0.00226373		0.00869718		0.00213424		0.00239906		0.00252297		0.00213085		0.00313379		0.00263748		0.0021649		0.0101534		0.0107714		0.00862991		0.00249542		0.00235702		0.00230411
0.00255891		0.00589459		0.00225847		0.00265985		0.00877102		0.00211451		0.00247648		0.00377731		0.00212002		0.00291907		0.00270084		0.00213962		0.0111595		0.00665659		0.00476223		0.002393		0.00285528		0.00229903
0.00282163		0.00612628		0.00230773		0.00256525		0.00766375		0.0020429		0.00253794		0.00271754		0.00209525		0.00220938		0.00276162		0.0022164		0.00869664		0.00707433		0.00778334		0.00270218		0.00279074		0.00225141
0.00275902		0.00631307		0.00210177		0.00221297		0.00655829		0.00224895		0.00241774		0.00262446		0.00208052		0.00248989		0.00255103		0.00228852		0.00687086		0.00633154		0.00826006		0.0025433		0.00232046		0.00224492
0.00238521		0.00608464		0.00216173		0.00243196		0.00623346		0.00226458		0.00227701		0.0026838		0.0022563		0.00286102		0.00252325		0.00228924		0.00936911		0.00683271		0.00846608		0.00245762		0.00239283		0.00221961
0.00228311		0.00746518		0.00220325		0.00240827		0.00592693		0.00210484		0.00236798		0.00237156		0.00234438		0.00267611		0.00264385		0.00212284		0.0130009		0.0087636		0.00850319		0.00225086		0.00240484		0.00219427
0.00264407		0.00602476		0.00219866		0.00230147		0.00613882		0.00215297		0.00226825		0.00282754		0.00229353		0.00219546		0.00271506		0.00204507		0.0136293		0.0100684		0.00595094		0.00227446		0.00243105		0.00196291
0.00247469		0.00619091		0.00210541		0.00228703		0.00555665		0.00219061		0.00242592		0.00267152		0.00221364		0.00227454		0.00273621		0.00206607		0.0128881		0.0113226		0.00592893		0.00222856		0.00260973		0.00204934
0.00248101		0.00610906		0.00211893		0.00251116		0.00642299		0.0022079		0.00237972		0.00239425		0.00235012		0.00269408		0.00261087		0.0023157		0.0131911		0.00858675		0.00548306		0.00237627		0.0026067		0.00213897
0.00275146		0.00603699		0.00212764		0.00238425		0.005747		0.00213487		0.00260723		0.00268733		0.00197902		0.00269069		0.00250172		0.00214413		0.0112048		0.00742763		0.0107494		0.0022787		0.00257084		0.00212635
0.0023318		0.00623537		0.00204367		0.00246413		0.00695746		0.00215449		0.00266458		0.00269487		0.00197832		0.00240178		0.00255276		0.00211856		0.011314		0.0130823		0.0117464		0.00236619		0.002519		0.00197558
0.00246661		0.00627987		0.00220748		0.00245996		0.00618759		0.00220268		0.00249891		0.00252552		0.00241579		0.00244512		0.00242927		0.00209062		0.00782701		0.00644184		0.0107505		0.00236324		0.00239185		0.00198624
0.00255766		0.0066003		0.00228083		0.00243911		0.00694751		0.00213593		0.002721		0.00245185		0.00240958		0.00237582		0.00249363		0.00217363		0.00791151		0.0102977		0.0109895		0.00240529		0.00243685		0.00202736
0.00259747		0.00529652		0.00216172		0.00233707		0.0063636		0.00216524		0.0024723		0.00243697		0.00233302		0.00231534		0.00251224		0.00211677		0.0120483		0.011063		0.0111523		0.00227153		0.00239287		0.00204347
0.00283676		0.00538518		0.00221285		0.00254194		0.00744876		0.00204121		0.00243752		0.00243345		0.00235776		0.00287515		0.00260699		0.00209527		0.0126543		0.0101324		0.00835618		0.00223997		0.00220374		0.00211312
0.00276643		0.00609935		0.00236636		0.00248483		0.00581791		0.00203568		0.00230776		0.0030299		0.00226012		0.00288443		0.00261933		0.00212872		0.00968225		0.00996591		0.00771503		0.00235857		0.00220663		0.00218113
0.00281627		0.0100306		0.00235141		0.00222542		0.00607558		0.00230793		0.00230756		0.00293069		0.0021749		0.00257342		0.0027473		0.00222305		0.00975171		0.00982356		0.0112976		0.00229023		0.0024324		0.00201441
0.00284632		0.00573396		0.00216842		0.00245331		0.00591459		0.00231934		0.00244504		0.00259255		0.00218452		0.00255134		0.00268449		0.00202992		0.0109446		0.0131929		0.0115526		0.00229122		0.00246163		0.00201114
0.00288257		0.00784367		0.00220834		0.00250988		0.00601739		0.00218157		0.00247586		0.00257833		0.00231236		0.00280183		0.00239452		0.00202178		0.00638386		0.0115386		0.0133211		0.0021989		0.00237354		0.00220999
0.00268353		0.00617861		0.0021706		0.00238678		0.00612906		0.00226416		0.00259805		0.00256361		0.00224885		0.00290054		0.0023424		0.0021758		0.00697177		0.0111432		0.0127799		0.0021875		0.00250352		0.00192978
0.00279114		0.0069562		0.00220421		0.00243737		0.00595091		0.00219816		0.00234364		0.0025722		0.00228334		0.00254929		0.00256197		0.00198713		0.0102567		0.0096254		0.00465224		0.00231462		0.00249382		0.0021223
0.00309949		0.00644734		0.00220292		0.00245631		0.0057774		0.00218802		0.00236021		0.00265735		0.00226914		0.00257141		0.00257188		0.00206049		0.0134081		0.0101609		0.00471816		0.00217035		0.00251336		0.00202014
0.00235304		0.00610718		0.0021595		0.00250258		0.00604053		0.00214213		0.00239366		0.00263337		0.00232965		0.00246256		0.00266727		0.00203108		0.00903395		0.0121745		0.00875922		0.00236395		0.00241445		0.00197047
0.00304011		0.00601384		0.00229603		0.00251571		0.00630844		0.00217587		0.00225633		0.00282971		0.00245644		0.00265083		0.00254879		0.00225734		0.0115546		0.0117267		0.00884285		0.00225911		0.00238334		0.00209081
0.00237469		0.00641569		0.00222991		0.00245129		0.00600844		0.00238833		0.00238343		0.00267046		0.00200836		0.00267747		0.00287721		0.00222311		0.00690283		0.00946995		0.00621932		0.00226319		0.00261641		0.00215584
0.00240056		0.00600103		0.00224794		0.00237845		0.00588859		0.00236185		0.00258513		0.00258555		0.00224331		0.00263197		0.00295909		0.00211816		0.0100861		0.0099553		0.00644953		0.00244021		0.00258373		0.00217139
0.0026249		0.00627391		0.00219492		0.00237005		0.00581144		0.00215055		0.00241719		0.00261904		0.00225228		0.00279635		0.00298237		0.00202152		0.00814403		0.0100894		0.0063445		0.00244977		0.00233658		0.00203371
0.00279962		0.00627917		0.00230099		0.00264371		0.00570548		0.00219192		0.00234177		0.00245292		0.00214822		0.0028712		0.00303756		0.00205426		0.0124351		0.0105548		0.00732868		0.00245535		0.00235972		0.0020138
0.00256736		0.00568422		0.0022238		0.00267075		0.00664739		0.002141		0.00233388		0.00234032		0.00218206		0.00264334		0.00281558		0.00206222		0.00955851		0.0103834		0.00850409		0.00261421		0.00269564		0.00207338
0.00243592		0.00636937		0.00218907		0.00230774		0.00720525		0.00217051		0.00233542		0.00242649		0.00231628		0.0024955		0.0027401		0.00207491		0.0103765		0.00799619		0.00763723		0.00264826		0.00258577		0.00197536
0.00273318		0.00609474		0.0021649		0.00262122		0.00746962		0.00235259		0.00247114		0.00256939		0.00207538		0.00245106		0.002872		0.0020915		0.00693541		0.00780413		0.00457675		0.0023395		0.00245118		0.00223149
0.00273705		0.00596526		0.00222147		0.00244066		0.00855019		0.00238483		0.00237219		0.00263584		0.00212564		0.00263437		0.00287722		0.0023089		0.00541003		0.0106563		0.00466649		0.00237889		0.00246835		0.00203593
0.00249284		0.00609425		0.00226482		0.00247095		0.00566775		0.00238027		0.00237825		0.00260379		0.00226273		0.00234392		0.00286829		0.00228469		0.00931175		0.0103883		0.0125318		0.00256368		0.00248804		0.00210197
0.00266211		0.0067883		0.00206731		0.00284202		0.0058667		0.0021083		0.00236521		0.00260176		0.00226138		0.00233918		0.00318269		0.00211695		0.00469907		0.0116796		0.0126264		0.00262687		0.00239422		0.0021258
0.0026763		0.00568412		0.00209006		0.00280624		0.00696797		0.00215573		0.0023902		0.00243918		0.00220785		0.00270856		0.00312779		0.00220968		0.00710869		0.0118427		0.00950882		0.00231054		0.00253613		0.00214881
0.0026877		0.00721352		0.0022622		0.00229511		0.00658163		0.00214318		0.00231102		0.00229267		0.00218186		0.00302821		0.00303354		0.00218738		0.00696309		0.0143759		0.0100299		0.00234486		0.00250759		0.00200077
0.00272179		0.00919396		0.00221414		0.00226567		0.00589872		0.00231195		0.00231389		0.00228312		0.00215579		0.00315396		0.00299831		0.00219681		0.0103125		0.0131405		0.00989782		0.00232465		0.00258299		0.00188864
0.0026297		0.00608165		0.00220322		0.00265497		0.00530607		0.00230394		0.00235285		0.00236597		0.0021552		0.00311269		0.00275125		0.00224008		0.0117751		0.00564894		0.00632874		0.0023549		0.00238962		0.00203092
0.00252227		0.00665256		0.00224136		0.00264418		0.00551046		0.00207523		0.00241232		0.00254132		0.00204188		0.00293301		0.00244782		0.00231178		0.00989658		0.00837461		0.00923279		0.00236223		0.00232261		0.00203477
0.00265485		0.00600933		0.00203442		0.00236364		0.00819328		0.00205778		0.00247185		0.00250398		0.00204572		0.00235414		0.00271644		0.00207662		0.00872422		0.00958554		0.0102234		0.00241068		0.00229491		0.00196742
0.00281191		0.00603476		0.00206578		0.00249381		0.00649307		0.00238897		0.00247333		0.00254867		0.00203843		0.00250702		0.00276865		0.00211229		0.00899795		0.00914965		0.0104542		0.00243706		0.00230553		0.0022133
0.00275355		0.00523172		0.00232665		0.0024778		0.00866757		0.00236222		0.00247962		0.00274174		0.00201714		0.0025864		0.0028271		0.00200198		0.00830249		0.0115396		0.0109087		0.00226837		0.00232211		0.00222805
0.00300373		0.00567164		0.00216416		0.00239641		0.00874545		0.00248133		0.00249788		0.00278392		0.00201161		0.00299647		0.0028206		0.0024489		0.00815273		0.0111533		0.00851806		0.00230231		0.0025183		0.00192581
0.00313475		0.00668413		0.00221751		0.00226106		0.00741997		0.00215226		0.00226251		0.00233909		0.00216246		0.00244286		0.00255752		0.00241578		0.00898634		0.00600823		0.00575578		0.00230198		0.00248148		0.00202171
0.00282645		0.00688434		0.00207799		0.00240717		0.00637867		0.002274		0.00225837		0.00234591		0.00217587		0.00320248		0.00294936		0.00211078		0.00867351		0.0092278		0.00601938		0.00229691		0.00234749		0.00207401
0.00269982		0.00768696		0.00228696		0.00239728		0.00645529		0.00204889		0.00229014		0.00234149		0.002084		0.00270946		0.00306012		0.00208231		0.00997431		0.00864387		0.0104079		0.00226827		0.00231114		0.00206299
0.00256445		0.00603975		0.00201012		0.00248861		0.00626629		0.00211471		0.00227377		0.00228287		0.00205887		0.00253284		0.00297612		0.00202165		0.00883889		0.00845589		0.0105478		0.00227082		0.00251205		0.0023914
0.00256014		0.00611937		0.00210208		0.00256324		0.00708552		0.00237368		0.00239162		0.00260698		0.00213013		0.00257484		0.00300638		0.00199771		0.0125507		0.00768296		0.00604965		0.00239739		0.00246161		0.00233292
0.00303263		0.00680033		0.0022704		0.00246353		0.00608861		0.00236163		0.00240735		0.00262389		0.00217926		0.00276054		0.00304829		0.00206031		0.0097867		0.00776544		0.00912405		0.00238105		0.00243268		0.00201295
0.00314628		0.00663074		0.00208193		0.0023416		0.00641289		0.00216269		0.00245047		0.00265632		0.00219653		0.00265433		0.00299564		0.00209663		0.0115985		0.00711195		0.0089496		0.00232946		0.00214821		0.00236596
0.00282352		0.0061277		0.00207873		0.00243102		0.00736284		0.00216832		0.00267675		0.00257436		0.00220591		0.00278691		0.00289759		0.00209379		0.0117628		0.00861461		0.00560698		0.00229702		0.00228998		0.00211009
0.00277284		0.00665209		0.00206202		0.00248879		0.00695597		0.00219933		0.00247905		0.00228747		0.00201101		0.00277506		0.00277654		0.00231605		0.011386		0.00796956		0.010934		0.00221344		0.00247761		0.0020584
0.00267367		0.00663637		0.00211704		0.00261007		0.00869649		0.00236171		0.00248634		0.00278005		0.00200158		0.00264159		0.00269518		0.00217837		0.00817403		0.0112467		0.0107591		0.00222872		0.00251326		0.00203384
0.00258399		0.00602329		0.00214204		0.00266862		0.006374		0.00229673		0.00256444		0.002702		0.0021433		0.00229623		0.0026593		0.00216538		0.00850293		0.00998067		0.0103362		0.00240455		0.00234878		0.00205478
0.00252157		0.00623412		0.002037		0.00273356		0.00628539		0.00216893		0.00245262		0.00246764		0.00253471		0.00240568		0.00251058		0.00212785		0.00844434		0.00859458		0.0106565		0.00240395		0.0021968		0.00208313
0.00282183		0.00684623		0.00204487		0.00280775		0.00552589		0.00219976		0.00245613		0.00278492		0.00259809		0.00258637		0.00257466		0.00223145		0.00868451		0.00577185		0.0103729		0.00239753		0.00218011		0.00200125
0.00284001		0.00629905		0.00235847		0.00276463		0.00555078		0.00225565		0.00240168		0.00246913		0.00223938		0.00269999		0.00269015		0.00219458		0.00806113		0.0068975		0.010065		0.00222423		0.00240914		0.00201882
0.00284202		0.00663676		0.00229838		0.00272307		0.00661919		0.00213815		0.00237619		0.00232246		0.00231488		0.00278425		0.0025843		0.00216789		0.0106456		0.00718318		0.0124148		0.00223108		0.0023405		0.00209822
0.00280551		0.0053934		0.00226212		0.00247787		0.0057046		0.00208413		0.00248264		0.00239901		0.00228805		0.00240623		0.00266015		0.00224278		0.0100516		0.00727607		0.0113961		0.00258515		0.00227114		0.00209791
0.00275531		0.00608187		0.00223821		0.00278038		0.00551234		0.00213347		0.00243246		0.00275153		0.00230934		0.00244894		0.00268639		0.00210757		0.0134634		0.0094186		0.00622162		0.00263571		0.00227806		0.00212123
0.00250431		0.00608596		0.00211466		0.00251132		0.00611064		0.00218123		0.00239863		0.00232843		0.00225644		0.00251363		0.00265839		0.00235639		0.0107192		0.00843527		0.0109904		0.00224526		0.002309		0.00209051
0.00251891		0.00644937		0.00212306		0.00246206		0.00866817		0.00232608		0.0023488		0.00246165		0.00231818		0.00259506		0.00275812		0.00214989		0.0110189		0.00694229		0.0099107		0.00223883		0.00219773		0.00210011
0.00246848		0.00634427		0.00215233		0.00237619		0.00747351		0.00243256		0.0024623		0.00291037		0.00220531		0.00269812		0.00287357		0.00209093		0.00867679		0.010452		0.00760498		0.00257139		0.00223687		0.00206404
0.00247352		0.00629717		0.00208894		0.00247604		0.006771		0.00221403		0.00236694		0.00261387		0.0025422		0.00294799		0.00283237		0.00210194		0.00859017		0.010847		0.00775974		0.00237275		0.00249716		0.00199469
0.00361766		0.00610627		0.00208169		0.00247491		0.00650611		0.00219829		0.00234065		0.00220131		0.00248406		0.00256189		0.00282035		0.00212541		0.0148039		0.00904697		0.00883725		0.00236828		0.00254335		0.00209925
0.00290665		0.00604157		0.00202192		0.00232938		0.00691308		0.00229882		0.00279148		0.00243684		0.00218286		0.00269188		0.00258452		0.00202266		0.00621688		0.00957197		0.00764791		0.00231871		0.00278823		0.00189997
0.00342461		0.0070569		0.00209775		0.00240067		0.00650112		0.00221512		0.00274776		0.00269853		0.00221739		0.00263446		0.00236483		0.00205437		0.00649159		0.0061122		0.011731		0.0024161		0.00288796		0.00191808
0.00312543		0.00662848		0.0022079		0.00252095		0.00696247		0.00229071		0.00246615		0.00220454		0.00222129		0.00273584		0.00252767		0.00200681		0.00611305		0.00528894		0.0124349		0.00244945		0.00227404		0.0020113
0.002706		0.00627738		0.00220787		0.00237172		0.0069723		0.00240442		0.00238553		0.00229975		0.00223086		0.00305667		0.00248599		0.00235935		0.00603155		0.00977263		0.011311		0.00244601		0.00243246		0.00200231
0.0028153		0.00632261		0.00230886		0.00231991		0.00669994		0.00232792		0.00234504		0.00293905		0.00211065		0.00301714		0.00237341		0.00213334		0.0101237		0.00933958		0.0107721		0.00222291		0.0024299		0.00204278
0.00301752		0.00622263		0.00228341		0.00234658		0.00677445		0.00222734		0.00228751		0.00268533		0.00209051		0.00247131		0.00257145		0.00217448		0.00999107		0.0118612		0.0104551		0.00224338		0.00263208		0.00205128
0.00298485		0.00624274		0.00212301		0.00267167		0.00691688		0.00231751		0.00231369		0.00236349		0.0022271		0.0028872		0.00285525		0.00232146		0.00802011		0.0115432		0.0101242		0.00236658		0.0025962		0.00206371
0.00307799		0.00689708		0.00212653		0.00270068		0.00623857		0.00229222		0.00233252		0.00252276		0.00217533		0.00264817		0.00265239		0.00236029		0.00816747		0.00744608		0.00919557		0.00238955		0.00221062		0.00205447
0.00265458		0.00589903		0.00229872		0.00235981		0.00691882		0.00240982		0.00236466		0.002546		0.00245113		0.00271234		0.00260803		0.00232597		0.00660957		0.00701562		0.0120507		0.00235304		0.0023819		0.00210362
0.00293494		0.00641626		0.00202852		0.00249431		0.00628218		0.00211523		0.00237674		0.00239087		0.00240953		0.00260596		0.00269449		0.00237863		0.00663719		0.00556876		0.011659		0.00229889		0.00238049		0.00220267
0.00299497		0.00504233		0.00202266		0.00244759		0.00635475		0.00212452		0.00234598		0.0023276		0.00247948		0.00266065		0.0025286		0.00236035		0.00661343		0.0118619		0.00637775		0.00230972		0.00237705		0.002219
0.00308522		0.00692862		0.00238949		0.00240713		0.00622475		0.00244224		0.00230329		0.00262903		0.00254462		0.00261421		0.00252025		0.00209391		0.00720077		0.00865236		0.00658559		0.00237079		0.00276465		0.0022304
0.00308228		0.0061386		0.00247798		0.00257612		0.00584848		0.00246665		0.00228122		0.00269145		0.00217995		0.00281394		0.00278385		0.00205634		0.0105952		0.00849922		0.0059957		0.00239421		0.00251781		0.00221473
0.00294093		0.00696922		0.00210037		0.00244889		0.00604074		0.00212866		0.00238844		0.00290915		0.00222242		0.0028042		0.00285287		0.002159		0.0101645		0.0113544		0.00618159		0.00237645		0.00255556		0.00187454
0.00309653		0.00749235		0.00223785		0.0024596		0.00657696		0.00230267		0.00240826		0.0028813		0.00220286		0.0026128		0.00232285		0.00210301		0.0108199		0.00710285		0.00669998		0.00233262		0.00252503		0.00230408
0.00319001		0.00677689		0.00224017		0.00248652		0.00661005		0.00218744		0.00259365		0.00232742		0.0022093		0.00269077		0.00300181		0.00235834		0.0103835		0.0157262		0.0114013		0.00233918		0.0023983		0.00195697
0.00321253		0.00698856		0.00229325		0.00285334		0.011347		0.00223252		0.00257892		0.0024776		0.0025234		0.00297673		0.00304837		0.00217077		0.0073129		0.0135407		0.0114154		0.00232884		0.00238422		0.00197904
0.00312371		0.00597802		0.00223864		0.00282494		0.00646537		0.00226098		0.00241017		0.00248826		0.00245627		0.00294436		0.0028191		0.00200928		0.0073354		0.0141744		0.00982328		0.00231382		0.0024341		0.00219261
0.00257442		0.00586798		0.00225649		0.00271947		0.00582606		0.00238258		0.002262		0.00270423		0.0021945		0.00277919		0.00289403		0.00206202		0.00826555		0.0148107		0.0104387		0.00295887		0.00236592		0.00214071
0.00257254		0.0060247		0.00224165		0.00228618		0.00679915		0.00210363		0.00243918		0.0025068		0.00224785		0.00279264		0.00294053		0.00199983		0.0113671		0.0163715		0.0108177		0.00233523		0.00244668		0.00190507
0.00308004		0.00601315		0.00214238		0.0025497		0.0108227		0.0021524		0.00242124		0.00241979		0.00226444		0.00311821		0.00254178		0.0021685		0.0110501		0.00571137		0.00667355		0.00238186		0.00244941		0.00202806
0.00300213		0.00678672		0.00245062		0.00260007		0.00787188		0.00215164		0.00245555		0.00250495		0.00239137		0.00298883		0.00247724		0.00234774		0.0070478		0.00839303		0.00623986		0.00254131		0.00242322		0.00203264
0.00310716		0.00587106		0.00243265		0.00254175		0.00609594		0.00218598		0.00245366		0.00243587		0.0022503		0.00268414		0.00244065		0.00226105		0.0120192		0.0087276		0.00497329		0.00233176		0.00251077		0.00207409
0.0026057		0.00605457		0.0022655		0.00235915		0.00601578		0.00211345		0.00239141		0.00261143		0.00233587		0.0025903		0.0026032		0.00225915		0.0083467		0.00904264		0.012023		0.00232305		0.00256462		0.00202184
0.0029808		0.00576353		0.0023276		0.00232661		0.00582871		0.00215397		0.00238684		0.00271115		0.00236264		0.00264011		0.00259249		0.00236159		0.0105843		0.00610158		0.0116766		0.00223279		0.00265283		0.00201989
0.00299878		0.00645018		0.00205989		0.00265518		0.00882079		0.00235959		0.00253892		0.00251951		0.0024964		0.00279466		0.00256346		0.00214714		0.00843424		0.00607545		0.00812952		0.00233417		0.00223927		0.00202846
0.00264772		0.00609667		0.00202649		0.00262554		0.0065805		0.00243452		0.00250238		0.0025537		0.00233598		0.00260073		0.00286367		0.00228646		0.011419		0.0108102		0.00709305		0.00241535		0.00221028		0.00203084
0.00268323		0.00588592		0.00203964		0.00271157		0.00879177		0.00242579		0.00263601		0.00252184		0.00215602		0.00268478		0.00286993		0.00231563		0.00852134		0.00987185		0.00691957		0.00243859		0.00251983		0.00198865
0.00347046		0.00577821		0.00201522		0.00257315		0.00968904		0.00238655		0.00249929		0.00238634		0.00217964		0.00247104		0.00247624		0.00205107		0.0109079		0.00946194		0.0125226		0.0022485		0.00255361		0.00209779
0.00369465		0.0054299		0.00199358		0.00249888		0.00765766		0.0021142		0.00250359		0.00240327		0.00243585		0.0032766		0.00264571		0.00201755		0.0087734		0.0096364		0.0132707		0.00224315		0.00242977		0.00208555
0.00374611		0.00654734		0.00216635		0.00245356		0.00611559		0.00212922		0.00242793		0.00247328		0.00258888		0.00327397		0.00266972		0.00224617		0.00803627		0.0111441		0.0100676		0.00221307		0.00242696		0.00204838
0.00361989		0.00621533		0.00219283		0.00242915		0.0063444		0.00214847		0.00222284		0.00257916		0.00234354		0.00289141		0.00263929		0.00225988		0.00824268		0.011482		0.00988253		0.00226676		0.0024729		0.00218252
0.0032354		0.00568644		0.00228661		0.00248384		0.0073205		0.00213911		0.00219941		0.00266421		0.00232473		0.00260537		0.00264779		0.00209632		0.00785856		0.0107095		0.00591241		0.002412		0.00249924		0.00212934
0.00339242		0.00611358		0.00222706		0.00251216		0.00603457		0.00223719		0.00233305		0.00235122		0.00223318		0.0024752		0.0025721		0.00213288		0.00880102		0.0103179		0.0075886		0.00232227		0.0024167		0.00216866
0.00278699		0.00558534		0.00204237		0.00245297		0.00600861		0.0021976		0.00236356		0.00230839		0.00224255		0.00237501		0.00253685		0.00216769		0.00934645		0.00652405		0.00788838		0.00231209		0.00233046		0.00207244
0.00292052		0.004913		0.00210157		0.00234707		0.00613858		0.00234499		0.00227445		0.00238166		0.00258933		0.00259768		0.00271244		0.00210245		0.0120098		0.0120005		0.00803393		0.002349		0.00228091		0.00204801
0.00292989		0.00547043		0.00229751		0.00251726		0.005718		0.00238851		0.00231484		0.00236299		0.00225298		0.00278299		0.00237966		0.00244109		0.00716692		0.0101164		0.00789506		0.00235731		0.00246798		0.00209042
0.00367466		0.0064599		0.00228163		0.00230256		0.00615152		0.00228253		0.00230591		0.00216926		0.00236948		0.00281052		0.00247523		0.00216105		0.00882531		0.0110994		0.0062895		0.00247114		0.00237268		0.00207052
0.00346555		0.00651529		0.00221966		0.00230665		0.00586196		0.00231252		0.00246766		0.0023358		0.00228813		0.00293978		0.00269528		0.00228102		0.00841365		0.0119324		0.005736		0.00247698		0.00233213		0.00193681
0.00301171		0.00582231		0.00217042		0.00243757		0.0051957		0.00238848		0.00248374		0.00233613		0.00226208		0.00302234		0.0023395		0.00228395		0.00827266		0.0133568		0.0097928		0.00236269		0.00238848		0.0020376
0.00283938		0.00548664		0.00198904		0.00253912		0.00591721		0.00236335		0.00242712		0.00242287		0.00219451		0.00250022		0.00253022		0.0022288		0.00884263		0.012137		0.00926435		0.00221426		0.00233967		0.00199256
0.00277391		0.00608952		0.00199319		0.00252881		0.00638203		0.00242059		0.00248433		0.00238987		0.00216561		0.00252073		0.00256424		0.002228		0.00873727		0.00784544		0.00700426		0.00221195		0.00252849		0.00198408
0.0035445		0.00544693		0.00248573		0.00239693		0.00609011		0.00209888		0.00243545		0.0024904		0.00265222		0.00275746		0.00259187		0.00218357		0.0119146		0.0138079		0.00722175		0.00241471		0.00253869		0.001977
0.00310715		0.00585968		0.00247342		0.00241737		0.00574024		0.00209097		0.00245528		0.00250502		0.00219105		0.00263212		0.00244083		0.00228476		0.0115982		0.0142026		0.0083617		0.00242466		0.00246062		0.00199602
0.00286862		0.00738421		0.00241232		0.00225051		0.00565064		0.00220172		0.00243216		0.00247394		0.00217357		0.00252673		0.00282509		0.00211103		0.0104837		0.0120968		0.00821535		0.00249422		0.00248066		0.00198074
0.00284634		0.00695973		0.00211089		0.0023344		0.00950011		0.0022372		0.00236383		0.00247577		0.00251953		0.00242617		0.00290088		0.00209851		0.0115061		0.0120303		0.00982947		0.00246274		0.00262395		0.00216299
0.00256417		0.00572587		0.00211586		0.00243379		0.00604872		0.00214242		0.00225122		0.00243347		0.0022985		0.00291355		0.00269027		0.00225129		0.00770619		0.00830145		0.00915989		0.002258		0.00243981		0.00213211
0.00342949		0.00585772		0.00214586		0.00240333		0.00723919		0.00215116		0.00231055		0.00277757		0.00217612		0.00295165		0.00272934		0.00207457		0.00839133		0.00984959		0.00849827		0.00241597		0.00243396		0.00211476
0.0029259		0.00597817		0.00218719		0.002485		0.00794245		0.00223872		0.00233196		0.00266867		0.0021333		0.0026241		0.00245004		0.00215174		0.0105313		0.00999792		0.0133626		0.00241833		0.00237116		0.00225082
0.00251462		0.0058098		0.0024875		0.00246442		0.00713171		0.00223248		0.00224849		0.0023736		0.0021008		0.00239083		0.00234866		0.00230098		0.00520365		0.0088364		0.0125385		0.00246776		0.0023373		0.00228578
0.00243075		0.00588845		0.00245856		0.00245431		0.0074364		0.0023498		0.00231652		0.00243097		0.00209106		0.00242168		0.00254798		0.00229399		0.0123387		0.00808432		0.0133181		0.00244926		0.002323		0.00198285
0.00249073		0.00615046		0.00223728		0.00247283		0.00624966		0.0023502		0.00248889		0.00252336		0.00227769		0.00234053		0.0029037		0.00229122		0.0126047		0.0104721		0.00914384		0.00229483		0.00245833		0.0020448
0.00244455		0.00628456		0.00224449		0.00244503		0.00550325		0.00223035		0.00242021		0.00237268		0.00215162		0.00231533		0.00275303		0.00226749		0.00658406		0.00948083		0.00899036		0.00246108		0.00257946		0.00209708
0.00265656		0.00587773		0.00213972		0.00278181		0.00610711		0.00232702		0.0023982		0.00234189		0.00209684		0.00295699		0.00235082		0.00204011		0.0086208		0.0106507		0.00705351		0.0024677		0.00252174		0.00192682
0.00263581		0.00571801		0.00213372		0.00277267		0.00808102		0.0022987		0.00242907		0.00284384		0.00211173		0.00301844		0.00242076		0.00223725		0.0131693		0.0108256		0.00745822		0.00236416		0.00239981		0.00213102
0.00275879		0.00566136		0.0021485		0.00254579		0.00650598		0.00217128		0.00239205		0.00246938		0.00213241		0.00270463		0.00247709		0.00218445		0.0116065		0.0106959		0.0108839		0.00244509		0.00245416		0.00209096
0.00275514		0.00615804		0.00205952		0.00245856		0.00666534		0.00231484		0.00254556		0.00243225		0.00225501		0.00253204		0.00290052		0.00212489		0.0134319		0.0112824		0.00627071		0.00226324		0.00243839		0.00195953
0.00287979		0.00685004		0.00214129		0.00244688		0.00646997		0.00226963		0.00245928		0.00253679		0.00224		0.00250888		0.00284963		0.00214746		0.0115144		0.011402		0.00601237		0.0022899		0.00249507		0.00195782
0.0029549		0.00639367		0.00227368		0.00434345		0.00603008		0.00211513		0.00250643		0.00248814		0.00225319		0.00288313		0.00316359		0.00208235		0.0101168		0.0119451		0.00819239		0.00239018		0.00244867		0.00207775
0.00301428		0.00668722		0.00223889		0.00257499		0.00624124		0.00240946		0.00255441		0.0026474		0.00226264		0.002581		0.00301037		0.00203677		0.00968136		0.0121152		0.00802483		0.00223798		0.00238845		0.00205493
0.00299336		0.00667685		0.00233571		0.00267521		0.00610447		0.00254996		0.00247824		0.00267369		0.00225355		0.00250289		0.00232902		0.00200565		0.0086966		0.0123857		0.00903088		0.00255389		0.00254114		0.0021116
0.00263504		0.00666007		0.00240719		0.00265375		0.00959678		0.0022746		0.00225077		0.00233566		0.00228617		0.00300558		0.00235016		0.00227641		0.00888704		0.0127876		0.00899942		0.00261482		0.0025053		0.00195985
0.00299436		0.00591644		0.0022982		0.00299065		0.00627159		0.00229009		0.00241346		0.00232102		0.00233669		0.00285274		0.00247759		0.00232547		0.00749099		0.0079722		0.00897748		0.002365		0.00248627		0.00204372
0.00292737		0.00618636		0.00232189		0.00246536		0.0118168		0.00218809		0.00250897		0.00230116		0.00237183		0.00273742		0.00269687		0.00226097		0.00758281		0.00809432		0.00904673		0.00250362		0.00249688		0.00204058
0.00303353		0.00683536		0.00207606		0.00229301		0.00594267		0.00206339		0.00251937		0.00225126		0.00239451		0.00271244		0.00282588		0.00198548		0.0108894		0.00863603		0.00714959		0.0024821		0.00235753		0.00200827
0.00292844		0.00589343		0.00209884		0.00246008		0.00766977		0.00225137		0.00242104		0.00237066		0.00239171		0.00267706		0.00290182		0.00217728		0.0107519		0.0080642		0.00658424		0.00242014		0.00238219		0.00204464
0.0031419		0.00638088		0.00214679		0.00240248		0.0100199		0.00235012		0.00238738		0.00253364		0.00240774		0.00276458		0.00275109		0.00216236		0.0112208		0.0117902		0.00650669		0.00241726		0.00236446		0.00210453
0.00317051		0.00682968		0.00213167		0.00243085		0.00766423		0.00223324		0.00233791		0.00248231		0.00222513		0.00274174		0.00277637		0.00219777		0.0129306		0.0116973		0.00716907		0.00229347		0.00237683		0.00223431
0.00300459		0.00557883		0.00209149		0.0023801		0.00616275		0.00235358		0.00238606		0.00247178		0.00225361		0.00257953		0.00284077		0.00211415		0.0116474		0.0104477		0.00561033		0.00233388		0.00242449		0.00215704
0.00269145		0.00650277		0.00214362		0.00242277		0.00833733		0.0022433		0.0023827		0.0024409		0.0022356		0.00264889		0.00268535		0.00215769		0.011718		0.0106871		0.00558236		0.00228784		0.00250794		0.00218481
0.0026561		0.00651771		0.00218132		0.00268588		0.00527632		0.00208088		0.00238744		0.00249398		0.00223178		0.00262744		0.00277878		0.00211618		0.0118747		0.010704		0.00814596		0.00226136		0.00224088		0.00205321
0.00260094		0.00621069		0.00213331		0.00270858		0.00609439		0.00232952		0.00235781		0.00249839		0.00205344		0.00273901		0.00277197		0.0021709		0.0120116		0.00983189		0.00806478		0.00230372		0.00244023		0.00210282
0.00288609		0.00682536		0.002432		0.00251352		0.00672344		0.0021395		0.00233582		0.00251337		0.00206515		0.00276744		0.00305261		0.0020264		0.0122865		0.00890527		0.00508963		0.00231321		0.00243338		0.00203832
0.00268003		0.00646019		0.00217126		0.00256117		0.00606075		0.00219221		0.00233793		0.00259485		0.00229637		0.00279411		0.0026938		0.00236556		0.0103559		0.00743157		0.00711651		0.00280318		0.00244972		0.00210864
0.00324482		0.00620471		0.00213687		0.00241533		0.006478		0.00234067		0.00229393		0.00234231		0.00236173		0.0025604		0.00276062		0.0024981		0.00989236		0.00722919		0.0112409		0.00230647		0.00232337		0.0020714
0.00326515		0.00582618		0.00211793		0.00234487		0.00607618		0.00210446		0.00231783		0.00307926		0.00225539		0.00240296		0.00273124		0.00240397		0.0102645		0.00854271		0.0109253		0.00233915		0.00236029		0.00190926
0.00281153		0.00697917		0.00238752		0.00232811		0.00839953		0.00236951		0.00230089		0.00298187		0.00210163		0.00278505		0.00267044		0.00226081		0.00922813		0.0048215		0.00918726		0.00230087		0.00229422		0.00191656
0.00307022		0.00729663		0.00264317		0.00311832		0.00724239		0.00246915		0.0023761		0.002611		0.00228359		0.00253213		0.0026301		0.00234642		0.010889		0.00955557		0.00948641		0.00228479		0.00227139		0.00214187
0.00243739		0.00553637		0.00224492		0.00278359		0.00647489		0.00264472		0.00233519		0.0023505		0.00230169		0.00239603		0.00263744		0.0022692		0.0111053		0.0115725		0.0117452		0.00224039		0.0023457		0.00201543
0.00257695		0.00603572		0.00238762		0.0026962		0.00929724		0.00252085		0.00225864		0.00236493		0.00217987		0.00266838		0.00314686		0.00199229		0.0113747		0.00815862		0.0133042		0.00256731		0.00235698		0.00210318
0.00286547		0.00546697		0.00219945		0.00273541		0.00622249		0.00232781		0.00229161		0.00284508		0.00230247		0.00259498		0.00304918		0.00203282		0.00929472		0.0138364		0.010378		0.00227667		0.00236651		0.00234513
0.00280085		0.00644738		0.00231891		0.00273253		0.00727832		0.00224075		0.00238297		0.00279958		0.00208561		0.00259935		0.0029429		0.0022526		0.0097795		0.00811402		0.0102449		0.0023385		0.00245404		0.0023068
0.00286291		0.00610421		0.00202465		0.00265322		0.0066656		0.00223208		0.00238256		0.00261192		0.00206242		0.00230052		0.00282095		0.00220704		0.0110232		0.014324		0.00827881		0.00229812		0.00244048		0.00242485
0.00256378		0.0099739		0.00208273		0.00251106		0.00678636		0.00223891		0.00230529		0.00288901		0.00211641		0.00237429		0.00281165		0.00239875		0.0104931		0.0139458		0.0112639		0.00244414		0.00233181		0.00226742
0.00320548		0.00572406		0.00237259		0.00314495		0.00809437		0.00222409		0.00290078		0.00285056		0.00215378		0.00268427		0.00293868		0.00232843		0.0119243		0.0101704		0.0108359		0.00246144		0.00225647		0.00201886
0.00265883		0.0055724		0.00237496		0.00280307		0.0091196		0.00215328		0.00249639		0.00246852		0.002134		0.00269429		0.00279466		0.00213755		0.0117769		0.0102245		0.0116009		0.00242491		0.00254819		0.00201614
0.00280954		0.00647072		0.00223531		0.00254357		0.00982007		0.00216388		0.00251332		0.00255011		0.00257409		0.00276566		0.00308404		0.00212563		0.0126657		0.0118497		0.011604		0.00253382		0.00241755		0.00200961
0.00330791		0.00617274		0.00229917		0.00263314		0.00615007		0.00225692		0.00234324		0.00235801		0.00254849		0.00270708		0.00296407		0.00213502		0.0117013		0.0158218		0.00978709		0.00239541		0.00240307		0.001968
0.00301604		0.00579921		0.0022423		0.00267941		0.00700612		0.00216051		0.0023962		0.00227347		0.00229425		0.0024729		0.0026746		0.00206782		0.0103041		0.0129384		0.0112056		0.00225792		0.00249125		0.00213016
0.00321948		0.00642116		0.00223707		0.00234237		0.0086711		0.00209855		0.00262114		0.00261417		0.00232237		0.00251569		0.00256687		0.00206487		0.00828485		0.0131848		0.0109382		0.00226016		0.00224787		0.00211858
0.00288708		0.00681911		0.00244269		0.00249215		0.00695525		0.00221088		0.00271339		0.00261373		0.00232552		0.00252841		0.00290861		0.00210309		0.00702867		0.00897986		0.00788441		0.00229426		0.00240994		0.00194743
0.00295336		0.0069232		0.00227007		0.00244756		0.00860563		0.00237822		0.00236569		0.00263929		0.00232495		0.00245242		0.00296084		0.00213367		0.00709107		0.0161193		0.00912193		0.00230381		0.00245552		0.00202997
0.00309608		0.00672418		0.00229978		0.00239425		0.00900585		0.00251291		0.00239202		0.00235346		0.00225874		0.00244978		0.0029047		0.00221178		0.00790525		0.0126109		0.00481696		0.00243545		0.00253169		0.00211474
0.0032976		0.00686832		0.00232879		0.00238028		0.00599898		0.00241153		0.0022866		0.00252064		0.0022787		0.00293461		0.00294646		0.00207416		0.00769222		0.0161936		0.00676598		0.0024893		0.00248183		0.00204239
0.00353923		0.00679546		0.00235217		0.00280292		0.00690366		0.00230514		0.0025265		0.00247629		0.00228501		0.0028756		0.0026955		0.00210881		0.0110934		0.0122402		0.00982202		0.00229517		0.00234441		0.00207178
0.00397605		0.00698685		0.00208		0.00248181		0.00666804		0.0024939		0.00262053		0.00250075		0.00216589		0.00242995		0.00276255		0.00212802		0.0123689		0.016247		0.0098117		0.0023169		0.00233603		0.00212783
0.00319671		0.00680365		0.00210091		0.00232064		0.00621047		0.00245867		0.00255918		0.00261238		0.00219365		0.00232232		0.00284081		0.00207573		0.012659		0.0147759		0.00888304		0.00241393		0.00230415		0.00218055
0.00281831		0.00770183		0.00231565		0.00257868		0.00716384		0.0025008		0.00253126		0.00252574		0.00227804		0.0023821		0.00243685		0.00225859		0.0110435		0.00808906		0.00865288		0.00237708		0.00232807		0.00215148
0.00290278		0.00719955		0.00226185		0.00223137		0.00700739		0.00215323		0.00254974		0.0024959		0.00232196		0.00242602		0.0025722		0.00215391		0.00970124		0.00836829		0.00976465		0.00276326		0.00228		0.00231247
0.00286683		0.00617187		0.00228518		0.00236663		0.00619876		0.00234928		0.00227876		0.0026137		0.00245206		0.00308596		0.00259656		0.00225872		0.00990739		0.00947209		0.0106716		0.00262085		0.00228504		0.00221839
0.00347168		0.0059635		0.00219686		0.00259281		0.00612314		0.00227231		0.00233344		0.00253724		0.00235184		0.00256675		0.00264735		0.00224739		0.0105001		0.0102426		0.0112082		0.00268595		0.00223465		0.00215987
0.00349117		0.00581466		0.00221188		0.00263339		0.00641534		0.00239152		0.00248051		0.0023912		0.0022151		0.0026062		0.00272826		0.00223809		0.00871815		0.00885983		0.00729091		0.00218547		0.00223256		0.00199808
0.00324998		0.00560841		0.00237675		0.00225664		0.00653645		0.00219927		0.00231847		0.00274976		0.00227444		0.00247983		0.0026868		0.00209169		0.00866458		0.00944728		0.0099793		0.00226956		0.0023798		0.00202326
0.00331054		0.00620799		0.00234138		0.00226613		0.00689442		0.00255017		0.00231155		0.00270567		0.00219259		0.00266412		0.00252227		0.00226866		0.0102858		0.0107036		0.00995248		0.00230282		0.00237195		0.0021633
0.00343878		0.00618225		0.00216915		0.00234343		0.00759068		0.00210199		0.00230997		0.00239168		0.0022522		0.0024281		0.00247207		0.00223946		0.00984116		0.0128072		0.0117725		0.00235616		0.00233107		0.00214666
0.00344456		0.00667124		0.00223775		0.00232728		0.00817279		0.00207378		0.00230946		0.00270351		0.00230355		0.00229947		0.00259711		0.00227008		0.0101073		0.00726896		0.0116393		0.00250738		0.00227274		0.00231816
0.00300163		0.00722474		0.00221812		0.00252252		0.00608141		0.00200961		0.00233141		0.00275477		0.00227172		0.0030121		0.00291238		0.00213353		0.0108448		0.0102547		0.00693189		0.00241805		0.0022932		0.0022737
0.00289265		0.00741848		0.00231764		0.00230304		0.00624934		0.0022888		0.00231096		0.00270213		0.00215838		0.00279811		0.00280135		0.00208038		0.0111447		0.00670375		0.0066554		0.00230613		0.00260962		0.00218601
0.003039		0.00662075		0.00227233		0.00262606		0.0075327		0.00228543		0.00238206		0.0026356		0.00240507		0.00288346		0.00279287		0.00202536		0.0103754		0.0127174		0.00776664		0.00227457		0.00261011		0.00220845
0.00280482		0.00654245		0.00209364		0.00231311		0.00618563		0.00239908		0.00235214		0.00235804		0.00239529		0.0025005		0.00293746		0.00198921		0.00664986		0.0100336		0.00756317		0.00253648		0.00268005		0.00209166
0.00288629		0.0060606		0.00226986		0.00246626		0.00696723		0.0023938		0.00221733		0.00229045		0.00217108		0.00262739		0.00270918		0.00201515		0.00793483		0.0107056		0.0123185		0.00230955		0.00256223		0.00207575
0.00271731		0.00715536		0.00209203		0.00280892		0.00578331		0.00243447		0.0023661		0.0023603		0.00215803		0.00342261		0.00261319		0.0022604		0.0132321		0.0155054		0.00921862		0.00234981		0.00232615		0.00246562
0.00301668		0.00826271		0.00211459		0.00273932		0.00596704		0.00223534		0.00240954		0.00242197		0.00227387		0.00330798		0.00269067		0.00228419		0.0131439		0.0160383		0.0114905		0.00243099		0.00236286		0.00252586
0.00306068		0.00679601		0.00204184		0.00242285		0.00562107		0.0022128		0.00278339		0.00271565		0.00225206		0.00256337		0.00261934		0.0020424		0.00862187		0.00968816		0.00900126		0.00242816		0.00235314		0.00217402
0.00311677		0.00650505		0.00222393		0.00249518		0.00589402		0.00248621		0.00281499		0.00243562		0.00217519		0.00250494		0.00236578		0.00213392		0.00889491		0.00989354		0.0100633		0.00238556		0.00234992		0.00215819
0.00308739		0.00636848		0.0021978		0.0025274		0.0055587		0.00251196		0.00251169		0.00249206		0.00218168		0.00299065		0.00236072		0.00213536		0.0124461		0.0110041		0.0102016		0.00247406		0.00234474		0.00215915
0.00298298		0.00667738		0.00211529		0.00242713		0.00556485		0.0020566		0.00229405		0.00268068		0.00225194		0.00300963		0.00269926		0.00217658		0.0107506		0.00663682		0.00909362		0.00239527		0.00240825		0.00210414
0.00271251		0.00677983		0.00206137		0.00261986		0.00549862		0.00200305		0.00225865		0.00272981		0.00209515		0.00262057		0.00255663		0.00223099		0.0105036		0.00678657		0.0119971		0.00235512		0.00241874		0.00217953
0.00275021		0.00614826		0.00212927		0.00235454		0.00585445		0.00241672		0.0024138		0.00264033		0.00241856		0.00268304		0.00257888		0.0026258		0.0122166		0.0142895		0.0094458		0.00238353		0.00254579		0.0020699
0.00280554		0.00665625		0.00223736		0.00247238		0.00823398		0.0024162		0.00247052		0.00262376		0.00223816		0.00289618		0.0027496		0.00258928		0.0134206		0.0148532		0.0120062		0.00228455		0.00251423		0.00218283
0.0028149		0.00639792		0.00224119		0.00263286		0.00637969		0.00237366		0.00251079		0.00253061		0.00225082		0.00287386		0.0026811		0.00265554		0.0132147		0.0131842		0.011533		0.00226908		0.00219723		0.00214482
0.00319373		0.0078676		0.00217066		0.00246555		0.00600499		0.00247504		0.00254115		0.00275437		0.00221597		0.00275445		0.00263196		0.00224317		0.0139107		0.0131344		0.0123536		0.00229774		0.00249141		0.00203598
0.00324866		0.006743		0.00219224		0.00244611		0.00562001		0.00244536		0.00249463		0.00261897		0.00227334		0.0026519		0.00265332		0.00244015		0.0119776		0.00901369		0.0124109		0.00220747		0.00245865		0.00206086
0.00279906		0.00632027		0.00237265		0.00299414		0.00543792		0.00243496		0.00230709		0.00245187		0.00218008		0.00256916		0.00302764		0.00242288		0.0125346		0.0095667		0.0111471		0.00223248		0.00244064		0.00206237
0.00288382		0.00728124		0.00234764		0.00276505		0.00563537		0.00262396		0.00226205		0.00241737		0.00218409		0.0030124		0.00276375		0.00225585		0.00633074		0.01089		0.0108508		0.00226276		0.00245337		0.00208613
0.00285118		0.00664405		0.00220526		0.00250225		0.00566728		0.00268214		0.00235996		0.00222534		0.00253936		0.00264819		0.00297484		0.00225988		0.0109192		0.0104047		0.0113547		0.0024544		0.00239786		0.00210367
0.00274267		0.00676041		0.00206898		0.0024285		0.00713293		0.00242849		0.00238349		0.00251149		0.00254994		0.00264453		0.00293958		0.00226481		0.0133303		0.0103836		0.0109433		0.002658		0.0024229		0.00216594
0.00282615		0.00660117		0.00210942		0.00246992		0.00720469		0.00246858		0.00252376		0.00243986		0.0023167		0.00355161		0.00267554		0.00217224		0.0130525		0.0102404		0.00824881		0.00222571		0.00247469		0.00215523
0.00314244		0.00722317		0.00211295		0.00248668		0.00626689		0.00212241		0.00245792		0.00275805		0.00225545		0.00294327		0.00261134		0.00213876		0.0139974		0.0124305		0.0109872		0.00221975		0.00236437		0.00207211
0.00308385		0.00768417		0.00212131		0.00246277		0.00590815		0.00218425		0.00242428		0.0024412		0.00223977		0.00244369		0.00299822		0.00206303		0.0140227		0.0131602		0.00820507		0.00235509		0.00248843		0.00208938
0.00271454		0.00767995		0.00217607		0.00247849		0.00668585		0.00208843		0.00253328		0.002538		0.00219501		0.00303407		0.00275506		0.00227478		0.010355		0.0120848		0.0112978		0.00223896		0.00247515		0.00192291
0.00304292		0.00624428		0.00208261		0.00254986		0.00714854		0.00235863		0.0023768		0.00267234		0.00226075		0.00298051		0.00268809		0.00229186		0.0105582		0.00989631		0.0109023		0.0022595		0.00228344		0.00207806
0.00257662		0.00699361		0.00205511		0.00255568		0.00654325		0.00243826		0.00238498		0.00287106		0.00227088		0.00290164		0.00267221		0.00209396		0.0107101		0.010233		0.00805011		0.00234683		0.00220757		0.00208927
0.00272044		0.00678325		0.00217255		0.00247669		0.00627604		0.0024522		0.00237753		0.00278845		0.00219798		0.00321974		0.00241502		0.00221378		0.00828898		0.0111545		0.010026		0.00241447		0.0022364		0.00214127
0.00394045		0.00645745		0.00215821		0.00237584		0.00525239		0.0024186		0.00236689		0.00272412		0.00224562		0.00293002		0.00255365		0.00229864		0.0105964		0.0118872		0.00772272		0.00230253		0.00261102		0.00195971
0.00378227		0.00621012		0.00239677		0.00254495		0.00620466		0.00223672		0.00250518		0.00283357		0.00231028		0.00285712		0.00265308		0.00199075		0.0100623		0.00479227		0.00937716		0.00235722		0.00259551		0.0021482
0.0028079		0.00504		0.00231281		0.00249874		0.00816314		0.0023097		0.00257123		0.00284585		0.00219077		0.00295495		0.00263821		0.00218518		0.00889556		0.0107262		0.00876498		0.00231116		0.00257205		0.00218857
0.00277566		0.00506589		0.00233402		0.00266416		0.00512971		0.00250206		0.0025677		0.00295874		0.0021661		0.00292434		0.00254388		0.00234146		0.0130032		0.00970221		0.00960423		0.00244489		0.00253793		0.0022013
0.00285777		0.00611462		0.00228696		0.00258043		0.00721507		0.00242598		0.00255507		0.00279857		0.00230867		0.00302008		0.00282633		0.0022049		0.0124077		0.0138413		0.0100777		0.00219734		0.00233481		0.0022232
0.00333567		0.00631438		0.00217812		0.00252546		0.0061951		0.00239276		0.00247764		0.00274188		0.00230682		0.00304749		0.00251358		0.00209339		0.00686491		0.0149716		0.0102451		0.0023857		0.00224839		0.00216779
0.00312453		0.00663631		0.00220308		0.00241739		0.00623022		0.00235466		0.00247699		0.00270753		0.00225516		0.00317174		0.00287657		0.00208414		0.00543726		0.0115199		0.0100063		0.00247938		0.00218053		0.00214927
0.00250214		0.00609599		0.00215643		0.00248393		0.00553531		0.00237794		0.00250661		0.00262176		0.00224988		0.00317795		0.00281278		0.00210343		0.0109956		0.0114539		0.0091217		0.0024672		0.00252264		0.00194436
0.00245102		0.00568671		0.00216902		0.00246171		0.00578694		0.00278347		0.00255834		0.00255342		0.0020575		0.00315075		0.00289696		0.00197197		0.00824983		0.00978139		0.00925681		0.00218218		0.00249106		0.00207106
0.0030488		0.00618518		0.00217068		0.00265977		0.00571514		0.00267545		0.00243444		0.00253736		0.00201823		0.00326629		0.00234096		0.00211925		0.0123863		0.0106813		0.00992687		0.00235293		0.00233755		0.0020693
0.00303668		0.00638934		0.00216279		0.00303755		0.00625619		0.00223855		0.00247141		0.00239351		0.00211156		0.00277935		0.00263638		0.00216697		0.00956723		0.00664191		0.0107895		0.002373		0.00258032		0.00191704
0.00301063		0.00755719		0.00203288		0.00277317		0.00589185		0.00225593		0.00255828		0.00282573		0.00211229		0.00339386		0.00293028		0.0022235		0.0108946		0.00733201		0.00986332		0.00226934		0.002665		0.00193349
0.00296888		0.0067431		0.00204871		0.00257121		0.00586726		0.00219353		0.00268276		0.00277362		0.0020529		0.00354877		0.00247033		0.00212538		0.00943973		0.0078607		0.0113532		0.00224288		0.00232586		0.00220411
0.00340979		0.00728851		0.00241772		0.00255181		0.00681472		0.00222452		0.00232977		0.00246302		0.00211724		0.00393853		0.002644		0.00213551		0.011757		0.00748117		0.0112031		0.00236712		0.0023505		0.0021563
0.00289839		0.00693142		0.00245554		0.00253941		0.00636084		0.00219714		0.00235181		0.00251741		0.00223812		0.00367577		0.00254011		0.0021403		0.0124124		0.0158618		0.0120168		0.00237399		0.00234576		0.00205692
0.0029113		0.00606458		0.00203319		0.00217843		0.00575763		0.00221971		0.00246085		0.00255461		0.00231811		0.00241519		0.00244035		0.00220168		0.0129556		0.0138138		0.0130858		0.00224692		0.00242562		0.00213028
0.00290547		0.00632327		0.00207251		0.00212474		0.00722113		0.00222986		0.00259166		0.00263419		0.00213587		0.00241653		0.00286204		0.00214051		0.0108138		0.00821339		0.0112126		0.00224925		0.00240311		0.00196022
0.00356821		0.00749681		0.00211618		0.00232574		0.00706032		0.00211595		0.0024959		0.00249148		0.00207947		0.00260419		0.0024783		0.00199897		0.0119962		0.00775559		0.0109254		0.00223675		0.0022669		0.00194273
0.00327376		0.00640693		0.00232144		0.00234419		0.00698687		0.00209466		0.00253702		0.00269586		0.00216679		0.00267351		0.00265905		0.00200979		0.0104657		0.0115748		0.00904935		0.00228508		0.00231517		0.0019483
0.00336425		0.00689232		0.00233793		0.00230436		0.0070446		0.00226394		0.00241181		0.0027113		0.00216719		0.00265628		0.00258021		0.00218565		0.011603		0.011878		0.0092769		0.00238701		0.00238682		0.00198403
0.0032749		0.00654449		0.00225835		0.0025283		0.00771102		0.00230306		0.00248736		0.00248135		0.00220938		0.00261068		0.00267794		0.00219916		0.00793064		0.00975661		0.0100378		0.0023556		0.00230378		0.00200587
0.00284885		0.00730831		0.00228686		0.00245859		0.00694956		0.00216396		0.00254371		0.0025696		0.00222226		0.00308028		0.00264229		0.0020518		0.00689907		0.00994145		0.00938608		0.00254445		0.00237436		0.00216876
0.00272651		0.00638016		0.00223148		0.00262517		0.00637201		0.00216867		0.00239486		0.0025118		0.00225008		0.00266807		0.00296556		0.00224949		0.00860171		0.00640278		0.00636533		0.00250368		0.00248551		0.00205051
0.00297214		0.007346		0.00219924		0.00277453		0.0063007		0.00220976		0.00231634		0.00255053		0.00221781		0.00281482		0.00293625		0.00205948		0.00982248		0.0101171		0.0112846		0.00231788		0.00232556		0.00206226
0.0030034		0.00705737		0.00233631		0.00240471		0.00609111		0.00242245		0.00230452		0.002615		0.0024151		0.00306676		0.00259005		0.00201183		0.0100738		0.0105082		0.0106572		0.00230099		0.00234108		0.00196917
0.00319067		0.0065123		0.00232296		0.00251386		0.00644274		0.00238317		0.00253059		0.00255267		0.00224074		0.00283556		0.00273651		0.00215755		0.0103099		0.0128159		0.0088157		0.00235148		0.00229971		0.00217469
0.00281386		0.00680706		0.00231679		0.00251433		0.00684345		0.00253902		0.00252388		0.00253554		0.00214989		0.00237648		0.00275977		0.0021376		0.0097849		0.0133887		0.00802332		0.00244052		0.0023407		0.00204183
0.00268319		0.00550172		0.00224851		0.00244914		0.00690166		0.00261772		0.00244462		0.00241158		0.0020237		0.00258483		0.00287057		0.00211355		0.00979547		0.0134263		0.00734639		0.00238565		0.00234711		0.00206854
0.00343768		0.00673017		0.00214971		0.00256049		0.00721965		0.0025186		0.0024546		0.00261107		0.00202613		0.00293236		0.00276166		0.00224289		0.0122152		0.0139843		0.0101272		0.00237765		0.00238221		0.00201559
0.00285288		0.00646032		0.00230577		0.0025942		0.00658964		0.00254882		0.00245778		0.0026405		0.00226832		0.0027242		0.00286559		0.0020195		0.0116331		0.00755336		0.010463		0.00238238		0.00247441		0.00197423
0.00270977		0.00695404		0.0023572		0.00256657		0.00642021		0.00249992		0.00249413		0.00269084		0.00230791		0.00250979		0.00285643		0.00214502		0.0118485		0.0122259		0.0043613		0.00230596		0.00252758		0.00207029
0.00269712		0.00684522		0.00209758		0.00252703		0.00586421		0.00247788		0.00255178		0.00259182		0.00213492		0.00265611		0.00267856		0.00220039		0.00923291		0.0114706		0.00974899		0.00258191		0.00261069		0.00207046
0.00314648		0.00638678		0.00226413		0.00242598		0.00631178		0.002226		0.00249165		0.00243829		0.00219157		0.00284836		0.00268839		0.00207688		0.00964532		0.00831654		0.0105985		0.00256661		0.00258002		0.00221448
0.00321597		0.00639518		0.00231571		0.0024202		0.00635293		0.00222126		0.00249424		0.0024069		0.00220438		0.00246308		0.00257425		0.00231106		0.00641674		0.00713294		0.0107095		0.00230773		0.00262108		0.00218609
0.00252165		0.00665287		0.00210662		0.00238818		0.00583848		0.00249912		0.00251757		0.00271781		0.00224698		0.0026098		0.00233412		0.0020149		0.0090913		0.0101353		0.0103989		0.00232095		0.00250353		0.00205608
0.00281539		0.00673005		0.00210915		0.00260082		0.0064066		0.00221116		0.00237853		0.00265721		0.00222367		0.00284589		0.00269142		0.00206189		0.00821786		0.0107633		0.00996958		0.0022949		0.00234879		0.00216794
0.00301735		0.00780029		0.00213241		0.00249512		0.00677218		0.0023374		0.00242527		0.00282126		0.00225118		0.00262233		0.00298574		0.00228269		0.00793173		0.00682339		0.00978196		0.0023245		0.00234366		0.00217968
0.00344987		0.0058926		0.00214072		0.0026119		0.00645779		0.00236079		0.00227076		0.00281479		0.00252931		0.00283808		0.00295531		0.00200433		0.00955035		0.00779281		0.00783744		0.00225141		0.00238199		0.00208918
0.00295761		0.00792231		0.00231026		0.00267081		0.00668791		0.00210912		0.00228794		0.00260722		0.0024806		0.0027884		0.00273098		0.00204903		0.0090329		0.00669657		0.008889		0.00240664		0.00288609		0.00214488
0.00281936		0.00817646		0.00212204		0.00231131		0.00752361		0.00206309		0.00233464		0.00257561		0.00236715		0.00277038		0.00279804		0.00202694		0.00874307		0.00792825		0.00945522		0.00238037		0.00279246		0.00210569
0.00276801		0.00754546		0.00217526		0.00251256		0.00664841		0.00217614		0.00233864		0.00258759		0.00246731		0.00246033		0.00257431		0.00211816		0.00569578		0.00963045		0.00983053		0.00252153		0.00255885		0.00214711
0.00331253		0.00751739		0.00213707		0.00240483		0.00777396		0.00223058		0.00227127		0.00253308		0.00245084		0.00308472		0.0028248		0.00217446		0.0113396		0.00625622		0.0105215		0.00242387		0.00247914		0.00210384
0.00345619		0.0076789		0.00216292		0.00242849		0.00600885		0.00222119		0.00223821		0.00254231		0.00251862		0.00280702		0.00283728		0.00204995		0.0110148		0.00564395		0.00834606		0.00240725		0.00247629		0.00210428
0.00284409		0.00700545		0.00225463		0.00250411		0.0059634		0.00233243		0.00228734		0.00251888		0.00235504		0.00244811		0.00288368		0.00216736		0.00706102		0.0116555		0.00869526		0.00250716		0.00244429		0.00214199
0.00347822		0.00707445		0.00203353		0.00262613		0.00589485		0.00240987		0.00231171		0.00254346		0.0023501		0.00253773		0.0027006		0.00209478		0.00759759		0.0151164		0.00825038		0.00247603		0.00249747		0.00218974
0.00334542		0.00583002		0.00219944		0.00268642		0.00577279		0.00213694		0.00242282		0.00249192		0.00242603		0.003054		0.00266412		0.00222326		0.0111924		0.0151658		0.0092635		0.0024951		0.00245969		0.00208408
0.00285265		0.00608947		0.00212483		0.00270547		0.00879566		0.00223918		0.00241746		0.00248435		0.00236348		0.00290444		0.00250648		0.00222108		0.0115174		0.0156803		0.0102484		0.00246227		0.00249762		0.00211881
0.00282919		0.00770171		0.00208126		0.00253224		0.0057173		0.00207269		0.00251499		0.00241293		0.00220099		0.002787		0.00252791		0.00216729		0.0112725		0.0118789		0.00954603		0.00237178		0.00233184		0.0020049
0.00294155		0.00843198		0.00216863		0.0028189		0.00577977		0.00215765		0.00257376		0.00243136		0.00212326		0.0028389		0.00259099		0.0020913		0.0120802		0.0119529		0.00791819		0.00240855		0.00234902		0.00203347
0.00290705		0.00714032		0.00213693		0.00267593		0.00586012		0.00219963		0.00224654		0.00264679		0.0021399		0.00258748		0.00263384		0.00213658		0.0128781		0.00791404		0.00864203		0.00238957		0.00243095		0.00215214
0.00282861		0.00697246		0.00218045		0.00277306		0.00614559		0.00220602		0.00223547		0.00238689		0.00225108		0.00307245		0.00278479		0.00215379		0.0136137		0.00776066		0.00654155		0.00238921		0.00249114		0.00223476
0.00318932		0.00614271		0.00212475		0.00279078		0.00630697		0.00231151		0.00248447		0.00242357		0.0022256		0.00319604		0.0025386		0.00202802		0.0104887		0.00675747		0.0070699		0.00262283		0.00247202		0.00226564
0.00264064		0.00631857		0.00203177		0.00275038		0.00801821		0.00227955		0.00249192		0.00239338		0.00222179		0.00279082		0.0025442		0.0020161		0.0123591		0.00614757		0.00994948		0.00283639		0.00243266		0.00206401
0.00305868		0.00676005		0.00211211		0.0024405		0.00876254		0.00241946		0.00230645		0.00263487		0.00222659		0.00328039		0.00284965		0.00197001		0.0132645		0.00884333		0.00436732		0.00281363		0.0023414		0.00212194
0.00283844		0.00655251		0.0022863		0.00234367		0.0104437		0.00241637		0.00244833		0.00260117		0.00225106		0.00335298		0.00315339		0.00202104		0.0115351		0.00834022		0.00578453		0.00233058		0.00229801		0.00210049
0.00331506		0.00613769		0.00227509		0.00257592		0.00803616		0.00243526		0.00226389		0.00262221		0.00225156		0.00261247		0.00302195		0.00216393		0.0127718		0.00822475		0.00792147		0.002352		0.00229241		0.00208488
0.00259739		0.006563		0.00207581		0.00258923		0.00793193		0.00228064		0.00252971		0.00234305		0.00215032		0.00374507		0.00256648		0.0020379		0.0116976		0.0137933		0.00643388		0.00238784		0.0025369		0.00195606
0.00300091		0.00691932		0.0021079		0.00252052		0.00657464		0.00230004		0.00249982		0.00229951		0.00216419		0.00334612		0.00244673		0.00205855		0.010949		0.0134557		0.00887529		0.00238072		0.00254731		0.00213712
0.00266435		0.00659285		0.00204409		0.00241209		0.00958074		0.00242138		0.00261143		0.00241975		0.00217901		0.00332706		0.00239635		0.00207464		0.0119991		0.0135727		0.00967837		0.00246049		0.00240331		0.00215958
0.00309685		0.00738363		0.00204513		0.00245464		0.00615753		0.00244716		0.00255153		0.00234067		0.00224721		0.00326183		0.0026336		0.00209798		0.010666		0.0125854		0.0102626				0.00242397		0.00202069
0.00284099		0.00705032		0.00204983		0.00231508		0.00923494		0.0021672		0.00252833		0.0023846		0.0022445		0.00356303		0.00265943		0.00207408		0.0110281		0.0143227		0.0095084				0.00238728		0.00197193
0.00283437		0.00683396		0.00218739		0.00252804		0.00634641		0.00213282		0.00251226		0.00270175		0.0023108		0.00375106		0.00274802		0.0020709		0.0121293		0.00701327		0.00449112				0.00253372		0.00201387
0.00316561		0.00715121		0.00205714		0.00275246		0.00580053		0.00219705		0.0023559		0.00281634		0.0021693		0.00313915		0.00267958		0.00220376		0.0121039		0.00822657		0.00945562				0.00219827		0.00207907
0.00276247		0.00612465		0.00213243		0.00275616		0.00542785		0.00221734		0.00249427		0.00256803		0.00215125		0.00327492		0.00269663		0.00216829		0.0091842		0.0126356		0.00933749				0.00255655		0.0021361
0.00291821		0.00611837		0.00211867		0.00279501		0.0058691		0.00218992		0.00249415		0.00251178		0.00212273		0.00324425		0.00264957		0.0020161		0.00966491		0.011729		0.00445231				0.0023134		0.00197626
0.00284263		0.00816097		0.00214962		0.00271582		0.00517745		0.00217138		0.00253719		0.00285228		0.00221563		0.00331569		0.00246201		0.00211598		0.00939901		0.0149673		0.00604384				0.00243703		0.00202582
0.00302897		0.0079025		0.00211567		0.00263663		0.00555553		0.00223011		0.00251979		0.00240269		0.00234218		0.00323779		0.00269902		0.0022109		0.00975385		0.0141687		0.00845138				0.00249846		0.00198295
0.00303709		0.0103849		0.00238381		0.00250063		0.00568719		0.00237887		0.00245577		0.00277216		0.0022583		0.00286631		0.00264434		0.00194891		0.00858815		0.00649748		0.00515834				0.00248022		0.00202652
0.00295787		0.00636914		0.00234141		0.00256355		0.00617525		0.00216719		0.00245814		0.00243416		0.00212056		0.002779		0.00249506		0.00222943		0.00810455		0.00831053		0.00537543				0.00233594		0.00198249
0.00298477		0.00650494		0.00227026		0.00257795		0.00672945		0.00217385		0.00252094		0.00253258		0.00201785		0.00260676		0.0025289		0.00222753		0.011956		0.00811084		0.00769936				0.00240167		0.00212132
0.00276856		0.00679068		0.00238975		0.00248731		0.00667242		0.00223153		0.002488		0.00282791		0.00228704		0.00292483		0.00234902		0.00235738		0.0121015		0.00811117		0.0118159				0.00239264		0.00211256
0.0038715		0.00897616		0.0023816		0.00246466		0.00594153		0.00219827		0.00239358		0.00254775		0.00263221		0.00336643		0.00277611		0.00213486		0.00743122		0.00969683		0.0110163				0.00244307		0.00197443
0.00381965		0.00697667		0.00217336		0.00258881		0.00690987		0.00219726		0.00240079		0.0024323		0.00232719		0.00334178		0.00268974		0.00211498		0.00767925		0.00981866		0.00730782				0.00241296		0.00198298
0.00395955		0.0110652		0.00217998		0.00258929		0.00724196		0.00223066		0.00248149		0.00257767		0.00268496		0.00348185		0.00238526		0.00216125		0.0102283		0.0136259		0.00706883				0.00253122		0.00205405
0.00304388		0.00867825		0.00205982		0.00235166		0.00591874		0.0022221		0.00245331		0.00245243		0.00239069		0.0038936		0.00243727		0.00197946		0.00972502		0.0139155		0.00734517				0.00235795		0.00206318
0.0027202		0.00631929		0.00251854		0.00245277		0.00660942		0.00209533		0.00232898		0.00289335		0.00232154		0.00323349		0.00259593		0.00212925		0.0133327		0.00895385		0.00721046				0.002328		0.00211901
0.00277086		0.00599598		0.0025688		0.00238222		0.00665202		0.00235765		0.00248598		0.00267713		0.00233615		0.00273805		0.00255094		0.00215756		0.0122781		0.00645402		0.00891622				0.00233771		0.00215723
0.00344877		0.00880526		0.00207896		0.00242569		0.00627145		0.00235938		0.00241457		0.00317317		0.00207985		0.0024436		0.00256549		0.00204856		0.0136071		0.0105891		0.0103401				0.00262753		0.00226141
0.00277472		0.00592798		0.00231092		0.00280917		0.00553956		0.00230281		0.00249326		0.00297649		0.0024709		0.00263375		0.00258737		0.00205764		0.0128089		0.0103012		0.00937449				0.00240968		0.0022407
0.00288365		0.00595541		0.00230873		0.00279208		0.00590326		0.00233314		0.00245083		0.00253249		0.00231679		0.00246002		0.00262436		0.00207384		0.00918181		0.00803322		0.00926612				0.00240723		0.00199162
0.00299486		0.00644323		0.00231962		0.00250929		0.00641212		0.00233535		0.00240273		0.00252407		0.00228088		0.00239715		0.00246678		0.00205297		0.00922736		0.0077733		0.00648459				0.00234833		0.00238883
0.00345194		0.0086794		0.00222036		0.00246695		0.00587898		0.00232136		0.00262953		0.00258297		0.00215142		0.00348277		0.00295537		0.00202946		0.00979455		0.0105618		0.00737815				0.00239547		0.00197755
0.00382488		0.00793823		0.00214876		0.00240017		0.0059807		0.00220074		0.00257858		0.00266283		0.00287846		0.00297906		0.00275839		0.00233439		0.0138527		0.0120335		0.0111127				0.00244226		0.00207682
0.00331911		0.00775198		0.00216094		0.00253717		0.00654155		0.00225666		0.00264295		0.00251214		0.00232516		0.00377495		0.00282257		0.0023562		0.0138654		0.013591		0.0111904				0.00234076		0.00213723
0.00353044		0.00767831		0.00217032		0.00260914		0.00653978		0.00222146		0.00259505		0.00268439		0.00249322		0.00417315		0.00276136		0.00211053		0.00822159		0.012583		0.0104929				0.00247729		0.00211309
0.00347966		0.00780915		0.00205715		0.00254191		0.00629485		0.00219384		0.002617		0.0026191		0.00314692		0.00316094		0.0025609		0.00213433		0.00858389		0.016612		0.00967365				0.00240721		0.00210764
0.00295917		0.00729443		0.00208041		0.00310729		0.00619636		0.0022218		0.00260672		0.00267512		0.00203502		0.00312966		0.00253241		0.00199397		0.00700622		0.0160099		0.007612				0.0023814		0.00213834
0.0032602		0.00624674		0.00244132		0.00300575		0.00643292		0.0021856		0.00251624		0.00242348		0.00237331		0.00328593		0.00261719		0.00198272		0.0101054		0.00934605		0.00786391				0.00240588		0.00198635
0.00257826		0.00616848		0.00235512		0.00252548		0.00651137		0.00215404		0.00256507		0.00251479		0.00204603		0.00305969		0.00262923		0.00211725		0.00984077		0.0116789		0.0124204				0.00245092		0.00200229
0.00274576		0.0064483		0.00226762		0.00250702		0.00633508		0.00231934		0.00254941		0.00252642		0.00234422		0.00310148		0.00264453		0.00233647		0.0116249		0.0119014		0.011739				0.00253289		0.0020262
0.00295366		0.00741758		0.00225915		0.00243037		0.00586497		0.00239817		0.0025881		0.00256659		0.00220907		0.00292007		0.0024982		0.0023096		0.0117269		0.00883652		0.00923466				0.00255658		0.00201273
0.00293		0.0069194		0.00218036		0.00253138		0.00560864		0.0023612		0.00237703		0.00265698		0.00217097		0.00296253		0.00251434		0.00228764		0.0151761		0.0087649		0.00853773				0.00238326		0.0020705
0.00275424		0.00720167		0.00217744		0.00306145		0.00550417		0.00231849		0.00240383		0.00241505		0.00218563		0.0030172		0.00254316		0.00234237		0.00988091		0.00978007		0.0107384				0.00244262		0.00194907
0.00267713		0.00613607		0.00241959		0.00300341		0.0103434		0.00215581		0.00238547		0.00245269		0.00242691		0.00311755		0.00245255		0.00201465		0.0105883		0.00951985		0.0106025				0.00246365		0.00194993
0.00274728		0.00641501		0.00234638		0.00245017		0.00707308		0.00226049		0.00239214		0.00249404		0.00202487		0.00279642		0.00235605		0.00207839		0.00911663		0.00883939		0.00830772				0.00233942		0.00198754
0.00256095		0.00577866		0.00203463		0.00257416		0.00778934		0.00225832		0.00249329		0.00224436		0.00216008		0.00310777		0.00258841		0.00214781		0.00923701		0.00821156		0.00811568				0.00234067		0.00199281
0.0029052		0.00740266		0.00203017		0.00264455		0.00592396		0.00244444		0.00251289		0.00235458		0.00214559		0.00322306		0.00256059		0.00221384		0.0115799		0.00996939		0.00871715				0.00252552		0.0021471
0.00286734		0.00587494		0.0022954		0.00293603		0.00573279		0.00240797		0.00224904		0.00232994		0.00212523		0.00367143		0.00256363		0.00218937		0.0104546		0.010506		0.00730767				0.00248834		0.00202923
0.00318947		0.00572001		0.00232003		0.00280256		0.00622935		0.00261438		0.00225249		0.00246914		0.00206066		0.00380993		0.0031368		0.00212521		0.00980526		0.0100829		0.00578595				0.00233692		0.00205599
0.00264159		0.00626803		0.00210342		0.00297192		0.00870885		0.00219131		0.00252944		0.00252072		0.00225675		0.00320977		0.00230057		0.00201541		0.00965238		0.00935634		0.00870134				0.00233838		0.00229279
0.00320971		0.00757577		0.00243401		0.00255935		0.00581181		0.00213498		0.00245467		0.00247327		0.00222644		0.00263718		0.00226105		0.00213043		0.0122082		0.0146458		0.00835869				0.00233113		0.00229402
0.00270684		0.00602338		0.00238444		0.00272084		0.00570267		0.00224668		0.0024925		0.00232835		0.00228027		0.00277348		0.00265867		0.00205016		0.0117323		0.0137139		0.0135088				0.00234087		0.00215625
0.00245879		0.00593198		0.00220752		0.00287308		0.00596627		0.00207978		0.00254998		0.00276755		0.00225731		0.00269168		0.0025807		0.00211003		0.00924588		0.0116802		0.0129962				0.00220429		0.00217394
0.00263418		0.00658029		0.00223076		0.00294045		0.00559529		0.00216686		0.00245311		0.00275613		0.00230929		0.00246963		0.00275732		0.00225355		0.00996384		0.0121391		0.00919591				0.00240587		0.00213452
0.00263494		0.00708585		0.00215359		0.00254521		0.00684229		0.00212969		0.00232203		0.00248498		0.00230727		0.00266446		0.00287686		0.00218637		0.00742472		0.0140993		0.0105253				0.00243582		0.00209118
0.00303457		0.00596724		0.00222737		0.00254641		0.00744207		0.00228585		0.00246465		0.00242534		0.00224413		0.00254203		0.00288555		0.00218505		0.00804995		0.0137615		0.00911631				0.00239106		0.00231201
0.00316465		0.00629805		0.00237706		0.00261235		0.00699562		0.0021484		0.00242295		0.00241429		0.00238005		0.00305477		0.00260019		0.00199374		0.0107442		0.00900634		0.00954098				0.00248452		0.00212715
0.00318509		0.00617428		0.00236521		0.00283363		0.00884938		0.00223326		0.00245146		0.00253657		0.00233833		0.00313674		0.00258498		0.00199545		0.00976071		0.0122		0.0115113				0.00253053		0.00215325
0.00240423		0.00591817		0.00225904		0.00277433		0.00612586		0.00234576		0.002483		0.0023371		0.0022502		0.00292255		0.00258322		0.00195961		0.0102191		0.0132626		0.0117434				0.00240288		0.0022374
0.00278343		0.00597851		0.00226532		0.00248652		0.00591478		0.00215835		0.00242386		0.00246669		0.0021781		0.00293883		0.00271589		0.00198397		0.0110065		0.00911597		0.0116125				0.00260021		0.00222757
0.00282197		0.00782276		0.00223568		0.00253501		0.00680396		0.00219655		0.0026302		0.00257667		0.00219311		0.00284582		0.00276267		0.00198298		0.00596269		0.00851496		0.00964206				0.00219845		0.00199091
0.0030851		0.00582129		0.00228776		0.00248281		0.00645563		0.00226511		0.00261918		0.00268291		0.00208862		0.00287653		0.00277638		0.00199203		0.00995499		0.0102143		0.00947109				0.00239485
0.00284738		0.00687665		0.00215		0.00265095		0.0101752		0.00230684		0.00262949		0.00284884		0.00208221		0.00324283		0.00256319		0.0020771		0.0110318		0.0161003		0.00756572				0.00233841
0.00278944		0.00600232		0.0021315		0.00260429		0.00681911		0.00217379		0.00252087		0.00274725		0.00285241		0.00320499		0.00252695		0.00204541		0.00648645		0.0144465		0.00845724				0.00234131
0.0028263		0.00593096		0.0020983		0.00265202		0.00712825		0.00246711		0.00254974		0.00250265		0.00296823		0.00239526		0.00271022		0.0020924		0.0117814		0.0139418		0.00981593				0.00233493
0.00322569		0.00661763		0.00214486		0.00266795		0.00625918		0.0024259		0.00241605		0.00255193		0.00235418		0.00343423		0.00258655		0.00216934		0.0117352		0.0133356		0.0116621				0.00232862
0.00288832		0.00744087		0.00211378		0.00260874		0.00668339		0.0021961		0.0025092		0.00255319		0.00211788		0.00295495		0.00275894		0.00233152		0.00934315		0.0137005		0.0106553				0.00244893
0.0027689		0.00668196		0.00208825		0.00258394		0.00587252		0.00220265		0.00247611		0.00253217		0.00249899		0.00282667		0.00274932		0.00239881		0.00885869		0.0116593		0.00911506				0.00239724
0.00282562		0.00703248		0.00214831		0.00258428		0.00674989		0.0023355		0.00251401		0.00242791		0.00218626		0.00281521		0.00292209		0.00220287		0.00665607		0.0119944		0.00838516				0.00228852
0.0030388		0.00825112		0.00208358		0.00270459		0.00740877		0.00221078		0.00261202		0.00244696		0.00268315		0.00226015		0.00272282		0.0021882		0.0104963		0.0139034		0.0101002				0.00228381
0.00303666		0.00774111		0.00202593		0.00281613		0.00815916		0.0023994		0.00261151		0.00251585		0.0026793		0.00247754		0.00254338		0.00214618		0.0112009		0.012857		0.0110564				0.00238514
0.00260055		0.00635177		0.00207673		0.00243066		0.00660229		0.00207875		0.00261466		0.00244111		0.00235674		0.00262202		0.00255745		0.00219536		0.0128947		0.0108584		0.0115566				0.00242537
0.00299029		0.00675106		0.00226045		0.00243251		0.00629423		0.00210595		0.0025788		0.00235516		0.00248217		0.00279841		0.0025731		0.00205522		0.00925149		0.0112745		0.0146994				0.00240998
0.00331172		0.00641795		0.00231344		0.00248413		0.00733975		0.00211081		0.00251671		0.00255957		0.00242895		0.00250392		0.00261824		0.00205995		0.00919713		0.0161694		0.0141161				0.00225243
0.00331776		0.00736937		0.00233577		0.00256267		0.00806854		0.0021572		0.00243197		0.00261066		0.00221422		0.00260644		0.00265887		0.00203082		0.0130595		0.0171763		0.0139637				0.00227624
0.00307336		0.00837661		0.00229132		0.00300737		0.00890843		0.00209299		0.00246569		0.00258791		0.00216549		0.0027255		0.00262484		0.00204271		0.0117242		0.00794663		0.0139567				0.00223979
0.00355467		0.00650788		0.00213903		0.00236614		0.00852115		0.00208558		0.00256685		0.00238216		0.00213114		0.00262273		0.00271507		0.00197771		0.0136747		0.00791891		0.0141587				0.00235027
0.0027986		0.00708563		0.00218306		0.00226487		0.00808865		0.00204936		0.00256291		0.00264202		0.00258197		0.00348697		0.00243722		0.00206172		0.0152568		0.0104434		0.0135822				0.00231962
0.00281251		0.00635726		0.00216819		0.00236865		0.00832065		0.00219865		0.00264935		0.0025382		0.00252519		0.00265552		0.00215363		0.00208902		0.0136401		0.0113006		0.00919425				0.00227855
0.00300772		0.0081651		0.00236972		0.00237852		0.00889949		0.0022125		0.00262258		0.0022538		0.00221241		0.00244529		0.00213422		0.00205428		0.0118057		0.00802115		0.00804697				0.00278911
0.00247644		0.00899055		0.00235974		0.00290077		0.00959235		0.00222204		0.00253618		0.00262003		0.00246093		0.0026647		0.00260842		0.00212099		0.0114956		0.0122639		0.0110128				0.00279919
0.00263262		0.00589096		0.0022442		0.00295361		0.00934043		0.0021464		0.00249832		0.00259169		0.00244663		0.00270011		0.00288212		0.00205331		0.0110857		0.012431		0.0101749				0.00237745
0.00364754		0.00609082		0.00217622		0.00319466		0.00606248		0.0023282		0.00264309		0.00267349		0.00251775		0.00252479		0.00284911		0.00220595		0.0117864		0.0104465		0.0101121				0.00224771
0.00383584		0.00958044		0.00210193		0.00317252		0.0074232		0.00243831		0.00250874		0.00257165		0.00221473		0.00239255		0.00290086		0.00223246		0.0130796		0.0107879		0.0131418				0.00232158
0.00297773		0.00787904		0.00218877		0.00291517		0.0111673		0.00219941		0.00262724		0.00275938		0.00222374		0.00240146		0.00296958		0.00219709		0.0112802		0.00934159		0.0148798				0.00228407
0.00298344		0.00608207		0.00220635		0.00280148		0.00637196		0.00220522		0.00245134		0.00308203		0.00268882		0.00291932		0.00236907		0.00219167		0.0119062		0.0093255		0.0123266				0.00259548
0.00291247		0.00964563		0.00226673		0.00262999		0.00618653		0.00223676		0.00265929		0.00267092		0.00262938		0.00267946		0.00233373		0.0020847		0.0128029		0.00814878		0.0117398				0.00265554
0.00285985		0.00645958		0.0022667		0.00244019		0.011235		0.00220931		0.00251841		0.00271369		0.00224381		0.0025158		0.00300842		0.00207667		0.0121728		0.0128537		0.0121167				0.0023773
		0.00650326		0.00227623		0.00248868		0.00914766		0.00224313		0.00234651		0.00272455		0.002201		0.00273294		0.00303296		0.00216967		0.00834027		0.0132319		0.0126992				0.00236652
		0.00609278		0.00221688		0.00294008		0.00690559		0.00222606		0.00243586		0.00278259		0.00266151		0.00256255		0.00271219		0.00214686		0.00809562		0.00492473		0.0111282				0.00240563
		0.00675046		0.002158		0.00297355		0.00676593		0.00229196		0.00263526		0.00250531		0.00253596		0.00252833		0.00264766		0.002201		0.0117873		0.0107242		0.0105922				0.002423
		0.00761732		0.00243568		0.0024721		0.00677941		0.00229726		0.00260694		0.00249724		0.00203203		0.00242422		0.00274424		0.00225429		0.0120112		0.00838978		0.012053				0.00246455
		0.0062346		0.00242398		0.00254355		0.0102375		0.00202158		0.00256907		0.0028372		0.00239975		0.00251376		0.00219905		0.00226532		0.0094512		0.00778607		0.0115519				0.00244709
		0.00742045		0.00215324		0.0023907		0.00580418		0.00222756		0.00245456		0.00291942		0.00241053		0.00257587		0.00220464		0.00221426		0.00950738		0.00747042		0.00904148				0.00245726
		0.00722383		0.00227336		0.00293605		0.00588795		0.00228315		0.00248501		0.00308738		0.00253105		0.00262176		0.00290087		0.00225019		0.014241		0.00656482		0.0104439				0.00242308
		0.00723677		0.00203444		0.00285486		0.00865057		0.0022562		0.00239668		0.00277532		0.00260046		0.00294898		0.00292948		0.00233388		0.0133341		0.00801496		0.0126035				0.00245658
		0.00768374		0.00210818		0.00245209		0.0079829		0.0021119		0.00239022		0.00337063		0.00216312		0.00304847		0.00275136		0.00207908		0.0130068		0.0136522		0.0139112				0.0024448
		0.00529468		0.00207983		0.00265406		0.00543109		0.00216501		0.00234531		0.0029808		0.0021507		0.00306795		0.00235471		0.00209091		0.0133122		0.00639969		0.013307				0.00305941
		0.00809983		0.00225484		0.00263507		0.00611047		0.00215836		0.00222817		0.00277894		0.0022034		0.0031554		0.00267015		0.00207257		0.00930852		0.0104843		0.0097312				0.00235944
		0.00584727		0.00231965		0.00245318		0.00605869		0.00227295		0.00227618		0.00281894		0.00214383		0.00322117		0.00282247		0.00207809		0.0122693		0.00853636		0.0106303				0.00234513
		0.00633354		0.00203216		0.00248114		0.00563148		0.00230329		0.00241402		0.00266222		0.00223454		0.00256501		0.00242728		0.00210692		0.0106363		0.00606045		0.0120323				0.00244492
		0.00794433		0.00228647		0.0025383		0.00587993		0.00237505		0.00233834		0.00270488		0.00221052		0.0028618		0.00267343		0.00214314		0.0122311		0.013627		0.0119617				0.00240536
		0.006199		0.00221011		0.00248508		0.00577759		0.00220563		0.00220823		0.00261507		0.00217956		0.00270119		0.00260232		0.00211584		0.0104561		0.0149232		0.0108288				0.00232362
		0.00669184		0.0020872		0.00251104		0.00604697		0.00208761		0.00222427		0.00263034		0.00241638		0.00321406		0.00244688		0.0021228		0.00749905		0.0106123		0.0127062				0.00237454
		0.0083854		0.00208083		0.00235661		0.00600403		0.00205677		0.00243773		0.00257723		0.00238302		0.00273963		0.00246831		0.00214658		0.0101025		0.0141899		0.0112436				0.00239064
		0.00847462		0.00238771		0.002413		0.00567086		0.00219323		0.00235756		0.00247578		0.00233271		0.00266829		0.00234653		0.00210173		0.0075081		0.00598401		0.00620997				0.00227834
		0.00665753		0.00210367		0.00263955		0.00625256		0.0022385		0.00254901		0.00285232		0.00248981		0.00263954		0.00234441		0.0021331		0.00824975		0.00967928		0.00713262				0.00235378
		0.00723749		0.00234704		0.00262004		0.00611834		0.00223744		0.00246451		0.00287927		0.00239777		0.00285907		0.0024552		0.00232899		0.00646411		0.0127224		0.00612845				0.00237341
		0.00693352		0.00220216		0.00230835		0.0063583		0.00219255		0.0024549		0.00300459		0.00247793		0.00293631		0.00240253		0.00215078		0.00850406		0.0117464		0.0065208				0.00246799
		0.00644264		0.00219042		0.00264884		0.00658729		0.00222327		0.00241342		0.0029141		0.00240526		0.00269523		0.00295139		0.00211004		0.00941141		0.0098563		0.00768897				0.00229093
		0.00629918		0.00201984		0.00263868		0.00568162		0.00211623		0.00238707		0.00275085		0.00203017		0.00286122		0.00302616		0.00203779		0.00749973		0.00806883		0.00863737				0.00230859
		0.00591827		0.00201992		0.00275399		0.00646645		0.00246038		0.00237858		0.00278126		0.00213241		0.00266933		0.00329322		0.00215024		0.0101954		0.00968304		0.0086084				0.002427
		0.00591682		0.00216827		0.00273399		0.0062886		0.00247917		0.00248846		0.00277567		0.00209989		0.0027779		0.00325791		0.00224238		0.00950136		0.0123622		0.0139685				0.00241839
		0.00831854		0.00224775		0.00250725		0.00587474		0.00226511		0.00269987		0.00276817		0.00226547		0.0025405		0.00306757		0.00222445		0.00977634		0.014145		0.013468				0.00254133
		0.00602041		0.00210381		0.00251971		0.00541047		0.00226131		0.0026479		0.00248699		0.00208864		0.00272237		0.00312627		0.00228796		0.0134213		0.0134568		0.00686355				0.0024705
		0.00712642		0.00221373		0.00251497		0.00566283		0.00249265		0.00263982		0.00240904		0.00210842		0.00358773		0.00260465		0.00230703		0.0138118		0.0117291		0.00853459				0.00243234
		0.00743014		0.00216767		0.00268954		0.00692746		0.00248089		0.00249091		0.00287051		0.00206303		0.00263631		0.00255875		0.00202902		0.01386		0.011432		0.00823571				0.00241727
		0.00605719		0.00205103		0.00257999		0.00637575		0.00233625		0.00243237		0.00297953		0.00214736		0.00237943		0.0025813		0.00205146		0.0131895		0.0112001		0.00609793				0.00237276
		0.00753707		0.00204907		0.0024631		0.00636134		0.00228569		0.00235196		0.00303377		0.0022117		0.00241951		0.00255374		0.0023277		0.01352		0.0122008		0.00742585				0.00232653
		0.00638657		0.00243243		0.00250852		0.00690384		0.00218583		0.00241568		0.00274454		0.00224496		0.00241596		0.00278116		0.00228019		0.0149379		0.012192		0.0055839				0.00244527
		0.00915775		0.00238253		0.00266179		0.00657415		0.0021903		0.00239914		0.00263774		0.00244574		0.00239595		0.00295342		0.00211154		0.0149999		0.0107697		0.00789763				0.00219455
		0.00691119		0.00219075		0.00245568		0.0077171		0.00245178		0.00240543		0.00259034		0.00245774		0.00250936		0.0028045		0.00207023		0.0120894		0.0109601		0.0122585				0.00248855
		0.00573203		0.00242505		0.00238902		0.00675008		0.00245358		0.00246205		0.00263972		0.00255694		0.00257661		0.00284626		0.00209452		0.00893786		0.0138335		0.0120242				0.00222399
		0.00612147		0.00252844		0.0024078		0.00649297		0.00215717		0.00250438		0.00259196		0.00249955		0.00282968		0.0026946		0.0020842		0.00981601		0.0136339		0.0086399				0.0022174
		0.00637731		0.00212894		0.00257009		0.00643464		0.00240282		0.00279075		0.00257998		0.00251777		0.00264399		0.00261829		0.0021048		0.0102122		0.0135144		0.00910805				0.00236205
		0.00669473		0.00218226		0.00264441		0.00621703		0.00238463		0.00229494		0.00273111		0.00240598		0.00292403		0.00277288		0.00229346		0.0105692		0.0128859		0.00620109				0.00248975
		0.00600904		0.00205603		0.00257025		0.00594382		0.00222892		0.00236095		0.00276544		0.00245912		0.00310918		0.00283281		0.00197394		0.0106854		0.00679559		0.00633013				0.00246863
		0.00641335		0.00209318		0.00255997		0.00602929		0.00243253		0.00237553		0.00273841		0.00222377		0.00334559		0.00271725		0.00211795		0.0129481		0.00717391		0.00747804				0.0023435
		0.00565531		0.00223255		0.00252362		0.00626557		0.00248795		0.00234114		0.00281769		0.00223392		0.0022376		0.00275912		0.00210992		0.0120736		0.00881104		0.00591752				0.00242985
		0.00569385		0.00226964		0.00245656		0.00659766		0.002459		0.00247711		0.0027234		0.00218284		0.00222267		0.00288763		0.00214253		0.0152347		0.0126169		0.0104287				0.00245129
		0.00724106		0.00200056		0.00254003		0.00675791		0.00228997		0.00250243		0.00271921		0.00222469		0.00237681		0.00299842		0.00222237		0.0113402		0.0136748		0.0116312				0.00226821
		0.00559914		0.0021428		0.00233487		0.00629098		0.00234345		0.00251707		0.00250613		0.00222725		0.00279106		0.00260495		0.00222725		0.0130837		0.00772385		0.00703075				0.00268576
		0.00580875		0.00209273		0.00239485		0.00642258		0.00238297		0.00241982		0.00250376		0.0022295		0.00309772		0.00257016		0.00221611		0.00962486		0.00773959		0.0124272				0.00239
		0.0060714		0.0021838		0.00259221		0.00791664		0.00218581		0.00241361		0.00233076		0.00232355		0.00246443		0.00257583		0.00221162		0.00919967		0.00951419		0.00556708				0.00236053
		0.00764618		0.00219733		0.00282355		0.00822593		0.00254208		0.00252308		0.00230894		0.0023223		0.00270881		0.00275223		0.00216265		0.00874855		0.00968393		0.00828011				0.00233659
		0.00859085		0.00216764		0.00275152		0.0062488		0.00245802		0.00252279		0.00231171		0.00225194		0.00242341		0.0025154		0.00201954		0.00986819		0.00894827		0.00957322				0.00234765
		0.00770492		0.00215663		0.00266402		0.00625845		0.00248548		0.00238347		0.00229771		0.00229065		0.00255225		0.00226948		0.00199748		0.0107407		0.00978582		0.00631699				0.00236001
		0.00587478		0.00219948		0.00257215		0.0058214		0.00245402		0.00258352		0.00252149		0.00216678		0.00310392		0.00227059		0.00209774		0.0140074		0.010244		0.00725059				0.0023107
		0.00600247		0.00214855		0.00272658		0.00552334		0.00215469		0.00237281		0.00242889		0.00228388		0.00306894		0.00263908		0.00195455		0.0137494		0.0095856		0.00954947				0.00241492
		0.00590855		0.00211657		0.00278387		0.00584646		0.00226231		0.00235627		0.00245359		0.00247792		0.00261186		0.00287105		0.00237148		0.0151135		0.00723265		0.0072302				0.00237479
		0.00590934		0.00205443		0.0024744		0.00604913		0.00233766		0.0024025		0.00243982		0.00215139		0.00255639		0.00270788		0.00206666		0.0134159		0.0138772		0.00705285				0.00228766
		0.00676098		0.00204308		0.00246643		0.00591019		0.00223055		0.00267637		0.00248622		0.00210587		0.00350846		0.00261835		0.00208645		0.0129963		0.0136281		0.00749095				0.00235631
		0.00687027		0.0022972		0.0029549		0.00647933		0.00227398				0.00263093		0.00223052		0.00326053		0.00301517		0.00213826		0.0141527		0.0080485		0.0073589				0.00233846
		0.00618495		0.00228796		0.00297218		0.00598912		0.00240396				0.0023137		0.00268209		0.00237949		0.00257994		0.00200059		0.011276		0.0114947		0.0058043				0.00230163
		0.00690511		0.00206718		0.00253585		0.00623583		0.00240857				0.00274105		0.00231544		0.0025098		0.00255462		0.00224163		0.0103239		0.0171632		0.00819177				0.00235445
		0.00697689		0.0020523		0.00268048		0.00838869		0.00244571				0.00252275		0.00249639		0.00283199		0.00301973		0.0023408		0.0119226		0.0111491		0.0088119				0.00237712
		0.00675903		0.00212851		0.00233219		0.00896355		0.00273839				0.00281733		0.00258466		0.00277919		0.00286676		0.00206069		0.0114145		0.0130114		0.00616236				0.00237788
		0.00714397		0.00211377		0.00243986		0.0058439		0.00270198				0.00283769		0.00223777		0.00228896		0.00257484		0.00205722		0.0106896		0.0141204		0.00647864				0.00239029
		0.00579764		0.00232118		0.00247553		0.00772263		0.00247352				0.00239854		0.00225655		0.00268054		0.00251479		0.00199675		0.0107709		0.0141744		0.00689616				0.00250271
		0.0057066		0.00223992		0.00266462		0.00924986		0.0024654				0.00240186		0.00235172		0.00264499		0.00293031		0.00217641		0.0109137		0.0114565		0.00647433				0.00245608
		0.00765255		0.00209841		0.00257995		0.00830407		0.00255345				0.00296766		0.00235483		0.00330129		0.00240463		0.00228896		0.00975153		0.00983983		0.00622932				0.00223374
		0.00653303		0.002123		0.00255649		0.00792198		0.00252973				0.00304437		0.00239848		0.0030602		0.00242901		0.00230947		0.0107499		0.0103242		0.0131734				0.0022333
		0.00616207		0.00234277		0.00243779		0.0111665		0.00251281				0.00231134		0.0026382		0.00259043		0.00239967		0.0020698		0.0112513		0.00881977		0.0124956				0.00248896
		0.00515472		0.00236595		0.00241771		0.0104		0.00217328				0.00244397		0.00265746		0.00257721		0.00258671		0.00203592		0.0124728		0.00889914		0.00744237				0.00247943
		0.00536604		0.00210466		0.00267756		0.00664731		0.00225199				0.00237939		0.0025711		0.00240219		0.00255793		0.00215235		0.00968372		0.0107198		0.00725003				0.00253454
		0.00629312		0.00214814		0.00256308		0.00667688		0.00213246				0.00237719		0.00230785		0.00243155		0.00281232		0.0021601		0.0119405		0.00935715		0.0137661				0.00247872
		0.00682405		0.00236625		0.00283609		0.0054675		0.0021511				0.00255981		0.0022253		0.0025021		0.0026569		0.00219121		0.0102425		0.0124456		0.0133771				0.00234812
		0.00554141		0.00214862		0.00258214		0.00642319		0.00216289				0.00247691		0.00233834		0.00243173		0.00249906		0.0021888		0.00950869		0.00945005		0.00875999				0.00225261
		0.0063551		0.00216386		0.00238195		0.00616264		0.00244212				0.0023669		0.00219506		0.00255022		0.0029524		0.00228443		0.0093344		0.00895332		0.00800362				0.00254129
		0.00654155		0.00219676		0.00246809		0.00604057		0.00244115				0.00249676		0.00221717		0.0024471		0.00255421		0.00206247		0.0100383		0.0074208		0.00873501				0.00248871
		0.00582158		0.0023103		0.00280458		0.00552163		0.00248196				0.00248476		0.0023338		0.00257618		0.00244405		0.00202968		0.0114664		0.00692538		0.0120705				0.00260548
		0.00667798		0.00221608		0.00227003		0.00622028		0.00245728				0.0024894		0.00225902		0.00260615		0.00233237		0.00219423		0.0111671		0.00710031		0.00827652				0.00261858
		0.00831354		0.00221439		0.00230897		0.0060248		0.00230055				0.0025204		0.00219294		0.00277131		0.00279921		0.00220776		0.0110305		0.0149889		0.00624384				0.00225377
		0.00658261		0.00230867		0.00230298		0.00586587		0.00251985				0.00245924		0.00263034		0.0026927		0.00275538		0.00226976		0.0100582		0.0125633		0.00477784				0.00239202
		0.0054841		0.00229307		0.00226309		0.00596095		0.00251657				0.00324296		0.00224593		0.00266206		0.00254743		0.00209353		0.00951779		0.0124551		0.00469013				0.00252741
		0.0106606		0.00218234		0.0025399		0.00647636		0.00215215				0.00294752		0.00215343		0.00252523		0.00242447		0.0021567		0.00614275		0.00632951		0.00797723				0.00256354
		0.00793946		0.00216775		0.00239064		0.00565195		0.0022185				0.00238538		0.00234068		0.00289801		0.00263939		0.0019787		0.00520153		0.00923183		0.00750881				0.00227806
		0.00662863		0.00232328		0.0023544		0.00681119		0.0021583				0.00234404		0.00232189		0.00280058		0.00253331		0.00234036		0.00516948		0.0108855		0.0106075				0.00228188
		0.00806229		0.00238367		0.00307609		0.00663905		0.0023815				0.00255148		0.00219443		0.00265527		0.00256391		0.00228045		0.0140489		0.0123504		0.0113495				0.00250769
		0.00776133		0.00226941		0.00305147		0.00621481		0.00238095				0.00253002		0.00221435		0.00261522		0.00271582		0.00197398		0.0139246		0.0138369		0.0109728				0.00255311
		0.00602289		0.00225349		0.00247238		0.00615207		0.00267028				0.002361		0.00231604		0.00291367		0.00290525		0.00197285		0.0120581		0.0129569		0.00828751				0.00258496
		0.00697344		0.00236357		0.00255388		0.00684437		0.00269015				0.00224816		0.00244134		0.00271304		0.00250647		0.00207378		0.0065669		0.0141959		0.00594657				0.00252949
		0.00673499		0.00231257		0.00258027		0.00573107		0.00246132				0.00223522		0.00263577		0.00287519		0.00256118		0.00200831		0.00792486		0.0132363		0.00953635				0.00231344
		0.0062444		0.00216493		0.00238997		0.00583198		0.0024327				0.0025278		0.00228566		0.00286206		0.00297654		0.00195918		0.0117553		0.0155913		0.00964102				0.00227801
		0.00671084		0.00210782		0.0024602		0.0059926		0.00217303				0.00253855		0.00209909		0.00240333		0.00261374		0.00208697		0.00646247		0.00990599		0.00649169				0.00245027
		0.00610152		0.00210022		0.00248261		0.00619498		0.00221777				0.00253892		0.00218517		0.00242173		0.0029725		0.00211227		0.00567567		0.0103374		0.00932193				0.00250211
		0.00584714		0.00210397		0.00251779		0.00573234		0.00228408				0.00230087		0.00225531		0.00286648		0.002787		0.00203412		0.0129694		0.0141119		0.0118214				0.00227192
		0.00718471		0.00220635		0.00232031		0.00861359		0.00228926				0.00251134		0.00228355		0.00283315		0.00268216		0.00215558		0.0126176		0.0137679		0.0128025				0.00253563
		0.00659439		0.00222916		0.00262209		0.00647689		0.00230862				0.0025525		0.00224831		0.00262982		0.00295329		0.00215337		0.0118743		0.012917		0.0124483				0.00222127
		0.00786891		0.00212729		0.00271815		0.00674738		0.00228986				0.00244783		0.00224314		0.00254176		0.00271175		0.00219724		0.00740024		0.008668		0.00741768				0.0023443
		0.00582463		0.00257336		0.00250944		0.00626913		0.00220467				0.00227275		0.0022367		0.00251815		0.00269244		0.0021694		0.0074384		0.00980179		0.00743043				0.00232742
		0.00677162		0.00252966		0.00246574		0.00609335		0.0021523				0.00227144		0.00222569		0.00273393		0.00279952		0.00202643		0.0116639		0.00930489		0.00830106				0.00226699
		0.00719969		0.00217084				0.00851969		0.00210767				0.00234559		0.00233121		0.00278581		0.00278375		0.00208956		0.00995015		0.00789176		0.00797982				0.00234963
		0.00914013		0.00219553				0.00726981		0.00244946				0.00280103		0.00230653		0.00248438		0.00272211		0.00210289		0.00986509		0.00861758		0.0111421				0.00247882
		0.0091597		0.00238442				0.00649002		0.00241679				0.00243245		0.0023611		0.00249266		0.00424501		0.00200002		0.008791		0.00674449		0.0105177				0.00232403
		0.0062556		0.00248745				0.00618361		0.00222155				0.00333215		0.0023219		0.00258736		0.00265729		0.00204925		0.00782068		0.0085873		0.0086666				0.0023231
		0.00626728		0.00220191				0.00822076		0.00223676				0.00335966		0.00216116		0.0029815		0.00238945		0.00200613		0.0117623		0.00651039		0.00871755				0.00240118
		0.0072595		0.0021624				0.00576873		0.00203148				0.00280567		0.00220481		0.00314075		0.00241602		0.00205995		0.00958084		0.00554064		0.0117655				0.00254857
		0.00695511		0.00222281				0.00686919		0.00243376				0.00264743		0.00261343		0.00253025		0.00242764		0.00206209		0.0101727		0.00551725		0.011301				0.00237326
		0.00664593		0.00222424				0.00861261		0.00234045				0.00298923		0.00256051		0.00284695		0.00265687		0.0020025		0.0126488		0.00659547		0.0100932				0.00245164
		0.00714956		0.00218568				0.0090983		0.00203926				0.00231399		0.00237165		0.0027509		0.00249355		0.00198009		0.0059024		0.00598374		0.00963246				0.00256127
		0.00688774		0.00217362				0.00628803		0.00206332				0.00228351		0.00217852		0.00274909		0.002589		0.0020988		0.00582641		0.00532329		0.00705617				0.00254459
		0.00687716		0.00215638				0.00729351		0.00212941				0.00233443		0.00222865		0.00265788		0.00270469		0.00205892		0.0110001		0.00572086		0.00738835				0.00230892
		0.00710042		0.00228082				0.00757942		0.00231281				0.00272985		0.0022848		0.0024731		0.00259745		0.00213236		0.0104603		0.0115873		0.0060058				0.00239842
		0.00677204		0.00228535				0.00575736		0.00226705				0.00280568		0.0022985		0.00231227		0.00232075		0.00209283		0.0105002		0.00662801		0.00908563				0.00236433
		0.00626961		0.0022744				0.00402738		0.00213709				0.00255713		0.00234406		0.0024338		0.00236807		0.00207332		0.00730005		0.00638433		0.0120734				0.00226978
		0.00650223		0.00226644				0.00888902		0.00212331				0.00243964		0.00233572		0.00249107		0.00232385		0.00202279		0.00905396		0.00813117		0.0108515				0.00213889
		0.00919687		0.00222696				0.00606551		0.0022846				0.00253979		0.00235076		0.00294537		0.00259799		0.00205958		0.0109371		0.00959025		0.00941269				0.00222108
		0.0103597		0.00233055				0.00963657		0.00211108				0.00299149		0.00231316		0.00255658		0.00283513		0.00194377		0.0116804		0.0132712		0.00373815				0.00217315
		0.00662509		0.00228956				0.00614187		0.00204254				0.00242891		0.00205572		0.00337383		0.00301383		0.00196411		0.00872384		0.010559		0.0108119				0.00218833
		0.00563133		0.00223552				0.00665215		0.00220895				0.00279613		0.00201225		0.00283139		0.00289247		0.00227324		0.00683886		0.0104235		0.0086734				0.00221304
		0.00536031		0.00222973				0.00787731		0.00219392				0.00293261		0.00218215		0.00377261		0.00294088		0.00217401		0.00960413		0.0101344		0.00919302				0.00217673
		0.00623083		0.00220836				0.00711834		0.00204602				0.0026422		0.00243604		0.00355546		0.00300132		0.00231093		0.00688555		0.00965698		0.0090508				0.00247011
		0.00643017		0.00227364				0.00757895		0.00225441				0.00265659		0.00235222		0.0028874		0.00305053		0.00225735		0.0112195		0.0156731		0.00983738				0.00247868
		0.0069264		0.00223664				0.00627699		0.00235221				0.00271741		0.00226544		0.00287522		0.00292826		0.00210311		0.00525115		0.0159831		0.00915235				0.00241173
		0.00585837		0.00227322				0.00770843		0.00234999				0.00261226		0.00254081		0.00355312		0.00282773		0.00220392		0.00853356		0.00714573		0.00787633				0.00232813
		0.00628789		0.00227182				0.00557107		0.00234715				0.00245492		0.00259345		0.00372318		0.00281113		0.00212208		0.00813855		0.0124039		0.00927241				0.00252259
		0.00674701		0.00226242				0.00556376		0.00223439				0.00254652		0.00225563		0.00290823		0.00281433		0.00217878		0.00976937		0.0114888		0.00835581				0.00247568
		0.00624251		0.00251552				0.00600242		0.00216977				0.00280714		0.0022516		0.00263826		0.00271505		0.0022459		0.00884664		0.0111264		0.00987067				0.00223783
		0.00567337		0.0025657				0.00600908		0.00209719				0.00281816		0.00221694		0.00272719		0.00299376		0.00219728		0.0110991		0.0128828		0.0107544				0.00226987
		0.00549916		0.00229285				0.00603638		0.00219806				0.00259269		0.00242382		0.00290817		0.00295893		0.00219593		0.0125586		0.0148683		0.0106482				0.00221112
		0.0063563		0.00239767				0.00636889		0.0021317				0.00285025		0.00241214		0.00296189		0.00286763		0.00219652		0.0108838		0.014772		0.0108601				0.00241222
		0.00587696		0.00237619				0.00777369		0.00217094				0.00231367		0.00229236		0.00241282		0.00258963		0.0020599		0.0109398		0.0156202		0.0112778				0.00237118
		0.00868693		0.00235673				0.00597547		0.00294759				0.0023483		0.00237326		0.00278911		0.00260125		0.00212822		0.00969158		0.0132075		0.0131114				0.00244524
		0.00598693		0.00248831				0.00601394		0.00244742				0.00273381		0.00242062		0.00273358		0.00242911		0.00208631		0.0117498		0.00940378		0.0128542				0.00229707
		0.0084572		0.00222788				0.00521683		0.00207386				0.00243782		0.00230309		0.00279445		0.00272483		0.00234637		0.0112589		0.0106821		0.012305				0.00232315
		0.00613543		0.00221918				0.00574019		0.00216804				0.00249272		0.00233556		0.00246538		0.00263239		0.00226492		0.0110474		0.00967868		0.00987933				0.00236771
		0.0103584		0.00217592				0.0060558		0.00212441				0.00245615		0.00222418		0.0023819		0.00289946		0.00214689		0.0122253		0.00930941		0.011633				0.00216739
		0.00911922		0.00223785				0.00611191		0.00222866				0.0023956		0.00246855		0.00254331		0.00269747		0.00213746		0.0111829		0.00873318		0.00994045				0.00225642
		0.0089829		0.00254182				0.00570629		0.00227582				0.00255634		0.00245324		0.00305084		0.00270666		0.00241944		0.0113352		0.00853093		0.00790741				0.00227877
		0.00664743		0.00241716				0.00670784		0.00239014				0.00247262		0.00237051		0.00286643		0.00271251		0.00229107		0.0102631		0.00887633		0.00690705				0.00236938
		0.00863559		0.00236693				0.0063342		0.00212048				0.00252154		0.00231741		0.00257612		0.00297345		0.0021988		0.0115791		0.00922173		0.00951165				0.00235691
		0.00773041		0.00211218				0.00630672		0.00209132				0.00251205		0.0022488		0.00275824		0.00301977		0.0021674		0.0113161		0.0132472		0.00922433				0.00245341
		0.00700365		0.00216018				0.00668986		0.00222405				0.00236734		0.00226209		0.00258973		0.00268664		0.00215064		0.00775472		0.0133821		0.00878426				0.00239522
		0.00694893		0.00222645				0.00691632		0.00223218				0.00289777		0.00237998		0.0024097		0.00253457		0.00215423		0.0129098		0.0120289		0.0114051				0.00246776
		0.00546026		0.0022308				0.00631533		0.00227693				0.00290722		0.00209455		0.00263597		0.00277116		0.00214402		0.012853		0.0137549		0.0116001				0.00237433
		0.00621507		0.00223231				0.0059612		0.00227664				0.00282963		0.00246057		0.00284794		0.00268488		0.00256912		0.00813181		0.0145365		0.0103414				0.00247572
		0.00714155		0.0021707				0.00656204		0.00234774				0.00275365		0.00231905				0.00273207		0.0020724		0.00863306		0.00906354		0.00989085				0.00225948
		0.00693594		0.00223126				0.0061767		0.00241453				0.00247749		0.00263851				0.00297327		0.00212787		0.00671586		0.0111164		0.0102522				0.00231617
		0.00735955		0.00224546				0.0069084		0.0022046				0.00249294		0.00267039				0.00319897		0.0021108		0.00977007		0.0112483		0.00861321				0.00227641
		0.00641207		0.00225902				0.00630306		0.00208938				0.00257408		0.00248398				0.0022838		0.00228964		0.0073072		0.0135364		0.00850306				0.00254794
		0.00613311		0.00221904				0.00673331		0.00208786				0.00260121		0.00232809				0.002693		0.00231259		0.0100642		0.0143964		0.00858642				0.00261752
		0.00686505						0.00696553		0.00214263				0.00258935		0.00243999				0.00268613		0.00202603		0.00980815		0.00967564		0.00897128				0.00234855
		0.00533633						0.00654516		0.00213479				0.00264606		0.00247299				0.00278967		0.00199111		0.0090887		0.0104132		0.00673683				0.00261146
		0.0061492						0.00793825		0.00219167				0.00246393		0.00251614				0.00270048		0.00198042		0.0105308		0.00806303		0.0078568				0.00260976
		0.00675078						0.00752993		0.00219918				0.00241392		0.00284028				0.00267884		0.00209852		0.00961475		0.00566427		0.00798203				0.00231709
		0.00666016						0.00690138		0.00211344				0.00260155		0.00217926				0.00265902		0.00218217		0.00812099		0.00545881		0.00908784				0.00234743
		0.0063825						0.00633522		0.00217372				0.00240093		0.00279673				0.00259268		0.00204208		0.0145929		0.0125483		0.00973338				0.00242571
		0.00537882						0.00884706		0.0022429				0.00236497		0.00271998				0.00293494		0.0020512		0.00704158		0.012968		0.0122278				0.00273128
		0.00633606						0.00604097		0.00224852				0.00235512		0.00238582				0.00283992		0.00201178		0.00697328		0.00826142		0.0124984				0.00268997
		0.00536496						0.00586227		0.00217044				0.00296689		0.00216888				0.00256733		0.00266105		0.0101856		0.00791588		0.0122847				0.00252566
		0.00685726						0.0071079		0.00226192				0.00298085		0.00232171				0.00246785		0.00260063		0.0103431		0.0121667		0.0087409				0.00248387
		0.00566941						0.00595263		0.00213794				0.0025983		0.00216572				0.00252891		0.00208601		0.00969725		0.0114579		0.00909975				0.00227023
		0.00579366						0.00619501		0.00216996				0.00256168		0.00271084				0.00303174		0.00231852		0.0128797		0.0120228		0.00903595				0.00225319
		0.00574376						0.00710681		0.00220539				0.00306073		0.00277253				0.00282069		0.00225789		0.0107818		0.0139794		0.00967364				0.00238607
		0.00672506						0.0061203		0.00220692				0.00300608		0.00222208				0.0026625		0.00219262		0.0100643		0.0124759		0.00937301				0.00239306
		0.00632105						0.00647271		0.0022299				0.00305297		0.00232686				0.00247482		0.0021793		0.0100961		0.0137398		0.0101448				0.00254828
		0.00909779						0.00572458		0.00217567				0.00236886		0.00232334				0.00259323		0.00217541		0.00900561		0.0134421		0.0105158				0.0024874
		0.00873785						0.00512954		0.00217156				0.00245243		0.00237529				0.00238792		0.00214442		0.00896941		0.0150782		0.00698254				0.00242918
		0.00925281						0.00739093		0.00226063				0.00239084		0.00280882				0.00312093		0.00228164		0.0104893		0.0144638		0.00683027				0.00247045
		0.00592368						0.00789513		0.00223019				0.00281598		0.0027485				0.00283629		0.00216804		0.0100789		0.0098193		0.00456296				0.0025395
		0.00650995						0.00587836		0.00226262				0.00281712		0.00228255				0.00234461		0.0020721		0.0114784		0.00620008		0.0113689				0.0024969
		0.00706879						0.00585844		0.00205391				0.00354433		0.0025717				0.00258512		0.00213439		0.0112761		0.0166096		0.0107644				0.00241314
		0.00777227						0.00690596		0.00210405				0.00245874		0.00251388				0.00275561		0.00215496		0.00737371		0.015367		0.00781078				0.00248726
		0.00972454						0.00596612		0.00209789				0.00238816		0.00224462				0.00275458		0.0021013		0.00745446		0.00705529		0.00831676				0.00264795
		0.006702						0.00612984		0.00250557				0.00249488		0.00227243				0.00269258		0.00213857		0.0101069		0.00759471		0.00548556				0.00266723
		0.00654337						0.00561177		0.00255609				0.00246014		0.00226401				0.00254804		0.00218166		0.00976565		0.0135446		0.0113397				0.00248154
		0.0061816						0.00572845		0.00253871				0.00236905		0.00207751				0.00269469		0.00216693		0.00657801		0.012894		0.005988				0.00251729
		0.00638286						0.00845323		0.00249633				0.00268122		0.00215373				0.00270818		0.00210731		0.00678309		0.0147038		0.00987212				0.00251546
		0.0059436						0.00707564		0.00242627				0.0026033		0.00216233				0.00297526		0.0021339		0.0119408		0.0134611		0.0055454				0.00251798
		0.00686399						0.00613943		0.00223375				0.00260909		0.00230371				0.00281298		0.00212371		0.0121538		0.011774		0.0114562				0.00231316
		0.0067061						0.0057323		0.00221261				0.00240407		0.00227989				0.00238669		0.00255009		0.0125547		0.0129261		0.00708904				0.00243014
		0.00622899						0.0059305		0.0025844				0.00241923		0.00230042				0.00292686		0.00250377		0.00932846		0.00720168		0.00793034				0.0024843
		0.00623293						0.00523564		0.0025121				0.00262916		0.00261829				0.00285052		0.00222283		0.00936481		0.014259		0.00854331				0.00241463
		0.00653613						0.00534299		0.00262189				0.00278651		0.00264796				0.00256203		0.00228471		0.00904107		0.0139504		0.00933815				0.00252067
		0.00587002						0.00562826		0.00213803				0.00282311		0.00232469				0.00250642		0.00224614		0.00964472		0.0111664		0.0102578				0.00253449
		0.0056757						0.00714523		0.00216464				0.00238251		0.00231604				0.00260301		0.00228328		0.0133273		0.0109272		0.0119566				0.00243353
		0.00620875						0.00694861		0.00217385				0.00270817		0.00226863				0.00266038		0.00228506		0.0126029		0.0132448		0.00602133				0.00240169
		0.00631812						0.00728221		0.00215148				0.00273465		0.00288282				0.00295272		0.00205708		0.0109469		0.0137468		0.00978572				0.00235547
		0.00676205						0.00590362		0.00221354				0.00260755		0.00297643				0.00303248		0.00216258		0.0109978		0.0116696		0.00856958				0.00235014
		0.00652724						0.00574673		0.00220299				0.00269804		0.00251388				0.00258123		0.00207174				0.0115717		0.00848329				0.00249949
		0.00671082						0.00677007		0.00225568				0.0024438		0.00254878				0.00297506		0.00214238				0.00973235		0.00517872				0.00262527
		0.00690816						0.00723324		0.00229903				0.00240474		0.00222817				0.00320218		0.00208348				0.0066255		0.00631846				0.00256346
		0.00681277						0.00695445		0.00262311				0.00270182		0.00218797				0.00275046		0.00221126				0.00656249		0.00585634				0.00241577
		0.00660466						0.00613487		0.00240578				0.00261955		0.00222019				0.00313391		0.00228304				0.00844327		0.00689212				0.0023213
		0.00647253						0.00652803		0.00231997				0.00240452		0.00224629				0.00299584		0.00227374				0.00849018		0.00864897				0.00238247
		0.00529018						0.00660869		0.00213356				0.00241787		0.00230447				0.00285557		0.00252648				0.00808057		0.00680488				0.00227713
		0.00628235						0.00592469		0.00229009				0.00249681		0.00230075				0.00277025		0.00244738				0.00769159		0.00659723				0.00246346
		0.00625255						0.00567561		0.0023002				0.00253742		0.00231097				0.00282226		0.00218978				0.011554		0.00911703				0.00246672
		0.00570188						0.00601467		0.00219357				0.00249185		0.00223235				0.00248738		0.00216044				0.0116519		0.00696115				0.00250479
		0.00582918						0.00668635		0.00222115				0.00240931		0.00253532				0.00239323		0.00209451				0.0129939		0.00882049				0.0025685
		0.00679194						0.00595958		0.00223472				0.00260397		0.00245903				0.00245269		0.00208623				0.0126799		0.00630669				0.00228613
		0.00603894						0.00618004		0.00221625				0.0030874		0.00227508				0.00296331		0.00211421				0.014688		0.00847267				0.00232016
		0.00693856						0.00666012		0.00213929				0.00240592		0.00234927				0.00286284		0.00219885				0.0160193		0.00984063				0.00239407
		0.00739794						0.00587561		0.00225481				0.00274616		0.0022489				0.00267514		0.00211085				0.0146824		0.00871682				0.00237752
		0.00722848						0.00603533		0.00242458				0.00273867		0.00217533				0.00271095		0.00214886				0.0143784		0.00859785				0.0023968
		0.00523386						0.0097129		0.00254551				0.00248426		0.0028513				0.00248673		0.00214688				0.0137829		0.0090119				0.00244756
		0.00664037						0.00565963		0.00238076				0.00280572		0.00283705				0.00235626		0.00214222				0.0133682		0.00888968				0.00249404
		0.00687526						0.00734199		0.002472				0.002446		0.00266593				0.0024326		0.00220586				0.0134439		0.00828838				0.00230997
		0.00738495						0.00647603		0.00237197				0.00252137		0.00234093				0.00292548		0.00213107				0.0113315		0.00849697				0.00229767
		0.0102788						0.00553542		0.00242661				0.0028304		0.00239862				0.00287303		0.00267584				0.0106552		0.0103973				0.00247481
		0.0056196						0.00785631		0.0024218				0.00284561		0.00224122				0.00268728		0.00260873				0.0175522		0.00955725				0.00241824
		0.0060624						0.00675605		0.00216891				0.00251724		0.00222326				0.00276269		0.00223976				0.0174949		0.0120356				0.00237993
		0.00609386						0.00652063		0.00226957				0.00308167		0.00222664				0.00283437		0.00216982				0.0163635		0.012739				0.00237614
		0.00616605						0.00630348		0.00204725				0.00246278		0.00233634				0.00283093		0.0021569				0.0176042		0.0126812				0.0027705
		0.0066126						0.00692334		0.00225361				0.00232938		0.00233445				0.00237306		0.00197765				0.0142641		0.0088405				0.00279211
		0.00774226						0.00586794		0.00205366				0.00246027		0.00219431				0.00239114		0.00231207				0.0152953		0.00796208				0.00274765
		0.00590591						0.00618445		0.00245519				0.00239754		0.00217077				0.00251982		0.00235822				0.0158176		0.00762701				0.00226946
		0.00788367						0.00605586		0.00215157				0.00261256		0.00217224				0.00240946		0.0023546				0.0150656		0.00754109				0.00241976
		0.00770291						0.00663616		0.00206849				0.00262271		0.00225115				0.00267265		0.00232664				0.0135378		0.00604406				0.00238885
		0.00489851						0.00650057		0.00212616				0.00224093		0.00247457				0.0025751		0.00203928				0.0142134		0.00612494				0.00261056
		0.00715234						0.00639137		0.00227296				0.00228341		0.00238209				0.00258534		0.001981				0.018289		0.010292				0.00241961
		0.00912575						0.0063294		0.00224276				0.00264654		0.0021762				0.0028179		0.00209087				0.0170712		0.0109643				0.00236444
		0.00568688						0.00695919		0.0021378				0.00270911		0.00235352				0.00281577		0.00209443				0.0105641		0.0117027				0.00232028
		0.00560205						0.00708711		0.00216426				0.00232474		0.00247866				0.00235262		0.00200129				0.0105066		0.0117352				0.00222721
		0.00568507						0.00706369		0.00204666				0.00267921		0.00240765				0.00233913		0.00195821				0.0130826		0.0122124				0.00241844
		0.00629903						0.00759387		0.00225152				0.00302681		0.00207958				0.00249506		0.00197679				0.0107987		0.00860534				0.00242272
		0.00586771						0.00733749		0.00220325				0.00262007		0.00228836				0.00244821		0.00202331				0.0106706		0.00584598				0.00231046
		0.00720607						0.00641532		0.0021541				0.00261658		0.00234724				0.00258967		0.00199382				0.00520797		0.00594982				0.00229339
		0.00703618						0.00736632		0.00223031				0.00276647		0.00256566				0.00295879		0.00195675				0.0103515		0.0066907				0.00255998
		0.00554523						0.00713919		0.0021663				0.00282454		0.00228161				0.00257157		0.00201613				0.00528158		0.0116043				0.00226462
		0.00646903						0.00726034		0.00207789				0.00247491		0.00236698				0.00248773		0.00205033				0.0135731		0.0114962				0.00235047
		0.00778957						0.00713777		0.00212234				0.00263869		0.00213697				0.00276013		0.0020243				0.0127709		0.0106621				0.0023068
		0.00863648						0.00591481		0.00231431				0.00254149		0.00230858				0.00274328		0.00208708				0.00786056		0.0108665				0.00228108
		0.00547635						0.00679693		0.00229402				0.00258561		0.00233524				0.00321771		0.00208707				0.0149796		0.00569032				0.00226156
		0.00576084						0.00670143		0.00212578				0.00253187		0.00228608				0.00268734		0.00208465				0.0103029		0.00478781				0.00233227
		0.00615967						0.00584618		0.00228274				0.00246438		0.00232811				0.0029106		0.00237873				0.0127476		0.00943525				0.00252165
		0.00862985						0.00512312		0.00228205				0.00258525		0.0020561				0.00255435		0.00253326				0.0124272		0.00948999				0.00243478
		0.00631647						0.00588182		0.00204284				0.00269727		0.00220895				0.00257241		0.00258107				0.01247		0.00612265				0.00245308
		0.00629957						0.00608851		0.00208438				0.00256113		0.00223369				0.00235596		0.00220804				0.0119395		0.00920195				0.00241195
		0.00737986						0.00652354		0.00216463				0.00251747		0.00227555				0.00249045		0.0020738				0.00846601		0.00956184				0.0023869
		0.00606802						0.00519757		0.0021849				0.00264012		0.00228413				0.00256644		0.00209233				0.00862099		0.00967582				0.00258811
		0.00574461						0.00627374		0.00229721				0.00251222		0.0023466				0.00252888		0.00226145				0.0129408		0.00888149				0.0025377
		0.00710352						0.00615224		0.00217809				0.00296521		0.00206402				0.00265111		0.00222861				0.0150861		0.00807127				0.00240779
		0.00726188						0.00639664		0.00222797				0.00268461		0.00204876				0.00267694		0.00230874				0.0154771		0.0124184				0.00239404
		0.00712235						0.00579613		0.0020329				0.00270566		0.00219156				0.00293573		0.00228206				0.0161536		0.0139023				0.00269233
		0.00800646						0.00631965		0.00203555				0.00253513		0.00214848				0.0029331		0.00214209				0.0150274		0.0107527				0.00270186
		0.00516234						0.00658749		0.00218067				0.00295959		0.00210806				0.00264267		0.00213358				0.0140674		0.0125526				0.00250987
		0.00760935						0.00687231		0.00217632				0.0027979		0.0021266				0.00253398		0.00213744				0.0091771		0.0109738				0.00250135
		0.0065542						0.00668614		0.00204279				0.00268815		0.00234783				0.00245051		0.00205999				0.00992961		0.00709388				0.00251004
		0.00572438						0.0098773		0.00203696				0.00255898		0.00229968				0.00243248		0.00207186				0.00853804		0.0096502				0.00224874
		0.0058506						0.00588237		0.00219869				0.0025743		0.00244934				0.00250502		0.00226022				0.00894452		0.00722951				0.00237077
		0.00588113						0.00661985		0.00219103				0.00247625		0.00237953				0.00256515		0.00222018				0.0123647		0.00884008				0.00230377
		0.00732266						0.00647303		0.00215274				0.00248523		0.00204608				0.00290179		0.0021782				0.0118267		0.00896493				0.00242009
		0.00751456						0.00624266		0.00206831				0.00250001		0.00201171				0.00283301		0.00217178				0.0115036		0.013334				0.00244585
		0.00592573						0.00649487		0.00208286				0.00243295		0.002361				0.00284926		0.00220535				0.0107588		0.0113935				0.00240957
		0.0061671						0.0059156		0.00206828				0.00243442		0.00215635				0.00275286		0.00224003				0.0157181		0.00910431				0.00253066
		0.00773342						0.00644615		0.00206919				0.00225229		0.00215809				0.00271597		0.00221857				0.0141542		0.0143581				0.00263189
		0.00582158						0.00590853		0.0020764				0.00254929		0.0021726				0.00248893		0.00220471				0.0135886		0.0146372				0.00242276
		0.00639588						0.00621429		0.00222794				0.00256732		0.00230873				0.00255377		0.00227713				0.0142362		0.0149806				0.00246794
		0.00624538						0.00623216		0.00226855				0.00252043		0.00234168				0.00256334		0.00228427				0.0164147		0.0091743				0.00234464
		0.00895567						0.00648074		0.00211273				0.00255627		0.002282				0.00255423		0.00214606				0.0125474		0.0149411				0.00235795
		0.00685939						0.00666505		0.00201494				0.00237583		0.00228084				0.00242859		0.00213683				0.007345		0.0135383				0.00225218
		0.00713231						0.00597482		0.00248561				0.00248774		0.00212402				0.0025158		0.00223581				0.00852413		0.0134232				0.00240252
		0.00588587						0.00616617		0.00247704				0.00262454		0.00231591				0.00231862		0.002229				0.00485079		0.0127937				0.00237281
		0.00594343						0.00646523		0.00240868				0.00249851		0.00230556				0.00282204		0.00224526				0.00832656		0.0118013				0.00232675
		0.00578945						0.00643269		0.00246414				0.0027774		0.00243059				0.00270142		0.00210523				0.013745		0.0115873				0.00234031
		0.00819734						0.00630167						0.0028682		0.00244376				0.00271898		0.00203626				0.0142586		0.01296				0.00225878
		0.00854046						0.00570791						0.00262478		0.00220984				0.0025459						0.0100061		0.0122419				0.00238664
		0.00770474						0.00570926						0.00249004		0.00217868				0.00273721						0.0146747		0.0129014				0.0023927
		0.00937017						0.00627171						0.00288955		0.00214003				0.00306356						0.0111592		0.0125106				0.00230698
		0.00610089						0.00542194						0.00235118		0.00207029				0.0031433						0.00643233		0.0112977				0.002301
		0.00615465						0.00777421						0.00269831		0.0020591				0.00289177						0.00481088		0.0112103				0.00243313
		0.00560339						0.00703115						0.00254478		0.00203203				0.00304521						0.009029		0.0120244				0.0025549
		0.00557314						0.0102626						0.00268946		0.00202818				0.00270813						0.0115198		0.0123533				0.00239967
		0.00685033						0.00802147						0.00277872						0.0026244						0.0115105		0.0110519				0.00239346
		0.00656616						0.00614765						0.00267677						0.00314837						0.0140898		0.0107544				0.00271793
		0.00609303						0.00619292						0.00317021						0.0032061						0.013508		0.0105352				0.00247444
		0.00616165						0.00766154						0.00319389						0.00240141						0.00828446		0.0103571				0.00251488
		0.00574876						0.00736235						0.00233782						0.00307773						0.00520151		0.00858925				0.00258842
		0.0068868						0.0070943						0.00239387						0.00318067						0.00528453		0.00961089				0.00223895
		0.00693763						0.00615175						0.00256498						0.00263716						0.0115943		0.00805494				0.00221355
		0.0056501						0.00620332						0.00256909						0.00266045						0.0111343		0.00467332				0.00227951
		0.00821435						0.00844388						0.00246711						0.00306633						0.00601659		0.00473207				0.00224621
		0.00793907						0.00592349						0.00246353						0.00311199						0.00658407		0.00553913				0.00237243
		0.00613699						0.00586082						0.00250253						0.00276404						0.00758259		0.00551044				0.00220856
		0.00601852						0.00603143						0.00244197						0.00257036						0.00824983		0.00982643				0.0023622
		0.00647574						0.00605658						0.00268973						0.0028322						0.00950368		0.0095185				0.00238074
		0.00688217						0.00701077						0.0027375						0.00314792						0.00515468		0.0106885				0.00230437
		0.00602251						0.00873742						0.00249059						0.00273597						0.0100951		0.00913222				0.00233802
		0.00655606						0.00802777						0.00255273						0.00304864						0.00872399		0.00907661				0.00259381
		0.00611671						0.00819812						0.00246498						0.00288065						0.0108376		0.00803064				0.00239648
		0.00597695						0.00530066						0.00253598						0.00311025						0.0107288		0.00783829				0.00239051
		0.00584882						0.00550891						0.00261584						0.00326631						0.0137553		0.0102775				0.00250693
		0.00656856						0.00639769						0.0027122						0.00303599						0.0118056		0.00948672				0.00230436
		0.00598565						0.00588023						0.00252291						0.00312385						0.0119563		0.0130285				0.00228342
		0.00634816						0.00594541						0.00267631						0.00239707						0.0120247		0.0114807				0.00249695
		0.0084959						0.00663374						0.00262237						0.00251045						0.0151278		0.00884893				0.00253817
		0.00608233						0.00698705						0.00272249						0.00278338						0.0139168		0.009143				0.00245304
		0.00613196						0.00661025						0.00273841						0.00218891						0.0100174		0.00700881				0.00246747
		0.00523571						0.00633332						0.00238829						0.00297467						0.0115491		0.00705652				0.00256577
		0.00627896						0.00653539						0.00292796						0.00241947						0.00958389		0.0058212				0.00232436
		0.00646141						0.00561952						0.0031825						0.00228013						0.01276		0.00563696				0.00229952
		0.00658848						0.00539341						0.00246479						0.0023769						0.00894506		0.00798576				0.00242088
		0.00758643						0.00596275						0.00243801						0.00266873						0.00908045		0.00830515				0.00224175
		0.0055241						0.00646863						0.00286591						0.00272872						0.00599177		0.0100564				0.00233162
		0.00586366						0.00655545						0.00296413						0.0025937						0.0126536		0.00955554				0.00252551
		0.00604396						0.0090051						0.0026742						0.00269278						0.011753		0.0116367				0.00234683
		0.00622771						0.00645464						0.00252148						0.00250922						0.00822488		0.0123122				0.00224447
		0.00781902						0.00641881						0.00249527						0.00266833						0.00927431		0.00722335				0.00247563
		0.00799517						0.00635532						0.00268135						0.00259863						0.00813011		0.00738211				0.00248015
		0.00636788						0.00631791						0.00270381						0.00296407						0.00792922		0.0111112				0.00216871
		0.00547571						0.00728913						0.00273189						0.00294779						0.00753099		0.0100035				0.00215885
		0.0059815						0.00597045						0.00277423						0.00264239						0.00652536		0.0083677				0.00225649
		0.00615972						0.00834758						0.00249163						0.00255589						0.00677008		0.00869401				0.00244792
		0.00731323						0.00560645						0.00252601						0.00300902						0.0116983		0.00746969				0.00235961
		0.00800686						0.00805575						0.00267489						0.00296618						0.0131378		0.00543375				0.00239854
		0.0070568						0.00626066						0.00256186						0.00291909						0.00837862		0.00496258				0.00228738
		0.00707628						0.00625229						0.00254835						0.00289594						0.00707071		0.00775964				0.00244947
		0.00699258						0.00597215						0.00257271						0.00269994						0.0110735		0.0131966				0.00234055
		0.00601455						0.00631412						0.0023981						0.00291787						0.0157543		0.0136919				0.00236633
		0.00703994						0.00607324						0.003202						0.00269344						0.00736838		0.00689542				0.00238158
		0.00579606						0.00603205						0.00278599						0.00300804						0.00594197		0.00667648				0.00245579
		0.00518296						0.00814653						0.00266237						0.00275768						0.00639048		0.0133982				0.00233067
		0.00652051						0.00841571						0.00263265						0.00266786						0.00608178		0.0135554				0.00231931
		0.0054727						0.00735977						0.00235977						0.00274286						0.00716779		0.00830176				0.00233126
								0.00659944						0.00273564						0.00288191						0.00732391		0.00546843				0.00256021
								0.00564924						0.00281444						0.00247885						0.0070361		0.00565209				0.00227552
								0.00680849						0.00279725						0.0026895						0.00740744		0.00950633				0.00246528
								0.00646836						0.00229149						0.00271221						0.0151818		0.00954126				0.00242423
								0.00595556						0.00230248						0.0025811						0.0148819		0.00906796				0.002472
								0.00598003						0.00230104						0.00243983						0.0119443		0.00921561				0.00242234
								0.00643066						0.00228353						0.00219509						0.0123624		0.0104092				0.00233325
								0.00634628						0.00224562						0.00268645						0.00859864		0.00906305				0.00232973
								0.00645065						0.00252415						0.00246966						0.00793201		0.00539592				0.00231126
								0.00630095						0.00253409						0.00261882						0.0103357		0.00531702				0.00238648
								0.00512049						0.00250079						0.00254937						0.0120323		0.00522795				0.0026016
								0.00563635						0.00240129						0.00272936						0.0111337		0.00943717				0.00254605
								0.00560526						0.00241207						0.00265241						0.008946		0.0101041				0.00238211
								0.00660036						0.0023848						0.00266802						0.0138541		0.00597719				0.00246269
								0.00630337						0.00240316						0.00258542						0.0136965		0.00491306				0.00237044
								0.00619827						0.00274544						0.00236647						0.010277		0.00790313				0.0023696
								0.00674308						0.00299008						0.00259984						0.0115353		0.0105391				0.00235635
								0.00918818						0.00241025						0.00257784						0.00998132		0.0108072				0.0023761
								0.007058						0.00262018						0.00271464						0.0100295		0.0124321				0.0023491
								0.00578906						0.0030584						0.00295695						0.00883391		0.0119779				0.0022949
								0.00681095						0.00248131						0.00286669						0.00834403		0.00718796				0.00243432
								0.00596741						0.003078						0.002899						0.00874683		0.00750683				0.00274509
								0.00616138						0.00315936						0.00255181						0.00867209		0.00972636				0.00279751
								0.00602998						0.00277891						0.00278121						0.0120553		0.0106798				0.00226624
								0.00632889						0.00291813						0.00280671						0.0110061		0.0118825				0.00244851
								0.00604106						0.00282739						0.00287975						0.010332		0.0109535				0.00226479
								0.00711238						0.00252212						0.00262628						0.00574654		0.0104571				0.00233668
								0.00599373						0.00302616						0.00250046						0.00561345		0.0108155				0.00242654
								0.00597464						0.00312281						0.00266373						0.00891398		0.00534548				0.00266254
								0.00599125						0.00246744						0.00299699						0.00900432		0.0054661				0.0024289
								0.00587347						0.00251251						0.00287951						0.0125577		0.0111301				0.00240299
								0.00591607						0.00253445						0.00262154						0.0126413		0.0113316				0.0022944
								0.00920756						0.00258736						0.00258887						0.0124462		0.00850917				0.00228415
								0.0102698						0.00264908						0.00247789						0.0127623		0.00892415				0.00232994
								0.00563945						0.00269784						0.00327964						0.0114609		0.0100759				0.00236456
								0.00561367						0.00281619						0.00330045						0.0116371		0.00934094				0.00249059
								0.00671471						0.00284113						0.00271444						0.0085768		0.00592623				0.00234741
								0.00778564						0.00270669						0.00257235						0.0107379		0.00662427				0.0024774
								0.00594829						0.002617						0.00237841						0.0103651		0.0100829				0.00238069
								0.00626629						0.00259911						0.00254861						0.0146291		0.0101095				0.00256657
								0.00647455						0.00247814						0.00251092						0.0139646		0.0117064				0.00261394
								0.00699888						0.00233719						0.00281577						0.00759367		0.0118638				0.00267047
								0.00580918						0.00254698						0.00278325						0.00829859		0.00576817				0.00243734
														0.00252715						0.00262306						0.00908243		0.00782126				0.00238976
														0.0024277						0.00251928						0.00579293		0.0111505				0.00235682
														0.00237472						0.0026073						0.00898417		0.00931575				0.00234783
														0.0032098						0.00293943						0.00982406		0.00514663				0.0023884
														0.00303737						0.00296201						0.0107366		0.00771706				0.00240942
														0.00265368						0.00264792						0.00573669		0.00781429				0.00246886
														0.0026039						0.00263519						0.00571059		0.0105157				0.00244707
														0.00278551						0.00238016						0.00692449		0.0111734				0.00242414
														0.00281631						0.00236003						0.00558855		0.010204				0.00243177
														0.00255303						0.00260616						0.00467026		0.0100948				0.00252853
														0.00242472						0.00293965						0.00539996		0.00724377				0.00246382
														0.00253488						0.00274133						0.0126604		0.0121697				0.00235824
																				0.00271597						0.00647894		0.0109756				0.002417
																				0.00310704						0.00453102		0.0131359				0.00231178
																				0.00282089						0.00467243		0.0143332				0.00221065
																				0.00275104						0.0065102		0.0129909				0.00243981
																				0.00256557						0.00592691		0.0117091				0.00251829
																				0.00246556						0.00784657		0.00788346				0.0025191
																				0.00267604						0.0112703		0.0101227				0.00225833
																				0.00246164						0.0102657		0.0113717				0.0025732
																				0.00267085						0.0150402		0.00706258				0.00252063
																				0.00277135						0.0147095		0.00662276				0.00239541
																				0.00298427						0.010698		0.00725352				0.00234691
																				0.00294535						0.0104868		0.0114943				0.00240425
																				0.00264912						0.0101125		0.0125035				0.00246926
																				0.0027684						0.014222		0.00726668				0.00244384
																				0.002497						0.0140529		0.00756637
																				0.00263375						0.0136143		0.0068099
																				0.00296447						0.0118651		0.00758683
																				0.00278841						0.0116756		0.00885258
																				0.00278997						0.0135589		0.00918747
																				0.00275899						0.0131521		0.0105235
																				0.00291444						0.00911182		0.0101487
																				0.00253192						0.00914351		0.0088875
																				0.00261347						0.00883022		0.00970047
																				0.00246338						0.00864776		0.00973517
																				0.00256569						0.0084531		0.00995473
																				0.00249485						0.00675564		0.00888769
																				0.00261854						0.0116544		0.00929018
																				0.00262968						0.0121933		0.0117453
																				0.00307697						0.00881583		0.0100247
																				0.00295485						0.0107349		0.0100985
																				0.00303602						0.004658		0.0100075
																				0.00272456						0.00497418		0.00938044
																				0.00268988						0.00711615		0.00951933
																				0.00263923						0.0168455		0.00942508
																				0.00270385						0.0135994		0.00874858
																				0.00285892						0.0151048		0.00810765
																				0.00249039						0.0128934		0.00900329
																				0.00287311						0.0130207		0.00943243
																				0.00278725						0.00813504		0.00917046
																				0.00269496						0.00764123		0.00911482
																				0.00299861						0.00783931		0.00881009
																				0.0029426						0.00675984		0.00921244
																				0.00282141						0.00725627		0.00848426
																				0.00254352						0.00732967		0.00830709
																				0.00258207						0.0066448		0.00741843
																				0.00264426						0.00623696		0.0076398
																				0.00286549						0.00486226
																				0.00276232						0.0123584
																				0.0026147						0.0118997
																				0.00251161						0.0101952
																				0.00253363						0.0100365
																				0.00231704						0.0110636
																				0.00267951						0.00870321
																				0.00300382						0.00858361
																				0.00319455						0.00717883
																				0.00266923						0.00844783
																				0.00281381						0.00480265
																				0.00275155						0.00487338
																				0.0025685						0.00596138
																				0.00263655						0.0130657
																				0.0026921						0.0135538
																				0.0025881						0.011338
																				0.00264868						0.00734632
																				0.00261534						0.00738451
																				0.00275405						0.00826051
																				0.00271372						0.0080664
																				0.00249459						0.00886238
																				0.00261256						0.0064661
																				0.00257638						0.00675644
																				0.00275757						0.0112003
																				0.00286153						0.0121523
																				0.00259002						0.0107302
																				0.0027279						0.009463
																				0.00288002						0.00978153
																				0.00283964						0.0092063
																				0.00256027						0.00934928
																				0.00257916						0.00447449
																				0.00255304						0.00454089
																				0.002596						0.00535131
																				0.00248625						0.00841165
																				0.00268788						0.00798249
																				0.00258728						0.00765589
																				0.00301643						0.00795405
																				0.0030311						0.00891203
																				0.00276005						0.00884004
																				0.00269114						0.00966272
																				0.00257038						0.00635469
																				0.00244011						0.00917974
																				0.00227039						0.00803296
																				0.00245239						0.00783737
																				0.00253875						0.00679994
																				0.00266718						0.00685654
																				0.00270981						0.00932189
																				0.00240023						0.00831009
																				0.00239918						0.00962788
																				0.00312266						0.010942
																				0.0032572						0.0111417
																				0.0025519						0.00798097
																				0.00263518						0.00735691
																				0.00263957						0.0101028
																				0.00277199						0.00956114
																				0.00267985						0.0118537
																				0.00253269						0.0118111
																				0.00261076						0.00759289
																				0.00277607						0.0107867
																				0.00290143						0.0114804
																				0.00248915						0.00520758
																				0.0026714						0.00822153
																				0.0028842						0.00661804
																				0.0030829						0.00783667
																				0.00269095						0.00658391
																				0.00264559						0.00823803
																				0.00293						0.012139
																				0.00284076						0.0121042
																				0.00289414						0.0069098
																				0.00239449						0.00734802
																				0.0023954						0.0110499
																				0.00250972						0.0113069
																				0.0028999						0.00872695
																				0.00296029						0.00651017
																				0.00374334						0.00691037
																				0.00386478						0.00989494
																				0.00290601						0.00993493
																				0.00302488						0.0103175
																				0.00299116						0.0120941
																				0.00301823						0.0123624
																				0.00286695						0.00615503
																				0.00281023						0.00635307
																				0.00279743						0.0123136
																				0.00262662						0.0135918
																				0.00254079						0.0108967
																				0.00341354						0.0117739
																				0.00311101						0.0109728
																				0.0033248						0.0109059
																				0.00302338						0.0123201
																				0.00289919						0.0121643
																				0.00311564						0.00616763
																				0.0028344						0.00638444
																				0.00274687						0.0160566
																				0.00232231						0.0158
																				0.00231895						0.0119781
																				0.00298822						0.0131646
																				0.00284751						0.0140951
																				0.0026077						0.015309
																				0.00235293						0.00793136
																				0.0025841						0.0116704
																				0.00261023						0.0127514
																				0.00257857						0.00647265
																				0.00250529						0.0103274
																				0.00252624						0.0107547
																				0.00292569						0.0110085
																				0.00263207						0.0112293
																				0.00272225						0.00960527
																				0.00317701						0.0099504
																				0.00278046						0.0122771
																				0.00299891						0.0120388
																				0.00292404						0.0126391
																				0.00288538						0.0133718
																				0.00300953						0.0119924
																				0.00281429						0.0122444
																				0.00297201						0.00918164
																				0.0027169						0.00922575
																				0.00268106						0.00780858
																				0.00271531						0.00753734
																				0.00267344						0.00987389
																				0.00294551						0.00942639
																				0.00284777						0.00780205
																				0.00286667						0.00817601
																				0.00291624						0.0092132
																				0.00250292						0.00920438
																				0.00324881						0.00512491
																				0.00274349						0.00666093
																				0.00265374						0.0104445
																				0.00259576						0.0117745
																				0.00259753						0.00821967
																				0.00266799						0.00791362
																				0.00282857						0.0112906
																				0.0028084						0.0120718
																				0.00261122
																				0.00265803
																				0.00281506
																				0.00285615
																				0.00306588
																				0.00323404
																				0.00319519
																				0.00320809
																				0.00318731
																				0.00286251
																				0.00259967
																				0.00275195
																				0.00261683
																				0.00249111
																				0.00264753
																				0.00276022
																				0.00270177
																				0.0026571
																				0.00254627
																				0.00276177
																				0.00268327
																				0.00270202
																				0.00293748
																				0.00279258
																				0.00273854
																				0.00295538
																				0.00283275
																				0.0029649
																				0.00257486
																				0.00291092
																				0.00287482
																				0.00303215
																				0.00301726
																				0.00282211
																				0.00270805
																				0.0028445
																				0.00304545
																				0.00285288
																				0.00275484
																				0.00276722
																				0.00240027
																				0.00248638
																				0.00262307
																				0.00269723
																				0.0024972
																				0.00259349
																				0.00238194
																				0.00249008
																				0.00326658
																				0.00277328
																				0.00283438
																				0.00256107
																				0.00277262
																				0.00266887
																				0.00308204
																				0.0023849
																				0.00262305
																				0.00261597
																				0.00260196
																				0.00274065
																				0.00274592
																				0.00278347
																				0.00289929
																				0.00269767
																				0.00244061
																				0.0030043
																				0.00324422
																				0.00272697
																				0.00272638
																				0.00252057
																				0.00268862
																				0.0027027
																				0.00228948
																				0.00284398
																				0.00280127
																				0.00310092
																				0.00311697
																				0.00263114
																				0.00249146
																				0.00286555
																				0.00293663
																				0.00267713
																				0.00265555
																				0.0024598
																				0.00247961
																				0.00263993
																				0.00292239
																				0.00304913
																				0.0027024
																				0.00286489
																				0.00251341
																				0.00286348
																				0.00273603
																				0.00277733
																				0.00240593
																				0.00279931
																				0.00259889
																				0.00266143
																				0.00259392
																				0.00291665
																				0.00289448
																				0.00246095
																				0.00247224
																				0.00256453
																				0.00261602
																				0.00278401
																				0.002644
																				0.0025697
																				0.00269789
																				0.00265127
																				0.00259018
																				0.00262596
																				0.00247988
																				0.00259186
																				0.00282448
																				0.00270038
																				0.00318352
																				0.00323364
																				0.00258973
																				0.00272877
																				0.00287231
																				0.00283243
																				0.00282234
																				0.00255804
																				0.00253956
																				0.00272893
																				0.00273659
																				0.00261904
																				0.00321074
																				0.0033272
																				0.00306874
																				0.00306534
																				0.00286671
																				0.00280227
																				0.00280364
																				0.00271404
																				0.00254819
																				0.00289829
																				0.00278752
																				0.00267376
																				0.00280258
																				0.0027693
																				0.00284005
																				0.00278826
																				0.0024004
