# Supplementary material for: Homeostatic control of cell wall hydrolysis by the WalRK two-component signaling pathway in Bacillus subtilis
Source: eLife. 2019 Dec 6;8:e52088. doi: 10.7554/eLife.52088 (PMC7299342; doi:10.7554/eLife.52088)
Supplement: Supplementary file 2. [file elife-52088-supp2.xlsx]

## Sheet: Template
	Reagent type. Duplicate rows as needed. Order is flexible, but row titles must be preserved. Species (mandatory if applicable). Append in parentheses. First mention, use full genus. Sex (if applicable). Add within parentheses after species.	Designation. Symbol/name used in publication. Separate multiple entries with semi-colon, space. (If semi-colon within designation, delimit wtith double quotes.)	Source (public). Stock center, company, data repository. Reference. Include PMID or DOI; use “this paper” if new. If neither applies enter “other” and explain in Additional Information.	Identifiers. Format as ID_source:identifier. Separate multiple entries with semi-colon, space. Include catalog numbers, stock numbers, database IDs or accession numbers, RRIDs.	Additional information. Mandatory if column C entry is “this paper” or “other”. Description of new reagent; laboratory from which reagent obtained; other pertinent information. For antibodies, indicate dilution and conditions used.
	Key Resources Table
	Reagent type (species) or resource	Designation	Source or reference	Identifiers	Additional information
	strain, strain background (Bacillus subtilis, strain PY79)	PY79 wild-type	Youngman et al., 1983
	strain, strain background (Bacillus subtilis, strain PY79)	bDR1828	Ben-Yehuda and Losick, 2002	ezrA-gfp (spec)
	strain, strain background (Bacillus subtilis, strain PY79)	bGD95	This study	yvbJ::Pspank-natRBS-walRK (spec)	(see Materials and Methods)
	strain, strain background (Bacillus subtilis, strain PY79)	bGD110	This study	amyE::PiseA-optRBS-venus (cat)	(see Materials and Methods)
	strain, strain background (Bacillus subtilis, strain PY79)	bGD229	This study	ΔwalH::erm amyE::PiseA-optRBS-venus (cat)	(see Materials and Methods)
	strain, strain background (Bacillus subtilis, strain PY79)	bGD230	This study	ΔwalI::erm amyE::PiseA-optRBS-venus (cat)	(see Materials and Methods)
	strain, strain background (Bacillus subtilis, strain PY79)	bGD263	This study	ΔwalRK::lox72 yvbJ::Pspank-natRBS-walRK (spec) amyE::PiseA-optRBS-venus (cat)	(see Materials and Methods)
	strain, strain background (Bacillus subtilis, strain PY79)	bGD294	This study	yvbJ::Phyperspank-optRBS-lytE (spec) amyE::PiseA-optRBS-venus (cat)	(see Materials and Methods)
	strain, strain background (Bacillus subtilis, strain PY79)	bGD300	This study	amyE::PyocH-optRBS-venus (cat)	(see Materials and Methods)
	strain, strain background (Bacillus subtilis, strain PY79)	bGD302	This study	ΔwalH::erm amyE::PyocH-optRBS-venus (cat)	(see Materials and Methods)
	strain, strain background (Bacillus subtilis, strain PY79)	bGD303	This study	ΔwalI::erm amyE::PyocH-optRBS-venus (cat)	(see Materials and Methods)
	strain, strain background (Bacillus subtilis, strain PY79)	bGD308	This study	ΔcwlO::kan ycgO::Pspank-cwlO (erm) amyE::PyocH-optRBS-venus (cat)	(see Materials and Methods)
	strain, strain background (Bacillus subtilis, strain PY79)	bGD312	This study	yvbJ::Phyperspank-optRBS-lytE (spec) amyE::PyocH-optRBS-venus (cat)	(see Materials and Methods)
	strain, strain background (Bacillus subtilis, strain PY79)	bGD315	This study	ΔwalH::erm yvbJ::Phyperspank-optRBS-lytE (spec) amyE::PiseA-optRBS-venus (cat)	(see Materials and Methods)
	strain, strain background (Bacillus subtilis, strain PY79)	bGD325	This study	yvbJ::Phyperspank-optRBS-lytE'-yebA(mepM) (spec) amyE::PiseA-optRBS-venus (cat)	(see Materials and Methods)
	strain, strain background (Bacillus subtilis, strain PY79)	bGD326	This study	yvbJ::Phyperspank-optRBS-lytE'-lytF (cat) amyE::PiseA-optRBS-venus (spec)	(see Materials and Methods)
	strain, strain background (Bacillus subtilis, strain PY79)	bGD327	This study	yvbJ::Phyperspank-optRBS-lytE'-cwlS (cat) amyE::PiseA-optRBS-venus (spec)	(see Materials and Methods)
	strain, strain background (Bacillus subtilis, strain PY79)	bGD328	This study	yvbJ::Phyperspank-optRBS-lytE'-yrvJ (cat) amyE::PiseA-optRBS-venus (spec)	(see Materials and Methods)
	strain, strain background (Bacillus subtilis, strain PY79)	bGD329	This study	yvbJ::Phyperspank-optRBS-lytE'-lytH (cat) amyE::PiseA-optRBS-venus (spec)	(see Materials and Methods)
	strain, strain background (Bacillus subtilis, strain PY79)	bGD347	This study	yvbJ::Phyperspank-optRBS-lytE (spec) amyE::PiseA-optRBS-venus (cat) yhdG::PxylA-optRBS-mciZ (kan)	(see Materials and Methods)
	strain, strain background (Bacillus subtilis, strain PY79)	bGD348	This study	ΔcwlO::kan ycgO::Pspank-cwlO (erm) amyE::PyocH-optRBS-venus (cat) yhdG::PxylA-optRBS-mciZ (phleo)	(see Materials and Methods)
	strain, strain background (Bacillus subtilis, strain PY79)	bGD371	This study	ΔlytE::kan amyE::PiseA-optRBS-venus (cat)	(see Materials and Methods)
	strain, strain background (Bacillus subtilis, strain PY79)	bGD372	This study	ΔsigI::kan amyE::PiseA-optRBS-venus (cat)	(see Materials and Methods)
	strain, strain background (Bacillus subtilis, strain PY79)	bGD373	This study	ΔlytE::kan amyE::PyocH-optRBS-venus (cat)	(see Materials and Methods)
	strain, strain background (Bacillus subtilis, strain PY79)	bGD374	This study	ΔsigI::kan amyE::PyocH-optRBS-venus (cat)	(see Materials and Methods)
	strain, strain background (Bacillus subtilis, strain PY79)	bGD375	This study	ΔlytE::kan yvbJ::Phyperspank-optRBS-lytE (spec) amyE::PiseA-optRBS-venus (cat)	(see Materials and Methods)
	strain, strain background (Bacillus subtilis, strain PY79)	bGD376	This study	ΔsigI::kan yvbJ::Phyperpsank-optRBS-lytE (spec) amyE::PiseA-optRBS-venus (cat)	(see Materials and Methods)
	strain, strain background (Bacillus subtilis, strain PY79)	bGD389	This study	yvbJ::Phyperspank-optRBS-lytE*C247S (spec) amyE::PiseA-optRBS-venus (cat)	(see Materials and Methods)
	strain, strain background (Bacillus subtilis, strain PY79)	bGD421	This study	ΔwalI::lox72 yhdG::PxylA-optRBS-walI (erm) yvbJ::Phyperspank-optRBS-lytE (spec) amyE::PiseA-optRBS-venus (cat)	(see Materials and Methods)
	strain, strain background (Bacillus subtilis, strain PY79)	bGD422	This study	ΔwalI::lox72 yhdG::PxylA-optRBS-walIΔECD(36-280) (erm) yvbJ::Phyperspank-optRBS-lytE (spec) amyE::PiseA-optRBS-venus (cat)	(see Materials and Methods)
	strain, strain background (Bacillus subtilis, strain PY79)	bGD426	This study	ΔwalH::lox72 yhdG::Pxyl-natRBS-walH (kan) yvbJ::Phyperspank-optRBS-lytE (spec) amyE::PiseA-optRBS-venus (cat)	(see Materials and Methods)
	strain, strain background (Bacillus subtilis, strain PY79)	bGD427	This study	ΔwalH::lox72 ycgO::Pxyl-natRBS-walHΔECD(61-455) (erm) yvbJ::Phyperspank-optRBS-lytE (spec) amyE::PiseA-optRBS-venus (cat)	(see Materials and Methods)
	strain, strain background (Bacillus subtilis, strain PY79)	bGD446	This study	ΔwalRK::erm yhdG::walRKHI (kan) yvbJ::Phyperspank-optRBS-lytE (spec) amyE::PiseA-optRBS-venus (cat)	(see Materials and Methods)
	strain, strain background (Bacillus subtilis, strain PY79)	bGD435	This study	yhdG::walRKHI (kan) amyE::PiseA-optRBS-venus (cat) DwalRK::erm	(see Materials and Methods)
	strain, strain background (Bacillus subtilis, strain PY79)	bGD436	This study	yhdG::walRKHI (kan) amyE::PyocH-optRBS-venus (cat) DwalRK::erm	(see Materials and Methods)
	strain, strain background (Bacillus subtilis, strain PY79)	bGD452	This study	ΔwalI::erm yvbJ::Phyperspank-optRBS-lytE (spec) amyE::PiseA-optRBS-venus (cat)	(see Materials and Methods)
	strain, strain background (Bacillus subtilis, strain PY79)	bGD479	This study	ΔwalHI::tet yvbJ::Phyperspank-optRBS-lytE (spec) amyE::PiseA-optRBS-venus (cat)	(see Materials and Methods)
	strain, strain background (Bacillus subtilis, strain PY79)	bGD500	This study	ΔwalRK::erm yhdG::walRK(Δ44-167)HI (tet) amyE::PiseA-optRBS-venus (cat)	(see Materials and Methods)
	strain, strain background (Bacillus subtilis, strain PY79)	bGD501	This study	ΔwalRK::erm yhdG::walRK(Δ44-167)HI (tet) amyE::PyocH-optRBS-venus (cat)	(see Materials and Methods)
	strain, strain background (Bacillus subtilis, strain PY79)	bGD502	This study	ΔwalRK::erm yhdG::walRK(Δ44-167)HI (tet) yvbJ::Phyperspank-optRBS-lytE (spec) amyE::PiseA-optRBS-venus (cat)	(see Materials and Methods)
	strain, strain background (Bacillus subtilis, strain PY79)	bGD535	This study	ezrA-gfp (spec) yhdG::PxylA-optRBS-mciZ (kan)	(see Materials and Methods)
	strain, strain background (Bacillus subtilis, strain PY79)	bGD559	This study	ΔwalHI::tet yhdG::PxylA-optRBS-walI (erm) ycgO::PxylA-optRBS-walH (kan) yvbJ::Phyperspank-optRBS-lytE (spec) amyE::PiseA-optRBS-venus (cat)	(see Materials and Methods)
	strain, strain background (Bacillus subtilis, strain PY79)	bGD562	This study	ΔwalHI::tet yhdG::PxylA-optRBS-walIΔECD(36-280) (erm) ycgO::PxylA-optRBS-walHΔECD(61-455) (kan) yvbJ::Phyperspank-optRBS-lytE (spec) amyE::PiseA-optRBS-venus (cat)	(see Materials and Methods)
	strain, strain background (Bacillus subtilis, strain PY79)	bGD591	This study	ΔwalH::lox72 ycgO::PxylA-optRBS-walH (kan) yvbJ::Phyperspank-optRBS-lytE (spec) amyE::PiseA-optRBS-venus (cat)	(see Materials and Methods)
	strain, strain background (Bacillus subtilis, strain PY79)	bGD592	This study	ΔwalH::lox72 ycgO::PxylA-optRBS-walHΔECD(61-455) (kan) yvbJ::Phyperspank-optRBS-lytE (spec) amyE::PiseA-optRBS-venus (cat)	(see Materials and Methods)
	strain, strain background (Bacillus subtilis, strain PY79)	bGD615	This study	amyE::PiseA-optRBS-venus (cat) ΔprkC::erm	(see Materials and Methods)
	strain, strain background (Bacillus subtilis, strain PY79)	bGD616	This study	amyE::PiseA-optRBS-venus (cat) yvbJ::Phyperspank-optRBS-lytE (spec) ΔprkC::erm	(see Materials and Methods)
	strain, strain background (Bacillus subtilis, strain PY79)	bGD617	This study	amyE::PyocH-optRBS-venus (cat) ΔprkC::erm	(see Materials and Methods)
	strain, strain background (Bacillus subtilis, strain PY79)	bGD618	This study	amyE::PyocH-optRBS-venus (cat) yvbJ::Phyperspank-optRBS-lytE (spec) ΔprkC::erm	(see Materials and Methods)
	strain, strain background (Bacillus subtilis, strain PY79)	bGD629	This study	DwalRK::lox72 yhdG::walRK(Δ44-167)HI (tet) ycgO::Pspank-5'UTR-cwlO(erm) DcwlO::kan amyE::PyocH-optRBS-venus (cat)	(see Materials and Methods)
	strain, strain background (Bacillus subtilis, strain PY79)	bJM58	Meisner et al., 2013	ΔlytE::kan
	strain, strain background (Bacillus subtilis, strain PY79)	bJM54	Meisner et al., 2013	ΔcwlO::cat
	strain, strain background (Bacillus subtilis, strain PY79)	bJM76	Meisner et al., 2013	ΔlytE::cat
	strain, strain background (Bacillus subtilis, strain PY79)	bJM406	Meisner et al., 2013	ΔcwlO::cat ycgO::Pspank-5’UTR-cwlO (erm) ΔlytE::kan
	strain, strain background (Bacillus subtilis, strain PY79)	bJM433	Meisner et al., 2013	ΔcwlO::kan ycgO::Pspank-5’UTR-cwlO (erm)
	strain, strain background (Bacillus subtilis, strain PY79)	bJM967	Meisner et al., 2013	ΔcwlO::kan ycgO::Pspank-5’UTR-cwlO (erm) ΔsigI::cat
	strain, strain background (Bacillus subtilis, strain PY79)	bYB21	Brunet et al., 2019	ycgO::Pspank-natRBS-lytE (spec)
	strain, strain background (Bacillus subtilis, strain PY79)	bYB282	This study	lytE::cat ycgO::Pspank-natRBS-lytE (spec) sacA::Pveg-mcherry (tet) DcwlO::kan	(see Materials and Methods)
	strain, strain background (Bacillus subtilis, strain PY79)	bYB508	This study	sacA::Pveg-mcherry (tet)	(see Materials and Methods)
	strain, strain background (Bacillus subtilis, strain PY79)	bYB668	This study	sacA::Pveg-mcherry (tet) DlytE::cat	(see Materials and Methods)
	strain, strain background (Bacillus subtilis, strain PY79)	bYB669	This study	sacA::Pveg-mcherry (tet) DcwlO::cat	(see Materials and Methods)
	strain, strain background (Bacillus subtilis, strain PY79)	bYB729	This study	ycgO::PlytE-optRBS-lacZ (erm)	(see Materials and Methods)
	strain, strain background (Bacillus subtilis, strain PY79)	bYB902	This study	amyE::PlytE-optRBS-lacZ (kan)	(see Materials and Methods)
	strain, strain background (Bacillus subtilis, strain PY79)	bYB919	This study	amyE::PlytE-optRBS-lacZ (kan) ΔsigI::cat	(see Materials and Methods)
	strain, strain background (Bacillus subtilis, strain PY79)	bYB921	This study	amyE::PlytE-optRBS-lacZ (kan) ΔcwlO::cat	(see Materials and Methods)
	strain, strain background (Bacillus subtilis, strain PY79)	bYB927	This study	amyE::PlytE-optRBS-lacZ (kan) ΔrsgI::spec	(see Materials and Methods)
	strain, strain background (Bacillus subtilis, strain PY79)	bYB942	This study	amyE::PlytE-optRBS-lacZ (kan) ΔlytE::cat	(see Materials and Methods)
	strain, strain background (Bacillus subtilis, strain PY79)	bYB962	This study	∆lytE::kan yvbJ::Phyperspank-optRBS-lysM3-mepM(D,D-endo) (spec)	(see Materials and Methods)
	strain, strain background (Bacillus subtilis, strain PY79)	bYB1065	This study	ycgO::PlytE-optRBS-lacZ yvbJ::Phyperspank-optRBS-lytE (spec)	(see Materials and Methods)
	strain, strain background (Bacillus subtilis, strain PY79)	bYB1081	This study	ycgO::PlytE-optRBS-lacZ (erm) ΔrsgI::spec	(see Materials and Methods)
	strain, strain background (Bacillus subtilis, strain PY79)	bYB1117	This study	ycgO::PlytE-optRBS-lacZ (erm) ΔrsgI::spec yvbJ::Phyperspank-optRBS-lytE (spec)	(see Materials and Methods)
	strain, strain background (Bacillus subtilis, strain PY79)	bYB1185	This study	sacA::Pveg-mcherry (tet) ΔlytE::cat yvbJ::Pspank-optRBS-lytE (spec) ΔcwlO::kan	(see Materials and Methods)
	strain, strain background (Bacillus subtilis, strain PY79)	bYB1296	This study	∆cwlO yhdG::PxylA-natRBS-lytE (kan) ΔlytE::tet	(see Materials and Methods)
	strain, strain background (Bacillus subtilis, strain PY79)	bYB1303	This study	∆cwlO yhdG::PxylA-natRBS-lytE (kan) ΔlytE::tet yhdG::Phyperspank-optRBS-lytE (cat)	(see Materials and Methods)
	strain, strain background (Bacillus subtilis, strain PY79)	bYB1304	This study	∆cwlO yhdG::PxylA-natRBS-lytE (kan) ΔlytE::tet yvbJ::Phyperspank-optRBS-lytE’-lytF (cat)	(see Materials and Methods)
	strain, strain background (Bacillus subtilis, strain PY79)	bYB1305	This study	∆cwlO yhdG::PxylA-natRBS-lytE (kan) ΔlytE::tet yvbJ::Phyperspank-optRBS-lytE’-cwlS (cat)	(see Materials and Methods)
	strain, strain background (Bacillus subtilis, strain PY79)	bYB1306	This study	∆cwlO yhdG::PxylA-natRBS-lytE (kan) ΔlytE::tet yvbJ::Phyperspank-optRBS-lytE’-mepS (cat)	(see Materials and Methods)
	strain, strain background (Bacillus subtilis, strain PY79)	bYB1307	This study	∆cwlO yhdG::PxylA-natRBS-lytE (kan) ΔlytE::tet yvbJ::Phyperspank-optRBS-lytE’-yrvJ (cat)	(see Materials and Methods)
	strain, strain background (Bacillus subtilis, strain PY79)	bYB1309	This study	∆cwlO yhdG::PxylA-natRBS-lytE (kan) ΔlytE::tet yvbJ::Phyperspank-optRBS-lytE’-lytH (cat)	(see Materials and Methods)
	strain, strain background (Bacillus subtilis, strain PY79)	bYB1313	This study	∆cwlO yhdG::PxylA-natRBS-lytE (kan) ΔlytE::tet yvbJ::Phyperspank-optRBS-lytE’-mepM (spec)	(see Materials and Methods)
	strain, strain background (Bacillus subtilis, strain PY79)	bYB1344	This study	ycgO::PyocH-optRBS-lacZ (erm)	(see Materials and Methods)
	strain, strain background (Bacillus subtilis, strain PY79)	bYB1348	This study	ycgO::PiseA-optRBS-lacZ (erm)	(see Materials and Methods)
	strain, strain background (Bacillus subtilis, strain PY79)	bYB1362	This study	ycgO::PiseA-optRBS-lacZ yvbJ::Phyperspank-optRBS-lytE (spec)	(see Materials and Methods)
	strain, strain background (Bacillus subtilis, strain PY79)	bYB1363	This study	ycgO::PiseA-optRBS-lacZ (erm) ΔcwlO::cat	(see Materials and Methods)
	strain, strain background (Bacillus subtilis, strain PY79)	bYB1365	This study	ycgO::PiseA-optRBS-lacZ (erm) ΔsigI::cat	(see Materials and Methods)
	strain, strain background (Bacillus subtilis, strain PY79)	bYB1367	This study	ycgO::PyocH-optRBS-lacZ (erm) ΔcwlO::cat	(see Materials and Methods)
	strain, strain background (Bacillus subtilis, strain PY79)	bYB1369	This study	ycgO::PyocH-optRBS-lacZ (erm) ΔsigI::cat	(see Materials and Methods)
	strain, strain background (Bacillus subtilis, strain PY79)	bYB1370	This study	ycgO::PyocH-optRBS-lacZ yvbJ::Phyperspank-optRBS-lytE (spec)	(see Materials and Methods)
	strain, strain background (Bacillus subtilis, strain PY79)	bYB1379	This study	ycgO::PlytE(∆walR2-box)-optRBS-lacZ (erm)	(see Materials and Methods)
	strain, strain background (Bacillus subtilis, strain PY79)	bYB1382	This study	yvbJ::Phyperspank-optRBS-lytE*C247S (spec) ycgO::PlytE-optRBS-lacZ (erm)	(see Materials and Methods)
	strain, strain background (Bacillus subtilis, strain PY79)	bYB1383	This study	yvbJ::Phyperspank-optRBS-lytE*C247S (spec) ycgO::PyocH-optRBS-lacZ (erm)	(see Materials and Methods)
	strain, strain background (Bacillus subtilis, strain PY79)	bYB1384	This study	yvbJ::Phyperspank-optRBS-lytE*C247S (spec) ycgO::PiseA-optRBS-lacZ (erm)	(see Materials and Methods)
	strain, strain background (Bacillus subtilis, strain PY79)	bYB1400	This study	ΔwalH::lox72 ycgO::PlytE-optRBS-lacZ (erm)	(see Materials and Methods)
	strain, strain background (Bacillus subtilis, strain PY79)	bYB1402	This study	ΔcwlO::cat ycgO::Pspank-5’UTR-cwlO (erm) ΔlytE::kan yvbJ::lytE (spec)	(see Materials and Methods)
	strain, strain background (Bacillus subtilis, strain PY79)	bYB1426	This study	ΔcwlO::cat ycgO::Pspank-5’UTR-cwlO (erm) ΔlytE::kan yvbJ::lytE(∆walR2-box) (spec)	(see Materials and Methods)
	strain, strain background (Bacillus subtilis, strain PY79)	bYB1432	This study	∆walH ycgO::PlytE-optRBS-lacZ (erm) yvbJ::Phyperspank-optRBS-lytE (spec)	(see Materials and Methods)
	strain, strain background (Bacillus subtilis, strain PY79)	bYB1433	This study	ΔwalH::lox72 ycgO::PlytE-optRBS-lacZ (erm) yvbJ::Phyperspank-optRBS-lytE (spec)	(see Materials and Methods)
	strain, strain background (Bacillus subtilis, strain PY79)	bYB1471	This study	amyE::PlytE-optRBS-venus (cat)	(see Materials and Methods)
	strain, strain background (Bacillus subtilis, strain PY79)	bYB1473	This study	amyE::PlytE-optRBSvenus (cat) ΔcwlO::kan	(see Materials and Methods)
	strain, strain background (Bacillus subtilis, strain PY79)	bYB1474	This study	amyE::PlytE-optRBS-venus (cat) yvbJ::Phyperspank-optRBS-lytE (spec)	(see Materials and Methods)
	strain, strain background (Bacillus subtilis, strain PY79)	bYB1475	This study	amyE::PlytE-optRBS-venus (cat) yvbJ::Phyperspank-optRBS-lytE*C247S (spec)	(see Materials and Methods)
	strain, strain background (Bacillus subtilis, strain PY79)	bYB1504	This study	sacA::Pveg-mcherry (tet) yhdG::PxylA-spoIVFB(E44Q)-gfp (kan)	(see Materials and Methods)
	strain, strain background (Bacillus subtilis, strain PY79)	bYB1505	This study	sacA::Pveg-mcherry (tet) yhdG::PxylA-spoIVFB(E44Q)-gfp (kan) cwlO::cat	(see Materials and Methods)
	strain, strain background (Bacillus subtilis, strain PY79)	bYB1506	This study	sacA::Pveg-mcherry (tet) yhdG::PxylA-spoIVFB(E44Q)-gfp (kan) ycgO::Phyperspank-optRBS-iseA (erm)	(see Materials and Methods)
	strain, strain background (Bacillus subtilis, strain PY79)	bYB1507	This study	sacA::Pveg-mcherry (tet) yhdG::PxylA-spoIVFB(E44Q)-gfp (kan) ycgO::Phyperspank-optRBS-iseA (erm) cwlO::cat	(see Materials and Methods)
	strain, strain background (Escherichia coli)	BTH101	Bernhardt Lab	F-, cya-99, araD139, galE15, galK16, rpsL1 (Strr), hsdR2, mcrA1,mcrB1
	recombinant DNA reagent	pAM187	This study	yvbJ::Pspank-natRBS-walRK (spec)	(see Materials and Methods)
	recombinant DNA reagent	pCH364	Bendezú et al., 2009	Plac-T18 lacIq bla pUC ori
	recombinant DNA reagent	pLPT10	Paulsson Lab	proC-UA-VenusNatBio-T1
	recombinant DNA reagent	pGD015	This study	amyE::optRBS-venus (cat)	(see Materials and Methods)
	recombinant DNA reagent	pGD018	This study	amyE::PiseA-optRBS-venus (cat)	(see Materials and Methods)
	recombinant DNA reagent	pGD021	This study	yhdG::PxylA-spoIVFB(E44Q)-gfp (kan)	(see Materials and Methods)
	recombinant DNA reagent	pGD022	This study	yhdG::PxylA-optRBS-mciZ (kan)	(see Materials and Methods)
	recombinant DNA reagent	pGD055	This study	amyE::PyocH-optRBS-venus (cat)	(see Materials and Methods)
	recombinant DNA reagent	pGD061	This study	yhdG::Pxyl-optRBS-mciZ (phleo)	(see Materials and Methods)
	recombinant DNA reagent	pGD062	This study	yhdG::walRK (kan)	(see Materials and Methods)
	recombinant DNA reagent	pGD073	This study	yhdG::walRKHI (kan)	(see Materials and Methods)
	recombinant DNA reagent	pGD090	This study	yhdG::walRK(D44-167)-walHI (tet)	(see Materials and Methods)
	recombinant DNA reagent	pGD101	This study	ycgO::PxylA-optRBS-walH (kan)	(see Materials and Methods)
	recombinant DNA reagent	pGD102	This study	ycgO::PxylA-optRBS-walHDECD(61-455) (kan)	(see Materials and Methods)
	recombinant DNA reagent	pGD115	This study	pKT25_Plac-T25-walK kan pACYC ori	(see Materials and Methods)
	recombinant DNA reagent	pGD118	This study	pCH364_Plac-T18-walH lacIq bla pUC ori	(see Materials and Methods)
	recombinant DNA reagent	pGD120	This study	pCH364_Plac-T18-walI lacIq bla pUC ori	(see Materials and Methods)
	recombinant DNA reagent	pGD122	This study	pCH364_Plac-T18-walHI lacIq bla pUC ori	(see Materials and Methods)
	recombinant DNA reagent	pGD123	This study	pKT25_Plac-T25-walK(∆44-167) kan pACYC ori	(see Materials and Methods)
	recombinant DNA reagent	pJM63	This study	PT7-6xHis-SUMO-cwlODcc (amp)	(see Materials and Methods)
	recombinant DNA reagent	pKT25	Karimova et al., 2001	Plac-T25- kan pACYC ori
	recombinant DNA reagent	pKT25-zip	Karimova et al., 2001	Plac-T25-leucine zipper region from yeast GCN4. kan pACYC ori
	recombinant DNA reagent	pTB146	Bendezú et al., 2009	PT7-SUMO-6xHis (amp)
	recombinant DNA reagent	pUT18C	Karimova et al., 2001	Plac-T18-, bla
	recombinant DNA reagent	pUT18C-zip	Karimova et al., 2001	Plac-T18-leucine zipper region from yeast GCN4. bla
	recombinant DNA reagent	pYB018	This study	PT7-6xHis-SUMO-lytEDlysMx3 (amp)
	recombinant DNA reagent	pYB061	Brunet et al., 2019	yvbJ::PxylA-natRBS-lytE (cat)
	recombinant DNA reagent	pYB064	This study	ycgO::Pveg-optRBS-lacZ (erm)	(see Materials and Methods)
	recombinant DNA reagent	pYB066	This study	ycgO::PlytE-optRBS-lacZ (erm)	(see Materials and Methods)
	recombinant DNA reagent	pYB069	This study	amyE::PlytE-optRBS-lacZ (kan)	(see Materials and Methods)
	recombinant DNA reagent	pYB083	This study	yhdG::Phyperspank-optRBS-lytE (cat)	(see Materials and Methods)
	recombinant DNA reagent	pYB087	This study	yvbJ::Phyperspank-optRBS-lytE (spec)	(see Materials and Methods)
	recombinant DNA reagent	pYB905	This study	yvbJ::Phyperspank-optRBS-lytE’(N-term) (cat)	(see Materials and Methods)
	recombinant DNA reagent	pYB097	This study	yvbJ::Phyperspank-optRBS-lytE’-yvrJ (cat)	(see Materials and Methods)
	recombinant DNA reagent	pYB098	This study	yvbJ::Phyperspank-optRBS-lytE’-lytH (cat)	(see Materials and Methods)
	recombinant DNA reagent	pYB100	This study	yvbJ::Phyperspank-optRBS-lytE’-lytF (cat)	(see Materials and Methods)
	recombinant DNA reagent	pYB101	This study	yvbJ::Phyperspank-optRBS-lytE’-cwlS (cat)	(see Materials and Methods)
	recombinant DNA reagent	pYB102	This study	yvbJ::Phyperspank-optRBS-lytE’-mepS (cat)	(see Materials and Methods)
	recombinant DNA reagent	pYB103	This study	yvbJ::Phyperspank-optRBS-lytE’-lytD (cat)	(see Materials and Methods)
	recombinant DNA reagent	pYB114	This study	yvbJ::Pspank-optRBS-lytE (spec)	(see Materials and Methods)
	recombinant DNA reagent	pYB139	This study	ycgO::PyocH-optRBS-lacZ (erm)	(see Materials and Methods)
	recombinant DNA reagent	pYB140	This study	ycgO::PiseA-optRBS-lacZ (erm)	(see Materials and Methods)
	recombinant DNA reagent	pYB142	This study	yhdG::PxylA-natRBS-lytE (kan)	(see Materials and Methods)
	recombinant DNA reagent	pYB159	This study	yvbJ::Phyperspank-optRBS-lytE*C247S (spec)	(see Materials and Methods)
	recombinant DNA reagent	pYB161	This study	yvbJ::lytE(∆walR box2) (erm)	(see Materials and Methods)
	recombinant DNA reagent	pYB162	This study	yvbJ::lytE (spec)	(see Materials and Methods)
	recombinant DNA reagent	pYB164	This study	ycgO::PlytE-optRBS-lacZ (∆walR box2) (erm)	(see Materials and Methods)
	recombinant DNA reagent	pYB169	This study	yhdG::PxylA-optRBS-walI (erm)	(see Materials and Methods)
	recombinant DNA reagent	pYB170	This study	yhdG::PxylA-optRBS-walI∆ECD(36-280) (erm)	(see Materials and Methods)
	recombinant DNA reagent	pYB177	This study	amyE::PlytE-optRBS-venus (cat)	(see Materials and Methods)
	recombinant DNA reagent	pYB190	This study	ycgO::Phyperspank-optRBS-iseA (erm)	(see Materials and Methods)
	peptide, recombinant protein	Mutanolysin	Sigma Aldrich	mutanolysin from Streptomyces globisporus ATCC 21553, catalog number M9901
	antibody	LytE (rabbit, polyclonal)	This study		1:10,000
	antibody	SigA (rabbit, polyclonal)	Fujita et al., 1998		1:10,000
	antibody	FtsX (rabbit, polyclonal)	Meisner et al., 2013		1:10,000
	antibody	CwlO (rabbit, polyclonal)	Meisner et al., 2013		1:10,000
	antibody	anti-rabbit IgG	BioRad	Goat anti Rabbit IgG (H/L):HRP, catalog number STAR124P, RRID:AB_1102634	1:20,000

## Sheet: Notes
Introduction
The Key Resources Table is designed to highlight the reagents and resources used in a specific study. Please include the genetically modified organisms and strains, cell lines, reagents, and software that are essential to reproduce the results presented. Note that datasets should be included in the datasets section of the submission form.
Please include a completed Key Resources Table at the start of the Materials and Methods section within your article file (this table does not need to be numbered). For consistency, please do not add subheadings to the table. Any references in the Source column should also be included in the list of references. Datasets should be entered within the datasets section of the submission form. A table…
The Key Resources Table does not need to be an exhaustive list of all the materials and resources used (e.g., essential chemicals and standard culture media do not need to be included). Please ensure that the items listed in the table are reported in the Materials and Methods section within the context of their use. We suggest that no more than ten primers and RNA sequences are included in this t…
Guidelines for creation of the Key Resources Table
Some of the constraints below are imposed to allow automated parsing of the table.
Columns (general):
(1) Column order and headings must be preserved.
(2) Columns A-E should not be removed, even if not used.
(3) Columns can be appended (F, G, etc.) for internal use.
Rows (general):
(1) Row titles (preceding the parentheses) must be preserved.
(2) Row one (column headings) should not be removed.
(3) Row 2 (headings with instructions) can be removed.
(4) Order of the rows can be changed.
(5) Clustering of multiple reagents of one type recommended, but is not mandatory.
(6) Reagent types indicated on template that are not used can be removed.
(7) Reagent types not represented in the template: use “other”.
Column A: Reagent type (mandatory)
(1) Row title (preceding parentheses) cannot be changed.
(2) See descriptions of categories in “Reagent categories” section below.
(3) If appropriate, include species within parentheses. Use full genus and full species for first mention; thereafter, initial for genus may be used.
(4) If appropriate, indicate sex after species (within the parentheses); separate by comma, space.
(5) See additional information in the section “Rows (general)” above.
Column B: Symbol/name used in publication (mandatory)
(1) This is a free-text field; there are no formatting constraints, except for separation of multiple entries by semi-colon, space.
(2) Should indicate exactly how the reagent is referred to in the publication. If several designations are used for one reagent, can include more than one entry, separated by semi-colon, space. If one designation has been used to refer to several different reagents, list each reagent separately and include a unique identifier or description parenthetically.
(3) If there is a semi-colon within the designation used, add double quotes around the entire phrase.
(4) Additional defining information can be included parenthetically (if brief).
Columns C: Source (mandatory)
(1) If reagent obtained from a public source, such as a stock center or company, list resource name.
(2) If not obtained from public source, but a published description is available, list the DOI or PMID for the publication.
(3) If reagent newly created in the publication, enter “this paper”.
(4) If none of the above, enter “other” and explain in Additional Information (Column E).
(5) If it is appropriate to indicate both a publication and a lab or researcher that provided the reagent, list the publication in this field and the lab or researcher in Additional Information.
Column D: Identifiers (not mandatory; use if possible)
(1) Use the format “ID_source:identifier” with a colon and no spaces. Separate multiple entries with a semi-colon, space.
(2) If possible, use the recommended abbreviation for the ID_source (see below).
(3) Multiple identifiers, even if redundant, are useful for validation. In some case a more general identifier (for a stock, for instance) can be combined with a more precise identifier (for the allele of interest in that stock).
(4) Inclusion of database identifiers is strongly encouraged to facilitate accurate incorporation of published data into appropriate biological databases.
Column E: Additional information
(1) Mandatory if column C entry is “this paper” or “other”. Description of new reagent or laboratory from which reagent obtained. (Free text)
(2) For antibodies, indicate dilution in parentheses (to avoid auto-formatting problems).
(3) Other pertinent information, including pointers to supplementary information or Methods section, if appropriate. (Free text)
Additional columns can be added for internal purposes (and removed prior to submission for publication): tracking acquisition by the lab, lab-specific stock numbers, storage location in the lab, comments about problems or QC, etc.
Reagent and resource categories
● Gene (indicate species) - not strictly a reagent, but unambiguous identification critical for genetic research and genetic databases.
● Strain, strain background (indicate species) - applies to whole organism; includes bacterial and virus strains or isolates. Indicate sex, if applicable.
● Genetic reagent (indicate species) - applies to mutations and variants in whole organism, including transgenically introduced constructs. For transgenic lines, indicate host species. Indicate sex, if applicable.
● Cell line (indicate species) - if a primary cell line, describe in Additional Information. Indicate sex, if applicable.
● Transfected construct (indicate species) - in cell line. Generally, indicate species of cell line; use species of construct component if that is more relevant and explain in Additional Information.
● Biological sample (indicate species) - any other biological entity, ranging from isolated tissue to defined population; describe in Additional Information. Indicate sex, if applicable.
● Antibody - include host organism common name and clonality (e.g., “mouse monoclonal”); include dilution used in Additional Information (within parentheses to avoid auto-formatting problems).
● Recombinant DNA reagent - traditional cultured clones, plasmids, cDNAs, etc., including recombinant DNA libraries.
● Sequence-based reagent - oligonucleotides, primers, morpholinos, etc.; indicate sequence.
● Peptide, recombinant protein - generally, commercially available reagents.
● Chemical compound, drug - generally, commercially available reagents.
● Commercial assay, kit - detection assays; labeling and sample preparation kits.
● Software, algorithm - newly created or previously existing.
● Other - miscellaneous other categories, including histological stains.

## Sheet: Example
Reagent type. Duplicate rows as needed. Order is flexible, but row titles must be preserved. Species (mandatory if applicable). Append in parentheses. First mention, use full genus.	Designation. Symbol/name used in publication. Separate multiple entries with semi-colon, space. (If semi-colon within designation, delimit wtith double quotes.)	Source (public). Stock center, company, data repository. Reference. Include PMID or doi; use “this paper” if new. If neither applies enter “other” and explain in Additional Information.	Identifiers. Format as ID_source:identifier. Separate multiple entries with semi-colon, space. Include catalog numbers, stock numbers, database IDs or accession numbers, RRIDs.	Additional information. Mandatory if column C entry is “this paper” or “other”. Description of new reagent; laboratory from which reagent obtained; other pertinent information.
Key Resources Table
Reagent type (species) or resource	Designation	Source or reference	Identifiers	Additional information
gene (Drosophila melanogaster)	nito	NA	FLYB:FBgn0027548
gene (D. melanogaster)	Sxl	NA	FLYB:FBgn0264270
genetic reagent (D. melanogaster)	MTD-Gal4	Bloomington Drosophila Stock Center	BDSC:31777; FLYB:FBtp0001612; RRID:BDSC_31777	FlyBase symbol: P{GAL4-nos.NGT}
genetic reagent (D. melanogaster)	ap-Gal4	Bloomington Drosophila Stock Center	BDSC:3041; FLYB:FBti0002785; RRID:BDSC_3041	FlyBase symbol: P{GawB}ap[md544]
genetic reagent (D. melanogaster)	nub-Gal4	PMID:20798049	FLYB:FBti0016825	FlyBase symbol: P{GawB}nubbin-AC-62
genetic reagent (D. melanogaster)	dome-Gal4	PMID:12403714	FLYB:FBti0022298	FlyBase symbol: P{GawB}dome[PG14]
genetic reagent (D. melanogaster)	UAS-2xEYFP	PMID:12324968	FLYB:FBtp0016537	FlyBase symbol: P{UAS-2xEYFP}
genetic reagent (D. melanogaster)	nito[HP25329]	Bloomington Drosophila Stock Center	BDSC:22092; FLYB:FBal0238892; RRID:BDSC_22092	Genotype: w[1118]; P{w[+mC]=EPg}nito[HP25329]/CyO
genetic reagent (D. melanogaster)	nito[1]	this paper		Progenitor = nito[HP25329]; imprecise excision; lethal
genetic reagent (D. melanogaster)	nito shRNA (HMJ02081)	Bloomington Drosophila Stock Center	TRiP:HMJ02081; BDSC:56852; RRID:BDSC_56852	FlyBase symbol: P{TRiP.HMJ02081}attP40
genetic reagent (D. melanogaster)	nito dsRNA (VDRC 20942)	Vienna Drosophila RNAi Center	VDRC:20942
genetic reagent (D. melanogaster)	FRT[G13]	Bloomington Drosophila Stock Center	BDSC:1956; FLYB:FBti0001247	FlyBase symbol: P{FRT(whs)}G13
genetic reagent (D. melanogaster)	"y w hsflp; ubiGFP FRT[G13]"	PMID:18160348
cell line (D. melanogaster)	S2	other	FLYB:FBtc0000181; RRID:CVCL_Z992	Cell line maintained in N. Perrimon lab; FlyBase symbol: S2-DRSC.
antibody	anti-Nito	this paper		Rabbit polyclonal; against aa 479-500; used YZ3137 (1:500)
antibody	anti-alpha-Spectrin (mouse monoclonal)	Developmental Studies Hybridoma Bank	DSHB:3A9; RRID:AB_528473	(1:10)
antibody	anti-Vasa (rabbit polyclonal)	Santa Cruz Biotechnology	Santa Cruz:sc-30210; RRID:AB_793874	(1:250)
antibody	anti-Sxl (mouse monoclonal)	Developmental Studies Hybridoma Bank	DSHB:M18; RRID:AB_528464	(1:10)
antibody	anti-GFP (rabbit polyclonal)	Molecular Probes	Molecular Probes:A-6455; RRID:AB_221570	(1:1000)
antibody	anti-GFP (mouse monoclonal)	Molecular Probes	Molecular Probes:A-11120; RRID:AB_221568	(1:200)
antibody	anti-HA (rat monoclonal)	Roche	Roche:3F10; RRID:AB_2314622
antibody	Alexa 488- or 555- secondaries	Molecular Probes		(1:1000)
other	DAPI stain	Molecular Probes		(1:1000)
recombinant DNA reagent	pAGW (Gateway vector)	Drosophila Genomics Resource Center	DGRC:1071
recombinant DNA reagent	pAHW (Gateway vector)	Drosophila Genomics Resource Center	DGRC:1095
recombinant DNA reagent	GH11110 (cDNA)	Drosophila Genomics Resource Center	DGRC:5666
recombinant DNA reagent	GFP-Nito (plasmid)	this paper		Progenitors: GH11110 (cDNA); Gateway vector pAGW
recombinant DNA reagent	HA-Sxl (plasmid)	PMID:16207758		Progentiors: PCR, UAS-Sxl flies; Gateway vector pAHW
recombinant DNA reagent	GFP-Sxl (plasmid)	PMID:16207758		Progentiors: PCR, UAS-Sxl flies; Gateway vector pAGW
